# Supplementary material for: An RNAi screen unravels the complexities of Rho GTPase networks in skin morphogenesis
Source: eLife. 2019 Sep 25;8:e50226. doi: 10.7554/eLife.50226 (PMC6768663; doi:10.7554/eLife.50226)
Supplement: Figure 1—source data 1. [file elife-50226-fig1-data1.xlsx]

## Sheet: Fig 1E
Figure 1E Cell competition assay to validate screen strategy in the epidermal fraction
	Epidermal fraction	Epidermal fraction	Epidermal fraction
	Ratio RFP+/GFP+ cells	Ratio RFP+/GFP+ cells	Ratio RFP+/GFP+ cells
Replicate	shScramble/shScramble	shCtnnb1/shScramble	shMyh9/shScramble
Embryo1	0.88	0.29	1.21
Embryo 2	0.94	0.37	1.61
Embryo 3	0.84	0.51	1.18
Embryo 4	1	0.78	1.03
Embryo 5	1.04	0.45	1.7
Embryo 6	1.03	0.33	1.27
Embryo 7	0.88	0.45	0.63
Embryo 8	0.84	0.35	0.87
Embryo 9	0.95	0.68	1.14
Embryo 10	0.99	0.39	0.85
Embryo11	1.37	0.42	0.83
Embryo 12		0.32	0.99
Embryo 13		0.3	0.82
Embryo 14			0.92
Embryo 15			0.94
Embryo 16			0.94
Embryo 17			0.72
Embryo 18			0.8

## Sheet: Fig 1F
Figure 1F Cell competition assay to validate screen strategy in the epidermal fraction
	Hair follicle fraction	Hair follicle fraction	Hair follicle fraction
	Ratio RFP+/GFP+ cells	Ratio RFP+/GFP+ cells	Ratio RFP+/GFP+ cells
Replicates	shScramble/shScramble	shCtnnb1/shScramble	shMyh9/shScramble
Embryo1	1	0.35	0.78
Embryo 2	0.97	0.26	0.87
Embryo 3	0.92	0.58	0.78
Embryo 4	0.95	0.73	0.79
Embryo 5	0.87	0.53	1.01
Embryo 6	0.98	0.47	0.75
Embryo 7	1	0.42	0.52
Embryo 8	1.28	0.25	0.5
Embryo 9	1.16	0.33	0.48
Embryo 10	2.33	0.33	0.58
Embryo11	1.34	0.23	0.68
Embryo 12		0.4	0.6
Embryo 13		0.37	0.55
Embryo 14			0.53
Embryo 15			0.8
Embryo 16			0.66
Embryo 17			0.74
Embryo 18			0.76

## Sheet: Fig 1H
Figure 1H Placode cells are infected in the same proportion as epidermal cells
		Epdermis			Placode
		Percentage of RFP+ transduced cells per field			Percentage of RFP+ transduced cells per field
Embryo 1	Field 1	11.026	Embryo 1	Field 1	7.01754
Embryo 1	Field 2	5.73066	Embryo 1	Field 2	0
Embryo 1	Field 3	11.8893	Embryo 1	Field 3	13.3333
Embryo 1	Field 4	12.963	Embryo 1	Field 4	2
Embryo 2	Field 1	11.4729	Embryo 1	Field 5	18.3673
Embryo 2	Field 2	8.62745	Embryo 2	Field 1	0
Embryo 2	Field 3	17.673	Embryo 2	Field 2	15.0538
Embryo 2	Field 4	7.88462	Embryo 2	Field 3	27.451
Embryo 3	Field 1	8.125	Embryo 2	Field 4	2.38095
Embryo 3	Field 2	16.8712	Embryo 2	Field 5	0
Embryo 3	Field 3	9.9115	Embryo 3	Field 1	11.7241
Embryo 3	Field 4	14.9477	Embryo 3	Field 2	19.4175
			Embryo 3	Field 3	12.6866
			Embryo 3	Field 4	20.6897
			Embryo 3	Field 5	10.5263

## Sheet: Fig 1I
Figure 1I Quantification of the number of placode cells vs epidermal cells at E14.5 for coverage calculation
		Epdermis			Placode
		Number of cells/mm2			Number of cells/mm2
Embryo 1	Field 1	3080.19	Embryo 1	Field 1	537.736
Embryo 1	Field 2	3292.45	Embryo 1	Field 2	325.472
Embryo 1	Field 3	2896.23	Embryo 1	Field 3	353.774
Embryo 1	Field 4	3311.32	Embryo 1	Field 4	471.698
Embryo 2	Field 1	3042.45	Embryo 1	Field 5	231.132
Embryo 2	Field 2	3608.49	Embryo 2	Field 1	405.66
Embryo 2	Field 3	3202.83	Embryo 2	Field 2	438.679
Embryo 2	Field 4	2452.83	Embryo 2	Field 3	481.132
Embryo 3	Field 1	3018.87	Embryo 2	Field 4	396.226
Embryo 3	Field 2	3075.47	Embryo 2	Field 5	537.736
Embryo 3	Field 3	2665.09	Embryo 3	Field 1	683.962
Embryo 3	Field 4	3155.66	Embryo 3	Field 2	485.849
			Embryo 3	Field 3	632.075
			Embryo 3	Field 4	547.17
			Embryo 3	Field 5	448.113
