# Supplementary material for: An RNAi screen unravels the complexities of Rho GTPase networks in skin morphogenesis
Source: eLife. 2019 Sep 25;8:e50226. doi: 10.7554/eLife.50226 (PMC6768663; doi:10.7554/eLife.50226)
Supplement: Figure 2—source data 1. [file elife-50226-fig2-data1.xlsx]

## Sheet: Fig 2E
Figure 2E Validation of Fgd2 shRNAs
	shScramble	shFgd2 TRC041	shFgd2 TRC044
% of Fgd2 mRNA	100	45.5598	51.7679
% of Fgd2 mRNA	100	17.4238	18.9511
% of Fgd2 mRNA	100	38.4535	39.1886

## Sheet: Fig 2F
Figure 2F Validation of Trio shRNA
	shScramble	shTrio TRC106	shTrio TRC107
% of Trio mRNA	100	61.1722	34.2007
% of Trio mRNA	100	80.6887	48.7264
% of Trio mRNA	100	55.3015	69.589

## Sheet: Fig 2G
Figure 2G Validation of Rhou shRNA
	shScramble	shRhou TRC360	shRhou TRC504	shRhou TRC505
% of Rhou mRNA	100	24.92	20.01	20.01
% of Rhou mRNA	100	39.11	51.11	51.11
% of Rhou mRNA	100	22.2	36.82	36.82
% of Rhou mRNA	100		10.01	10.01

## Sheet: Fig 2H
Figure 2H Quantification of hair follicle waves in control, FGD2, TRIO and RHOU depleted tissues
	shScramble			shFgd2			shTrio			shRhou
	embryo 1	embryo 2	embryo 3	embryo 1	embryo 2	embryo 3	embryo 1	embryo 2	embryo 3	embryo 1	embryo 2	embryo 3	embryo 4	embryo 5
	Number/mm2			Number/mm2			Number/mm2			Number/mm2
Hair placode	36.3322	37.0242	37.0242	19.7232	14.8789	22.4913	25.9516	40.4844	40.8304	16.955	17.301	40.4844	35.6401	33.218
Hair germ	21.7993	22.4913	17.301	7.26644	4.84429	4.49827	6.57439	9.68858	23.5294	7.95848	2.07612	26.9896	17.6471	22.1453
Hair peg	22.4913	20.7612	16.955	3.11419	4.15225	4.15225	7.61246	14.8789	21.4533	4.49827	5.53633	20.7612	16.955	30.7958
