# Supplementary material for: An RNAi screen unravels the complexities of Rho GTPase networks in skin morphogenesis
Source: eLife. 2019 Sep 25;8:e50226. doi: 10.7554/eLife.50226 (PMC6768663; doi:10.7554/eLife.50226)
Supplement: Figure 3—source data 1. [file elife-50226-fig3-data1.xlsx]

## Sheet: Fig 3B
Figure 3B Pourcentage of E18.5 infected cells with EDU incorporation
	shScr			shRhou-505
	Embryo 1	Embryo 2	Embryo 3	Embryo 1	Embryo 2	Embryo 3
E18.5 Epidermis	6.9869	27.9605	18.2648	25.6966	24.8434	20.202
E18.5 Hair follicle	36.8276	39.6061	39.5189	26.8041	34.0397	35.9756
