# Supplementary material for: An RNAi screen unravels the complexities of Rho GTPase networks in skin morphogenesis
Source: eLife. 2019 Sep 25;8:e50226. doi: 10.7554/eLife.50226 (PMC6768663; doi:10.7554/eLife.50226)
Supplement: Figure 4—source data 1. [file elife-50226-fig4-data1.xlsx]

## Sheet: Fig 4A
Figure 4A Orientation (angle) of the hair follicle along the anterior and posterior axis of E18.5 embryo
		E18.5 shScr	E18.5 shRhou-505	E18.5 shScr	E18.5 shRhou-505
		(for shRhou-505 animals)		(for shRhou-504 animals)
	Hair follicle no	Hair follicle angle	Hair follicle angle	Hair follicle angle	Hair follicle angle
	1	-0.897	-24.379	17.008	17.199
	2	-22.04	10.399	10.989	-78.179
	3	27.516	22.22	13.473	-58.173
	4	18.095	-23.592	0	-78.486
	5	4.736	-3.462	38.884	-61.928
	6	7.606	13.125	0	-112.574
	7	15.211	18.043	0	-104.381
	8	-13.687	-50.31	-1.71	-74.055
	9	-0.291	-11.103	0	9.62
	10	12.809	6	-3.652	-85.914
	11	17.944	10.764	13.736	-106.858
	12	16.784	-7.241	23.629	-99.246
	13	-10.504	1.486	24.444	-172.504
	14	6.895	-26.471	9.13	1.848
	15	5.045	-25.43	10.923	6.459
	16	8.862	-82.755	13.325	16.46
	17	6	-18.121	3.434	-9.462
	18	-10.46	-34.236	17.904	29.859
	19	6	2.934	6.009	56.023
	20	2.1	1.101	-0.939	10.521
	21	7.364	-77.928	4.332	28.968
	22	2.479	-20.565	5.44	20.266
	23	13.386	186	-4.236	12.265
	24	4.668	-102.628	12.995	6.009
	25	10.538	-23.526	8.973	-21.038
	26	-12.435	-42.532	7.524	1.302
	27	8.203	-28.461	1.023	17.987
	28	-1.989	-29.87	3.066	-9.638
	29	6	-7.349	32.471	12.68
	30	9.24	-22.179	21.251	16.504
	31	8.603	-18.905	19.654	36.656
	32	28.891	41.395	5.599	-75.964
	33	10.086	131.218	17.241	-79.114
	34	6	81.069	9.246	-92.726
	35	-18.341	25.058	-3.652	-131.987
	36	33.408	42.703	1.548	-117.15
	37	2.186	-100.699	15.124	-111.125
	38	-2.616	-43.399	38.66	-17.281
	39	-39.939	177.119	0	-72.824
	40	-28.077	91.601	5.572	-83.48
	41	18.633	106.389	1.507	-2.726
	42	-7.241	115.502	31.759	0
	43	-1.595	-159.964	36.254	-1.364
	44	6	-135.34	2.291	5.877
	45	6	-66.216	0	-7.461
	46	3.064	-90.843	-14.676	17.176
	47	7.302	-148.398	0	15.524
	48	-1.943	-117.845	24.146	-3.504
	49	-8.036	-56.301	-6.789	8.13
	50	6	-84	13.761	25.821
	51	-1.943	54.013	-10.305	12.875
	52	-3.039	-25.122	0	13.241
	53	4.493	76.974	0	-3.094
	54	-7.707	119.962	3.608	29.539
	55	22.336	87.951	0	19.29
	56	6	142.397	26.565	-14.036
	57	6	80.291	-27.759	-21.801
	58	2.121	127.218	1.637	-68.199
	59	6	109.496	-12.665	-38.418
	60	19.241	133.093	4.289	-79.38
	61	8.161	170.745	-22.694	-80.34
	62	32.565	-2.881	-7.539	-92.603
	63	6	-4.685	-4.764	-109.983
	64	11.29	-1.125	2.936	-101.689
	65	-1.595	6	25.463	-19.855
	66	6	16.954	0	-20.323
	67	6	1.389	10.008	29.197
	68	4.152	24.435	0	19.093
	69	4.21	47.878	15.524	73.856
	70	2.906	6	-6.34	31.608
	71	6	-27.944	4.086	14.036
	72	4.531	8.01	11.041	-12.095
	73	4.531	-3.752	-8.653	-3.991
	74	7.637	-51.265	-11.094	-24.905
	75	6	-8.036	20.556	-27.096
	76	7.081	-12.083	9.782	-52.125
	77	30.905	-19.796	0	-48.504
	78	-23.124	103.237	4.667	1.193
	79	1.515	123.3	0	49.236
	80	-27.69	-144.573	0	6.981
	81	-8.574	115.722	1.909	-19.179
	82	-11.103	133.875	1.528	9.189
	83	-9.255	-6.653	12.529	17.65
	84	0.289	-15.038	11.634	-6.633
	85	12.582	24.104	-13.092	0
	86	13.352	134.956	6.459	-35.538
	87	-16.036	-144.573	14.036	-16.928
	88	-10.699	3.754	26.565	-122.55
	89	-0.911	-22.072	0	-136.469
	90	26.772	0.053	-11.634	-90
	91	-1.496	1.601	0	-145.886
	92	6	40.695	35.789	-51.34
	93	2.186	-24.763	14.931	-152.949
	94	4.668	-1.125	2.663	-103.092
	95	-29.754	31.278	-2.175	0
	96	11.906	-72.871	20.726	29.055
	97	-12.435	-24.379	-11.004	12.529
	98	-39	-0.911	0	-88.531
	99	-34.601	-44.528	0	-105.255
	100	-11.103	-14.095	14.036	-63.435
	101	17.689	-3.593	21.501	32.196
	102	-32.157	-44.631	21.801	-9.211
	103	16.784	6	0	-0.988
	104	6	-21.759	-9.819	-16.821
	105	-3.951	-12.925	17.447	-17.526
	106	-16.751	-51.426	25.017	-18.435
	107	6	-31.147	0	-17.103
	108	-8.036	-84	1.79	30.466
	109	37.264	1.03	20.556	0
	110	2.82	0.472	0	-32.905
	111	0.472	-59.344	-9.866	6.789
	112	-6.095	-43.086	0	15.018
	113	6	-61.036	-8.686	-51.633
	114	6	-91.853	-12.995	9.462
	115	10.514	-67.74	0	-69.864
	116	15.462	-22.179	1.397	-71.003
	117	-9.376	26.556	-43.531	-9.689
	118	-12.97	-35.73	25.463	-11.889
	119	-16.166	106.823	28.072	-21.801
	120	6	96	16.504	16.314
	121	6	-20.565	22.751	-46.123
	122	6	-72.69	-11.31	-18.435
	123	37.608	-47.746	-11.31	-57.995
	124	3.138	-15.251	12.995	-26.565
	125	-25.759	-55.858	0	14.036
	126	-27.69	-48.462	16.598	-23.629
	127	-6.724	-38.061	0	-8.366
	128	-4.008	-31.875	9.782	25.71
	129	-19.907	-9.593	0	-2.437
	130	0.806	-19.084	20.225	25.866
	131	-6.724	2.532	0	-34.992
	132	-1.907	-16.011	2.726	-20.266
	133	-8.421	125.291	-8.973	80.395
	134	6	123.699	-5.906	58.392
	135	-6.529	83.619	14.349	116.131
	136	-14.323	114.435	0	73.686
	137	-27.024	107.592	5.711	53.673
	138	7.975	139.919	0	-26.565
	139	-23.249	25.385	6.116	20.225
	140	-15.448	-168.289	0	60.255
	141	17.768	-81.51	0	-12.804
	142	-16.249	-35.634	-1.507	39.958
	143	6	-39.785	18.435	-2.793
	144	-0.116	-2.973	6.009	-26.565
	145	6	6	10.008	82.405
	146	-16.932	-37.025	20.136	154.093
	147	9.945	-25.293	-4.399	52.253
	148	16.008	-40.848	3.434	40.914
	149	-5.31	-5.976	3.814	0
	150	16.886	-22.951	0	62.7
	151	6	-133.399	-22.068	29.745
	152	-35.634	170.055	-13.241	109.983
	153	-6.529	-75.703	-10.62	90
	154	9.366	-71.905	-2.121	102.529
	155	-17.499	128.125	3.814	105.068
	156	-3.866	75.775	-6.71	84.644
	157	-8.036	-38.215	-6.116	85.601
	158	-18.444	17.31	19.799	52.125
	159	-11.879	-37.958	-3.225	-5.44
	160	-22.811	-8.859	-11.821	-11.31
	161	-20.565	68.021	9.926	30.964
	162	-0.911	104.366	-22.62	43.264
	163	6	64.392	2.49	-8.326
	164	10.081	-164.538	14.381	-1.469
	165	5.782	-73.695	0	10.125
	166	0	20.676	0	18.435
	167	-31.079	-84	-2.121	0
	168	-14.47	24.004	-11.31	-27.15
	169	-7.253	-3.462	10.176	-18.153
	170	-11.31	-20.565	2.726	6.072
	171	-21.615	137.987	17.65	81.634
	172	-20.704	-24.256	10.62	90
	173	-2.961	-24.141	0	141.582
	174	1.287	-26.574	10.081	120.651
	175	-4.899	22.26	-1.273	165.069
	176	14.765	-165.724	3.366	88.091
	177	6.116	156.945	-4.764	90
	178	4.635	4.698	-5.042	-7.853
	179	-22.286	6	0	43.531
	180	-9.462	-4.008	-11.004	-8.616
	181	24.444	12.724	0	17.526
	182	17.85	53.973	-2.045	-20.323
	183	13.241	50.194	11.689	-9.462
	184	34.114	92.246	-12.265	69.864
	185	-0.818	0	0	125.91
	186	32.504	0	0	129.401
	187	-18.687	19.134	-2.684	91.432
	188	8.297	20.095	0	69.624
	189	0	33.341	-5.528	-17.199
	190	30.838	52.028	3.991	-19.502
	191	32.074	24.624	-7.496	-33.69
	192	19.885	78.69	0	-23.051
	193	30.651	51.34	5.194	4.514
	194	19.904	42.709	-4.764	25.769
	195	20.556	55.491	3.731	4.236
	196	-5.315	67.797	-14.574	123.69
	197	27.824	141.442	4.485	38.991
	198	38.254	-63.947	-10.539	-26.565
	199	31.43	-169.38	5.356	84.806
	200	0	-135	2.545	115.769
	201	24.538	-83.387	0	80.754
	202	-0.83	-123.69	15.709	45
	203	11.004	-127.304	-5.44	14.931
	204	-5.356	-49.939	-14.715	0
	205	-15.255	-65.501	-7.907	-7.853
	206	16.06	-62.784	-9.335	20.376
	207	12.529	-20.746	-2.921	-35.311
	208	37.747	-14.265	4.844	-41.76
	209	10.469	-31.799	0	7.306
	210	-15.154	-110.323	6.71	53.13
	211	-16.164	-24.656	12.995	90
	212	-47.726	-71.114	12.995	115.56
	213	-5.29	-23.575	14.036	97.125
	214	-7.125	-40.732	6.766	80.538
	215	-15.751	-4.994	7.853	0
	216	10.751	7.712	0	-31.218
	217	0	-90	11.634	-19.799
	218	4.764	-83.29	0	-25.115
	219	9.09	-88.386	0	-19.231
	220	-7.125	-82.528	0	-17.879
	221	0.924	8.393	0	22.068
	222	9.752	87.955	12.095	7.765
	223	20.433	147.225	3.468	-4.316
	224	8.653	97.853	-3.691	-12.308
	225	4.844	74.521	7.125	-28.811
	226	13.241	74.899	4.574	-32.005
	227	23.552	114.362	12.095	-3.991
	228	5.013	86.121	23.459	-27.181
	229	12.011	25.301	14.036	-24.075
	230	16.504	27.597	0	-10.954
	231	5.906	100.437	16.991	-20.556
	232	5.08	41.923	27.408	39.56
	233	13.325	74.578	18.435	-10.305
	234	5.856	82.03	0	-19.983
	235	33.69	32.4	19.855	-21.801
	236	24.842	180	18.435	55.305
	237	0	90	3.945	90
	238	8.746	55.62	2.121	71.565
	239	-7.539	58.815	12.995	-16.144
	240	34.592	140.774	-2.291	-2.862
	241	16.699	-48.9	12.804	12.804
	242	16.39	-3.27	6.116	25.346
	243	0	-80.538	19.592	21.801
	244	24.905	-70.346	7.125	17.745
	245	22.109	-81.027	0	131.186
	246	-3.991	-140.648	0	10.408
	247	1.848	-77.661	6.582	-22.714
	248	2.083	-49.939	14.826	-6.582
	249	-4.485	-40.601	10.125	0
	250	10.081	-62.969	15.154	29.745
	251	-8.973	17.745	46.219	12.995
	252	-1.878	-123.071	40.236	-24.624
	253	5.807	127.367	43.452	-12.529
	254	22.834	125.882	13.658	33.311
	255	33.996	90.895	14.676	19.093
	256	2.936	87.955	10.081	-20.695
	257	35.134	63.886	41.987	-9.866
	258	4.667	94.865	40.314	42.357
	259	-6.054	90	35.395	66.801
	260	12.265	-113.429	0.843	53.616
	261	10.437	-36.529	17.418	49.97
	262	-28.811	-22.443	29.539	12.804
	263	6.52	-48.18	0	12.529
	264	0	-121.759	4.185	19.29
	265	0	-1.818	-0.644	-21.801
	266	-17.199	-51.147	0	-58.496
	267	35.838	35.166	3.504	36.87
	268	15.945	52.125	0	32.905
	269	27.35	45.644	13.761	-23.962
	270	4.185	53.471	16.26	12.095
	271	-9.638	32.574	-5.572	92.603
	272	-21.501	156.801	11.31	0
	273	0	-158.009	27.646	-10.886
	274	1.123	-13.069	17.241	45
	275	9.293	-54.689	0	56.31
	276	24.538	-138.366	18.435	-28.301
	277	3.18	-122.106	7.907	30.174
	278	11.31	18.8	0	6.34
	279	8.366	40.764	0	75.75
	280	2.545	26.003	22.38	13.601
	281	-7.275	27.759	38.66	75.964
	282	9.462	14.036	10.437	13.782
	283	1.245	-21.631	23.499	-2.77
	284	32.32	-30.964	16.821	23.962
	285	19.29	-129.806	16.504	1.736
	286	2.291	32.229	19.654	0.623
	287	19.983	117.553	14.534	0
	288	-5.194	105.154	20.726	-10.305
	289	17.7	123.69	0	-7.4
	290	0	35.272	55.408	26.565
	291	-9.293	174.447	9.689	41.186
	292	17.241	141.667	1.507	29.745
	293	39.369	154.983	-8.746	42.797
	294	17.928	-90	1.102	18.886
	295	34.695	-132.455	-21.448	18.435
	296	24.567	12.653	-29.055	45.971
	297	-18.825	35.707	14.744	18.435
	298	-45	-127.999	5.29	12.68
	299	-23.429	154.231	3.814	30.069
	300	17.745	130.101	34.875	48.814
	301	29.539	-13.431	1.146	11.31
	302	37.875	-29.604	30.964	17.103
	303	32.347	-55.408	15.068	16.189
	304	-36.469	-30.256	0	11.31
	305	-53.471	-20.726	0	12.381
	306	-39.174	-63.435	1.023	12.804
	307	30.379	-28.443	5.886	41.634
	308	-36.607	-31.329	7.352	39.806
	309	30.7	-23.199	27.216	-4.764
	310	1.507	0	0	23.962
	311	1.79	38.66	0	49.399
	312	17.241	-27.979	15.422	28.072
	313	14.931	-7.125	17.969	-18.853
	314	-6.71	-35.942	-1.534	-19.983
	315	-28.811	-64.799	2.121	14.265
	316	9.62	-41.634	0	26.003
	317	8.616	-26.565	-2.083	22.989
	318	6.582	55.713	0	10.437
	319	-50.528	21.801	-24.146	-6.072
	320	25.71	-67.068	-26.565	22.068
	321	0	72.255	1.848	33.341
	322	-24.905	-36.327	-12.995	-14.349
	323	-22.751	-53.569	0	-1.432
	324	0	-128.454	-9.189	21.801
	325	6.34	-20.433	-6.34	-10.408
	326	-24.775	-18.853	22.62	11.592
	327	28.887	132.955	-1.736	36.529
	328	20.556	85.986	0	45
	329	17.745	91.273	15.255	33.69
	330	0	39.806	1.469	30.651
	331	10.713	96.34	0	5.856
	332	1.364	-20.376	0	45
	333	8.043	-135.807	8.326	20.925
	334	13.782	40.601	0	-15.524
	335	-17.58	-67.694	-8.616	21.038
	336	-16.46	-25.201	-1.548	19.983
	337	0	-21.595	20.854	16.557
	338	0	13.707	3.27	16.39
	339	-5.5	-47.42	-11.31	14.657
	340	-12.433	9.211	-12.995	17.879
	341	-1.548	-43.531	17.676	33.69
	342	2.246	-31.357	-21.318	31.43
	343	8.807	-64.799	-16.144	8.471
	344	-17.435	-37.235	0	0
	345	-4.357	-23.429	5.389	15.376
	346	0.807	11.31	-2.203	-6.009
	347	-18.435	-4.236	0	-3.27
	348	7.8	-23.385	32.957	21.501
	349	-15.35	24.842	3.576	15.124
	350	0	-13.325	-28.258	20.41
	351	9.462	-15.524	-1.023	19.179
	352	12.44	6.911	22.834	-6.009
	353	14.036	35.154	8.973	34.16
	354	1.206	38.66	2.684	20.433
	355	11.889	35.218	5.599	7.595
	356	28.301	19.983	-4.865	-24.444
	357	17.879	0	14.676	0
	358	12.995	-33.69	14.744	17.199
	359	16.821	-14.036	19.231	23.806
	360	14.783	-9.782	18.166	-15.593
	361	17.526	-51.072	0	0
	362	13.707	0	-25.56	45
	363	10.305	0	9.866	13.055
	364	-17.571	-3.468	-12.758	-6.34
	365	-5.29	27.255	-4.316	0
	366	18.853	-59.3	21.595	-4.667
	367	-14.036	-103.736	-9.926	-24.305
	368	5.042	-50.711	13.173	-18.712
	369	2.386	-14.744	-10.886	0
	370	4.332	-2.386	-29.168	11.592
	371	18.435	22.306	-28.926	-3.094
	372	-15.662	40.815	-45	31.608
	373	2.862	-16.46	-19.855	26.565
	374	-3.814	48.013	12.095	-20.854
	375	18.004	6.843	-21.318	51.34
	376	22.543	15.422	-4.485	0
	377	2.203	5.315	19.134	5.906
	378	2.726	-32.989	15.593	25.641
	379	0.796	-53.13	-8.584	38.991
	380	8.366	-53.13	22.38	51.953
	381	2.526	-36.87	12.095	-22.036
	382	18.138	-25.017	-35.538	7.765
	383	8.881	-32.152	11.041	-41.468
	384	9.834	-60.573	-24.057	-5.44
	385	11.497	7.125	-9.246	-5.599
	386	13.241	12.926	1.081	-4.764
	387	30.816	-78.69	4.485	-12.2
	388	-12.724	43.958	4.667	0
	389	-7.263	3.417	-16.699	-17.103
	390	-7.046	-25.974	43.958	-2.386
	391	0.818	43.531	0	-1.123
	392	5.194	40.03	-7.539	-18.435
	393	3.945	-20.925	-14.421	9.039
	394	4.97	39.806	-12.095	-27.613
	395	10.923	22.068	-24.717	25.907
	396	0	-74.249	1.469	10.491
	397	-19.29	-50.631	-19.179	0
	398	0.909	3.013	0	59.349
	399	9.819	29.578	11.31	45
	400	7.386	-55.923	-45	27.216
	401	17.969	35.942	4.764	85.101
	402	3.879	-12.724	11.07	59.744
	403	0.251	31.43	-4.764	9.782
	404	9.545	-39.644	11.889	24.305
	405	-4.086	-48.013	5.711	26.565
	406	10.784	-31.608	-18.004	10.954
	407	0	36.87	-11.041	5.194
	408	-10.521	20.925	0	-32.152
	409	0.988	24.146	15.524	-8.616
	410	0.623	35.91	-11.929	-28.61
	411	-1.254	-67.989	-17.103	9.926
	412	6.116	-22.714	-19.983	7.125
	413	14.657	-15.709	20.136	-30.964
	414	17.819	-19.29	-11.634	24.624
	415	-7.224	-25.942	28.443	15.068
	416	-15.255	-1.302	0	-14.036
	417	-27.242	2.291	-48.013	-51.843
	418	-6.394	-86.269	0	-26.053
	419	-7.017	41.186	28.926	-27.824
	420	0	29.745	25.942	-43.21
	421	4.764	36.469	21.615	-32.196
	422	-11.47	52.306	22.068	-1.685
	423	1.123	47.643	-4.899	-49.97
	424	-0.955	35.538	-28.301	-13.349
	425	-1.364	-40.601	-10.204	15.376
	426	0	-56.768	-13.707	21.801
	427	7.253	-14.349	17.103	0
	428	15.945	30.466	-18.435	0
	429	-2.437	-30.53	-25.677	0
	430	36.469	-36.87	-8.13	21.251
	431	4.086	-48.18	20.556	0
	432	0	-52.306	16.526	28.706
	433	8.616	25.278	0	-2.386
	434	-11.903	26.565	-9.926	3.366
	435	-20.344	22.62	-12.057	0
	436	0	-18.435	-19.44	-1.123
	437	9.31	4.635	5.711	-22.109
	438	-31.535	-14.036	-18.06	15.945
	439	0	-25.974	-34.216	23.962
	440	1.909	-68.199	-15.945	-29.476
	441	-7.206	-45	27.15	-5.572
	442	-3.991	-54.689	1.507	31.218
	443	7.352	-2.862	34.216	-11.31
	444	10.886	11.004	0	21.801
	445	8.637	-36.254	-3.945	18.97
	446	-3.556	46.169	5.194	0
	447	14.826	-35.311	0	0
	448	14.036	-59.657	-12.2	-14.036
	449	16.46	-34.592	0	-32.471
	450	1.637	-50.711	-5.194	-36.87
	451	0	-36.027	-39.987	-2.545
	452	2.663	-18.435	-48.576	2.793
	453	2.361	-60.255	11.689	-25.408
	454	-35.154	-74.055	6.34	-20.556
	455	-14.973	83.418	13.799	-41.186
	456	-1.102	21.038	-7.125	1.848
	457	2.603	3.18	-2.936	-28.74
	458	2.121	29.745	-25.641	86.424
	459	0	-99.462	0	-16.858
	460	10.62	-59.349	1.364	-38.928
	461	-3.18	-55.923	26.565	14.036
	462	3.366	-46.469	-3.013	-20.323
	463	14.036	-60.255	-10.437	7.431
	464	11.944	-54.162	19.537	-25.907
	465	0	22.751	-12.095	0
	466	-14.036	-80.789	-6.633	-1.736
	467	0	-83.019	0	-2.045
	468	-6.934	16.557	8.427	0
	469	-2.726	-75.964	12.095	10.886
	470	9.62	-88.152	0	10.125
	471	-4.526	-53.427	0
	472		-52.595	-2.603
	473		-118.74	-25.463
	474		39.644	1.736
	475		-66.251	0
	476		-30.964	-7.496
	477		-63.435	0
	478		-91.081	0
	479		-34.16	9.09
	480		-16.144	11.634
	481		-24.444	0
	482		-36.656	0
	483		0	5.906
	484		0	0
	485			2.203
	486			11.976
	487			0
	488			3.094
	489			9.866
	490			5.44
	491			0
	492			3.366
	493			3.434
	494			0
	495			0
	496			2.603
	497			0
	498			2.663
	499			2.045
	500			10.954
	501			10.62
	502			2.603

## Sheet: Fig 4B
Figure 4B Percentage of Perpendicular and Angled Hair follicles
		Perpendicular Hair follicle						Angled Hair follicle
		Embryo 1	Embryo 2	Embryo 3	Embryo 4	Embryo 5	Embryo 6	Embryo 1	Embryo 2	Embryo 3	Embryo 4	Embryo 5	Embryo 6
	Condition	%	%	%	%	%	%	%	%	%	%	%	%
	shScramble	5.6926	5.61798	6.96203	5.47945	9.87654	11.1111	94.3074	94.382	93.038	94.5205	90.1235	88.88
	shRhou-504	20.5479	22.449	14.3969				79.4521	77.551	85.6031
	shRhou-505	19.0217	27.5701	21.1268				80.9783	72.4299	78.8732

## Sheet: Fig 4C
Figure 4C Orientation of CELSR1 angle of plannar cell polarization
		E16.5 CTRL	E16.5 shRhou-505	E15.5 CTRL	E15.5 shRhou-505
		Angle CELSR1	Angle CELSR1	Angle CELSR1	Angle CELSR1
		Number of Cells quantified:528	Number of Cells quantified:400	Number of Cells quantified: 382	Number of Cells quantified: 523
		Number of cells planar polarized:319	Number of cells planar polarized:158	Number of cells planar polarized: 184	Number of cells planar polarized: 81
		-6.31	13.241	5.711	13.241
		-2.431	0	0	0
		-24.055	11.31	0	11.31
		-7.995	25.346	0	25.346
		8.814	-35.218	0	-35.218
		-17.62	20.556	2.726	20.556
		-3.13	32.905	-19.799	32.905
		-18.199	0	-24.444	0
		-9.036	16.699	-17.65	16.699
		-36.634	-8.531	-24.444	-8.531
		-15.225	6.582	-28.072	6.582
		8.366	35.538	-45	35.538
		-15.854	23.962	-23.199	23.962
		1.634	30.964	31.608	30.964
		16.31	0	3.576	0
		5	41.987	-24.146	41.987
		8.013	-26.565	-2.862	-26.565
		-9.744	-11.768	0	-11.768
		5	-30.069	-14.036	-30.069
		-9.931	-33.69	-5.711	-33.69
		1.82	-28.61	-10.305	-28.61
		5	-15.068	-10.491	-15.068
		-2.125	-20.556	2.603	-20.556
		12.595	14.621	15.524	14.621
		5	-34.287	2.603	-34.287
		-15.556	-42.51	0	-42.51
		-8.241	19.654	0	19.654
		-9.036	-10.784	-21.251	-10.784
		28.199	0	0	0
		-10.945	-2.726	2.862	-2.726
		20.945	27.759	-28.61	27.759
		-18.962	30.256	0	30.256
		5	24.444	4.086	24.444
		16.31	34.992	14.036	34.992
		5	4.399	-8.973	4.399
		10.44	4.764	-6.34	4.764
		5	22.38	12.095	22.38
		5	-10.008	-5.44	-10.008
		5	36.87	0	36.87
		11.71	38.66	-3.366	38.66
		33.301	28.61	0	28.61
		-7.529	-48.366	0	-48.366
		15.62	-36.158	6.009	-36.158
		24.654	-28.301	-10.008	-28.301
		21.39	-2.386	-36.87	-2.386
		15.008	-10.784	-11.31	-10.784
		26.801	-17.65	19.29	-17.65
		18.241	-29.745	7.765	-29.745
		34.358	18.435	-7.765	18.435
		-1.582	0	-14.621	0
		15.784	147.265	43.781	147.265
		32.897	19.654	0	19.654
		10.44	-25.56	-11.31	-25.56
		-27.735	2.726	24.228	2.726
		8.576	32.471	-14.036	32.471
		50	-6.71	-15.945	-6.71
		-26.608	12.529	15.945	12.529
		-33.157	9.462	0	9.462
		12.125	-8.746	0	-8.746
		5	21.565	0	21.565
		5	21.565	-14.036	21.565
		-5.305	-95	-20.225	-95
		-13.435	-1.186	-12.529	-1.186
		-15.323	51.31	-14.931	51.31
		-12.65	73.69	0	73.69
		-28.69	36.186	20.854	36.186
		39.509	28.69	32.471	28.69
		23.435	25.069	-10.008	25.069
		1.186	-29.228	0	-29.228
		5	43.366	-7.595	43.366
		20.945	26.608	4.086	26.608
		28.629	-100.711	0	-100.711
		28.199	-95	0	-95
		19.744	40	17.354	40
		5	-5	-6.009	-5
		19.931	-0.236	-8.13	-0.236
		9.764	-68.435	6.34	-68.435
		-20.201	50.305	0	50.305
		-9.036	34.806	0	34.806
		-4.462	-19.036	2.49	-19.036
		-6.31	-58.746	9.866	-58.746
		-3.973	-107.995	-5.711	-107.995
		-1.71	23.072	2.49	23.072
		-7.265	57.241	0	57.241
		12.595	-7.49	16.39	-7.49
		-21.565	-1.82	-9.462	-1.82
		-11.39	-2.51	4.574	-2.51
		14.09	-1.532	20.854	-1.532
		-3.973	67.897	-15.255	67.897
		-57.65	31.87	-3.013	31.87
		5	44.899	-12.804	44.899
		-9.036	18.962	3.366	18.962
		-18.199	-13.531	-7.125	-13.531
		-17.62	48.746	9.462	48.746
		13.973	-5	0	-5
		24.654	53.57	18.435	53.57
		5	2.125	20.225	2.125
		79.476	21.565	0	21.565
		-50.305	31.87	28.301	31.87
		-32.569	49.462	0	49.462
		-48.746	25.256	7.595	25.256
		-4.462	14.29	0	14.29
		-13.435	106.801	0	106.801
		-24.745	-1.634	9.462	-1.634
		-18.962	32.405	0	32.405
		27.38	34.094	0	34.094
		14.866	27.005	0	27.005
		40.218	59.799	0	59.799
		5	-13.531	-3.18	-13.531
		-1.009	-15.784	4.086	-15.784
		22.103	36.987	-10.305	36.987
		5	-58.616	-10.62	-58.616
		15.62	10.255	-6.009	10.255
		-3.13	28.69	14.036	28.69
		-8.241	55.255	3.366	55.255
		5	37.274	23.629	37.274
		-12.103	14.799	0	14.799
		-12.526	29.992	-3.366	29.992
		4.036	25.964	0	25.964
		1.889	21.565	4.97	21.565
		4.036	28.111	0	28.111
		-10	4.462	-3.366	4.462
		9.654	49.162	0	49.162
		-4.289	34.289	-4.086	34.289
		-8.025	12.65	1.548	12.65
		15.463	12.526	0	12.526
		22.471	-7.203	26.565	-7.203
		13.962	35.914	32.471	35.914
		22.471	21.565	42.274	21.565
		1.889	-9.764	-11.31	-9.764
		-20.62	21.565	-15.642	21.565
		32.879	3.13	0	3.13
		24.695	-2.397	-19.983	-2.397
		-10	-5	-13.392	-5
		-18.973	11.39	-8.427	11.39
		37.291	80.236	0	80.236
		-26.39	3.531	2.862	3.531
		17.897	13.435	-10.886	13.435
		21.608	-7.203	-4.574	-7.203
		-52.709	-5	2.862	-5
		11.801	-48.025	-7.125	-48.025
		2.095	-44.289	-4.97	-44.289
		35	22.759	-28.811	22.759
		-18.13	-11.34	-14.534	-11.34
		-10	5.886	-6.843	5.886
		-35.56	21.565	-19.654	21.565
		1.889	37.879	41.186	37.879
		22.005	-35.579	-19.29	-35.579
		-10	-7.49	-18.435	-7.49
		-16.71	41.736	-29.745	41.736
		-5.914	2.431	0	2.431
		-16.843	30.538	0	30.538
		-15.44	-27.249	24.444	-27.249
		40.194	17.932	25.201	17.932
		24.695	-1.634	0	-1.634
		9.654	-5	-20.225	-5
		31.424	-30.201	-18.435	-30.201
		24.509	-25.925	0	-25.925
		29.094		-25.346
		-19.462		0
		15.201		-5.906
		25.538		-6.34
		-32.62		0
		9.29		14.534
		4.744		25.017
		1.889		5.194
		29.289		23.199
		-24.036		15.255
		157.005		0
		-27.526		-16.39
		4.744		0
		-10		32.735
		-25.524		3.013
		-31.801		7.765
		30.914		2.49
		-14.399		-8.746
		35		-7.765
		24.992		21.038
		-10		0
		-10		-8.973
		-42.005		-9.462
		8.435		11.31
		-1.87		0
		22.005		28.072
		19.055
		31.987
		8.435
		-10
		-10
		24.509
		22.735
		-10
		-29.44
		-10
		2.095
		-18.531
		-25.524
		25.538
		-10
		18.811
		18.072
		-10
		8.435
		-5.914
		27.569
		22.276
		-23.57
		-10
		-10
		20.256
		-34.228
		-23.496
		-19.462
		37.49
		41.34
		12.166
		12.62
		7.819
		30.236
		-10
		31.424
		-5.914
		-21.31
		1.31
		-20.008
		14.444
		11.801
		-17.595
		24.38
		1.31
		29.289
		6.26
		-45
		-16.699
		-37.875
		-45
		7.125
		4.764
		-3.18
		11.31
		15.945
		26.565
		14.036
		-25.201
		-14.036
		-26.565
		-8.746
		11.31
		-26.565
		6.34
		0
		18.435
		18.435
		-7.125
		26.565
		28.61
		0
		14.744
		-4.764
		10.62
		7.125
		-12.265
		39.806
		45
		15.642
		-27.759
		2.045
		7.352
		1.975
		0
		-4.764
		-19.654
		-26.565
		-5.711
		-5.711
		0
		-6.34
		0
		-7.595
		3.013
		-10.886
		0
		0
		0
		-3.366
		-8.531
		-17.103
		-41.634
		12.529
		0
		0
		-8.531
		0
		0
		-15.255
		-18.435
		-29.745
		-19.44
		0
		-4.97
		-19.983
		11.768
		-16.699
		-11.889
		-26.565
		-36.87
		-33.024
		-11.889
		-7.125
		26.565
		18.435
		21.038
		0
		14.036
		-3.814
		14.036
		-12.804
		-12.095

## Sheet: Fig 4D
Figure 4D	Pourcentage of basal cell that show CELSR1 polarization between two oposing membrane domain
		Control				shRhou-505
	Time point	Embryo 1	Embryo 2	Embryo 3	Embryo 4	Embryo 1	Embryo 2	Embryo 3	Embryo 4
	E14.5	12.85	9.375	20.4082		9.09	7.81	10.101
	E15.5	50	46.7	51.7986	42.5532	16.47	17.61	11.97	19.685
	E16.5	62.26	62.16	52.12	58.4615	49.58	41.3	29.37	50.7692
