# Supplementary material for: An RNAi screen unravels the complexities of Rho GTPase networks in skin morphogenesis
Source: eLife. 2019 Sep 25;8:e50226. doi: 10.7554/eLife.50226 (PMC6768663; doi:10.7554/eLife.50226)
Supplement: Figure 5—source data 1. [file elife-50226-fig5-data1.xlsx]

## Sheet: Fig 5A
Figure 5A
Average Distribution and Intensity of P-CADHERIN and PHALLOIDIN
P-CADHERIN	E14.5 shScramble
	Embryo 1															Embryo 2															Embryo 3
Cell position (Bin)	Cell 1	Cell 2	Cell 3	Cell 4	Cell 5	Cell 6	Cell 7	Cell 8	Cell 9	Cell 10	Cell 11	Cell 12	Cell 13	Cell 14	Cell 15	Cell 16	Cell 17	Cell 18	Cell 19	Cell 20	Cell 21	Cell 22	Cell 23	Cell 24	Cell 25	Cell 26	Cell 27	Cell 28	Cell 29	Cell 30	Cell 31	Cell 32	Cell 33	Cell 34	Cell 35	Cell 36	Cell 37	Cell 38	Cell 39	Cell 40	Cell 41	Cell 42	Cell 43	Cell 44	Cell 45	Cell 46	Cell 47	Cell 48	Cell 49
1	15.7429	48.8571	90.3375	43.1667	24.8542	74.4524	26.8364	25.8846	70.0128	49.5	49.5	42.8038	22.6224	11.8571	51.5	11.44	44.4167	24.4285	72.6	35.0167	72.875	22.2333	17.8572	39.25	34.1309	34.5741	37.5333	61.0938	35.8889	74.6667	65.8731	43.75	61.2231	26.45	27.8571	45.7826	21.3517	53.7293	30.0929	63.3786	29.9	48.1111	19.1607	63.6856	65.5179	17.4706	62.8016	64.2556	56.5179
2	12.5286	15.2679	38.1125	32.9286	10.6458	56.0238	26.6364	43.7051	62.5512	87	87	37.7355	42.3556	14.6572	52.6875	5.28	44.65	74.6428	52.8666	31.0166	22.9167	30.58	19.7143	7.30357	19.8929	37.4074	65.5667	64.375	37.6389	64.6167	80.9364	57.25	51.0307	31.6667	30.6857	29.5072	12.914	59.1881	32.4429	39.4083	21.2	25.1111	22.9554	98.5047	95.3927	28.7255	72.0397	33.5188	17.8571
3	8.4	11.2679	11.9375	24.9464	8	16.0595	7.43638	35.2949	19.1153	31.3125	31.3125	15.1468	18.5112	7.02856	39.0833	7.96	18.1167	51.25	10.9002	14.3333	20.5833	12.14	17.4286	11.5714	9.85713	17.5185	29.7667	33.25	16.8611	13.0833	30.127	28.8083	32.3776	19.4167	37.9714	20.2826	20.3126	21.2857	24.4857	16.5167	10.2833	16.1666	10.1964	36.8857	40.4197	16.3627	14.8096	9.0902	9.80357
4	8.65714	12.4286	10.725	22.9728	5.0625	9.04286	3.96364	15.2436	6.88467	6.3125	6.3125	10.598	15.4444	7.51428	16.0625	7.12	13.1333	12.107	6.2334	6.76666	22.7083	7.12	8.82142	12.8929	7.2262	15.2963	10.4333	15.4062	7.13332	9.06667	12.0372	32.6417	29.4899	7.46667	10.4714	8.75362	23.8281	20.6841	15.2643	9.31667	9.19998	10.1481	8.78125	6.36186	33.1145	6.08823	24.8333	4.66917	5.96429
5	6.92856	11.8214	9	20.517	6.41667	11.2857	5.47272	12.1025	6.99967	11.5	11.5	8.97067	24.6112	6.4857	15.875	6.08	14.6667	5.14275	3.2668	5.81668	18.2917	9.28	11.2381	9.71429	9.80953	16.4259	10.1667	11.625	6.33334	6.55	10.5	25.35	25.5306	6.13333	6.34284	9.06958	9.7265	9.43629	8.68571	7.45	11.7333	6.94445	7.72917	4.778	23.2502	5.40195	9.41062	4.57893	4.53571
6	6.30002	10.8958	9	12.2109	7.83333	7.58572	6.36364	10.5	6.15383	12.8125	12.8125	9.9215	18.6945	8.48572	12.0938	6.4	5.68333	9.85725	5.5002	7.10417	15.2222	9.82	6.8095	6.73214	7.5238	6.0222	9.43333	10.375	7.96666	6.38	12.7223	23.0583	11.2857	4.88	6.07145	7.46958	4.5	5.89471	6.41429	9.25	8.41665	6.31482	7.36458	5.1445	8.06267	5.16667	5.9375	9.27193	5.75
7	5.94286	24.0417	5.07143	9.12244	9.6875	6.85714	6.90908	8.28205	4.677	5.625	5.625	5.99033	18	9.39998	8.125	5	6.55	6.32125	7.5	4.89583	7.61113	11.42	14.7143	10.4583	6.82858	6.06666	8.96667	12.3438	6.26668	5.86	15.3518	24.3667	9.95914	4.94	5.33927	8.5826	3.92188	8.48114	10.0643	7.95	6.60417	6.20002	6.79167	5.97783	4.0625	5.4804	4.875	11.2193	4.8125
8	5.81428	16.0625	8.48571	12.4762	5.125	8.05714	5.03638	16.0641	5.7846	7.625	7.625	6.88233	20.639	12.9143	6.34375	8.76	5.66667	4.095	8.9165	8.0625	6.1111	6.16	12.9048	9.02083	6.2857	4.8889	4.8	8.375	4.03332	6.78	8.62967	25.55	11.6123	3.14	4.67855	8.0261	3.40214	7.26317	9.88571	5.95833	4.89583	6.42222	9.3125	5.39983	5.32317	6.01962	6.3125	8.1842	5.20833
9	5.92858	15.9792	7.5	17.4558	6.15	12.4143	5.2909	16	7.3538	8.4375	8.4375	6.84317	10.472	8.94284	8	6.64	5.05	6.238	8.625	7.3125	6.8889	7.8	7.90477	17.9792	6.2	7.62222	8.5	7.46875	5.1	5.68	5.48167	26.4333	10.7449	4.18	4.64285	9.09566	4.52686	6.68433	10.925	5.21667	6.35415	6.6889	8.22917	5.81117	4.86467	5.91177	10.3661	6.36842	4.32292
10	7.92858	13.6875	7.64286	21.1225	4.975	16.0429	9.65456	14.8846	8.1846	5.33333	5.33333	4.27467	10.6943	9.5357	6.29167	9.2	4.2	6.95267	16.7915	5.04167	9.1111	5.94	8.28573	14.2083	8.25716	11.5778	9.76667	5.08333	6.33332	6.02	6.18517	25.4333	7.57129	4.6	4.08927	10.5391	5.33057	6.20167	9.13333	4.775	7.16667	6.42222	7.42708	5.21133	4.54167	4.55882	7.74113	8.5	3.33333
11	7.53573	20.8333	6.75714	28.6327	4.125	13.6857	12.9636	13.6923	9.7078	5.58333	5.58333	4.3294	13.9165	11	4.375	6.52	4.44	6.90467	10.5418	5.66667	10.6111	5.58	7.57143	18.125	7.18572	6.3333	8.36	7.75	4.33334	4.48	7.926	24.7	7.62243	3.02	4.26785	9.77392	3.848	6.19283	8.38333	4.04167	2.85415	7.4889	7.19792	5.5555	6.20817	6.43138	7.51775	5.45613	5.09375
12	10.2571	14.7708	4.9	43.4014	6.325	9.0857	12.9273	9.17948	8.1846	5	5	6.392	18.8888	10.8857	4.8125	17.76	3.7	7.524	13.1668	5.54165	8.3889	6.78	6.80953	10.3542	7.64286	4.95556	14.2667	5.25	5.7	9.32	6.94433	23.85	10.6734	3.44	4.41075	9.03478	4.83914	4.6055	8.75	6.28333	6.66665	6.08888	5.71875	6.12217	8.47917	5.96077	5.49087	3.61403	5.27083
13	16.8572	13.4167	9.08571	22.0952	5.35	14.1572	8.25454	8.84617	5.769	6.3125	6.3125	7.11783	13.667	10.0286	6.5625	24.44	5	5.28567	6.00025	5.52083	9.1111	4.56	5.04763	7.875	5.8	4.24446	7.53333	6.25	8.33332	6.26	6.75933	8.14167	5.06129	4.38	6.2857	10.5478	4.20312	4.5	7.71429	4.69167	4.33335	5.46664	4.625	8.82217	4.698	6.34313	5.42863	5.70175	4.1875
14	25.0143	12.9375	11.3143	23.8163	8.89583	6.80002	7.6	8.60257	6.769	8.125	8.125	5.81367	14.25	11.2571	10.5625	22.2	4.81667	8.1785	7.54175	4.8125	9.05557	5.6	4.33333	8.02083	5.42858	3.31112	5.4	4.4375	19.4333	7.86	6.7965	5.09167	6.24486	4.78	6.4643	12.2	5.46075	5.18814	5.25	5.31667	2.875	8.04446	7.29167	8.24433	4.58333	6.97058	6.1875	4.39473	3.67708
15	25.4571	15.0208	7.3	21.7551	7.3125	10.8714	5.4	5.96153	7.5385	11	11	6.65683	13.861	9.4857	14.4062	22.72	6.23333	8.357	4.3998	5.60417	9.7222	7.44	4.09523	7.54167	5.17858	4.75556	6.56667	3.5	9.86664	10.75	7.94433	4.45833	10.9797	6.46	8.85715	13.1043	3.867	6.79671	3.52143	5.05	4.7292	8.9815	8.17708	7.2555	4.23933	4.7255	7.91962	6.28947	5.72917
16	26.4429	9.67857	7.44286	24.4762	5.875	7.44286	7.54546	8.23075	6.00017	12.1875	12.1875	6.941	10.5	18.6857	22.4062	16.6	4.45	15.2858	5.8998	6.875	7.08335	12.42	4.57143	6.875	8.35715	6.05555	9.1	5.4375	12.7333	10.05	7.74083	4.18333	24.9081	8.83333	10.7857	10.0087	3.8985	6.27057	4.99286	6.51667	5.84998	16.6852	18.6667	8.289	5.43767	6.4706	15.134	7.36842	9.52083
17	23.7571	17.8393	7.275	34.068	5.60417	6.77144	8.92728	14.0385	6.91017	14.3125	14.3125	11.1862	12.3055	9.25716	25.1562	15.76	5.28333	23.7142	12.2998	8.28332	5.79167	9.32	5.61907	8.39286	10.5714	6.05557	9.23333	5.125	17.4666	7.35	5.963	4.28333	22.398	9.53333	8.22858	14.9652	3.367	8.91743	4.82857	7.08333	6.01668	26.5371	14.2188	8.28571	6.76033	8.09802	14.1588	5.29323	14.9375
18	24.4857	10.0714	8.8	46.585	4.22917	9.21428	32.8727	13.5385	33.4742	24.9375	24.9375	27.0685	15.5998	17	20.0625	48.92	11.25	39.5355	32.2668	10.5833	3.45832	12.32	20.3572	12.6964	30.2143	12.3148	29.5667	7.40625	13.8333	9.2	10.6666	8.31667	14.5	12.45	10.8286	16.942	4.8985	8.10529	4.41429	11.5833	12.3167	29.1481	21.1429	13.7714	9.73214	10.6863	12.5952	14.8195	22.625
19	34.8857	22.5357	10.775	66.7619	4.72917	9.2262	48.9454	24.5	85.5642	35.25	35.25	51.2745	58.111	37	42.2188	37.4	17.8333	94.8572	27.9002	15.2667	15.0833	47.28	55.9643	15.3214	35.0476	15.5926	30.7667	20.5	33.75	24.0333	46.8254	8.58571	24.7346	33.7167	32.1143	27.1449	18.7188	30.1279	18.5357	22.525	23.2667	26.5556	34.8125	47.7619	38.634	34.9608	47.2698	26.7293	43.25
20	37.9429	73.5893	49.325	81.6012	19.7708	21.9048	38	54.8333	84.1922	10.9375	10.9375	116.647	105.489	37.2857	63.375	47.96	38.9833	51.7858	51.3666	35.15	23.6667	63.0167	55.9286	35.6964	52.9048	44	15.2667	33.7812	36.6944	37.35	71.1269	15.2143	86.2449	44.45	53.6	43.7971	78.0001	30.827	47.6357	23.0083	47.1167	38.2963	50.2232	55.5619	31.4997	36.7549	32.2066	20.7744	38.5536
PHALLOIDIN	E14.5 shScramble
	Embryo 1																				Embryo 2																				Embryo 3
Cell position (Bin)	Cell 1	Cell 2	Cell 3	Cell 4	Cell 5	Cell 6	Cell 7	Cell 8	Cell 9	Cell 10	Cell 11	Cell 12	Cell 13	Cell 14	Cell 15	Cell 16	Cell 17	Cell 18	Cell 19	Cell 20	Cell 21	Cell 22	Cell 23	Cell 24	Cell 25	Cell 26	Cell 27	Cell 28	Cell 29	Cell 30	Cell 31	Cell 32	Cell 33	Cell 34	Cell 35	Cell 36	Cell 37	Cell 38	Cell 39	Cell 40	Cell 41	Cell 42	Cell 43	Cell 44	Cell 45	Cell 46	Cell 47	Cell 48	Cell 49
1	32.0156	102.3	86.8485	95.4723	26.75	90.68	61.7614	81.3622	129.507	60.794	111	147.062	57.2083	114.733	85.5278	41.8053	101	51.7273	41.3077	34.3056	53.2946	24.1667	56.7619	36.575	43.8389	45.9333	32.7857	29.2262	36.1467	38.5909	34.5476	24.5158	46.8034	37.9375	19.5278	35.1429	18.2639	39.9653	36.5625	24.9608	19.9545	14.875	20.853	10.4583	25.381	23.4725	17.875	46.6929	37.6593
2	32.8438	72.05	92.1212	114.722	22.4423	80.4802	77.25	55.7748	56.4934	70.4705	71.0555	110.688	114.792	80.1333	109.556	54.9443	56.0625	29.2091	24.7033	34.3334	29.4821	14.0794	45.2976	26.9937	50.3944	72.4222	40.2738	34.25	39.8695	51.25	24.8492	35.5158	54.6923	36.5209	30.5648	53.3132	24.8056	41.5278	53.6531	25.0294	20.0364	20.85	22.8824	21.9445	35.2619	24.1648	29.1667	50.9143	28.2857
3	28.4167	35.95	61.9394	55.5	20.9615	59.1334	43.4545	40.0998	25.0534	54.0735	61.9168	53.9375	149	48.8333	94.1667	25.639	28.3958	24.4909	21.1319	21.0486	22.5417	14.2222	34.4048	17.9143	22.7222	55.5778	25.7381	24.8095	33.375	31.7349	22	27.4316	41.375	23.1875	28.2037	37.478	23.9583	29.8681	30.0816	21.8	16.1636	25.1375	15.6079	12.125	34	15.0879	19.3333	44.2417	22.4231
4	18.1667	31.4833	50.0303	31.4813	18.9038	55.1	24.7614	46.7374	23.0134	28.765	54.3058	39.4062	96.0833	33.28	77.1296	20.1667	26.4375	18	16.9011	19.9028	23.6042	14.746	23.3809	15.6286	21.7778	37.7111	14.6429	21.9167	24.8152	19.303	21.5159	18.8632	24.4423	16.8333	15.6667	35.6868	22.2222	24.9583	33.551	18.5491	18.3636	22.0625	8.70587	7.10417	24.4286	16.2418	16.7083	40.0167	13.5
5	12.9583	27.5165	48.7273	26.333	18.827	53.6335	21.3977	29.8124	18.52	25.7647	37.4447	22.125	51.6667	27.56	65.4815	18.9443	27.8542	14.4205	18.5495	20.3333	26.9896	13.8651	22.4405	14.9357	18.6778	20.5556	13.7619	22.75	22.528	22.0341	22.754	17.9368	19.5385	15.6667	14.463	22.6209	21.6806	20.7778	23.1429	17.0588	16.2	17.6125	7.64703	5.41667	16.3571	11.6373	10.3958	34.9667	10.9066
6	13.0833	27.7832	47.1818	26.074	18.0769	44.8165	22.5114	18.1405	19.6665	22.0443	39.5558	17.6875	31.875	25.22	47.7778	17.9443	28.75	14.625	28.6154	20.4861	26.9271	13.3413	20.8095	12.7786	19.8062	18	16.4167	27.0357	24.559	22.3788	20.373	17.2632	16.3173	15.6875	14.0185	20.956	23.1528	20.9167	25.9796	15.4588	14.7455	14.1	8.7451	4.33333	11.9762	7.61537	7.35	18.9	12.0384
7	13.1875	32.4502	32.7879	22.963	18.1923	35.4	19.3864	16.1405	19.4503	21.6765	41.0558	17.375	26.5625	22.64	44.1667	17.8333	29.5	16.0227	27.1539	17.3333	21.9062	13.4762	18.9702	11.2571	19.65	17.6111	15.9167	18.5476	25.882	21.6288	20.1508	15.7579	15.4519	16.375	14.8148	20.0824	22.0417	20.5417	18.7041	16.2353	14.5455	8.575	10.2745	2.8611	10.6429	6.84613	8.2	16.6667	15.2949
8	12.7917	32.0168	27.1818	26.926	19.25	25.1833	19.9886	15.6626	18.7665	20.794	39.2497	17.875	18	20.08	37.0556	16.25	31.4167	19.4546	19.033	14.8333	17.25	13.746	17.4653	12.2286	19.675	15.8445	16.2381	21.6111	27.2547	17.9924	21.4352	15.6105	15.875	16	13.5648	17.6648	21.6167	21.2431	15.1939	16.4941	12.7636	7.0125	6.2549	3.1389	12.6072	5.53845	10.05	13.4333	14.359
9	17.0625	29.3665	27.2425	23.9997	17.6731	22.8167	18.3636	21.3	21.2667	19.456	40.7777	14.7083	18.375	14.72	29.7222	16.5	26.6875	23.5682	16.1209	15.6833	20.1979	14.8796	17.6181	11.7286	22.6438	17.0667	17.9286	26.0278	27.677	16.4015	22.3889	14.8158	11.7884	15.25	14.0222	20.9615	17.55	20.6736	15.7041	16.6706	8.9091	5.4875	4.7353	2.58337	11.9286	5.46155	8.925	13.5833	14.8718
10	18.4792	33.311	19.4091	24.3333	18.0577	17.8665	19.6364	19.6126	22.6167	20.2353	38.5923	14.625	15.1875	13.88	31.8518	17.333	29.0625	23.4886	19.7051	17.1	16.6667	15.6019	19.125	13.4429	30.1313	17.9333	13.4167	22.5278	23.1056	17.013	23.1667	15.6184	13.2692	13.5555	13.3472	24.2179	16.8833	21.1328	16.6429	17.6353	9.2909	6.7625	3.78433	2.86113	11.5	4.57692	11.625	13.55	12.6987
11	25.4375	28.05	18.9546	17.963	21.6923	18.35	20.5758	23.2374	21.917	21.49	32.7777	13.2917	12.125	14.06	27.3704	17.25	30.1875	21.4546	18.0897	18.4	17.5833	14.5278	19.5903	16.3	31.725	18.0267	14.3809	20.3194	22.882	17.8874	21.7222	19.5395	18.1635	14.5555	13.2444	23.8846	17.1833	22.8984	14.3572	16.4	9.43638	9.6875	3	3.97223	10.0358	5.91027	12.85	14.55	11.9423
12	26.3958	25.8833	18.5152	19.0555	27.3846	18.4668	23.3485	24.625	17.5835	16.6077	29.389	12.1667	15.1875	13.74	27.9074	17.208	26.9375	19.9773	20.1923	18.2416	18.5833	13.9908	19.5972	15.8857	25.625	19.44	12.1786	20.0833	18.8509	18.9437	21.463	19.8289	18.0192	14.6944	15.4	21.1154	22.1833	25.6875	14.8061	16.1176	8.14544	10.0625	2.92157	5.33337	13.0715	6.56412	9.45	14.1917	10.0513
13	26.125	23.6335	15.3333	18.2223	29.5385	19.7	28.7954	28.1752	15.2498	15.7647	31.75	12.125	13.6875	9.96	25.9444	16.111	28.1875	19.1591	26.2198	17.3167	16.8229	15.5952	22.875	15.2929	22.0312	17.8333	12.2262	19.6944	17.3416	19.5	24.1111	23.4211	14.6442	14.2778	17.8426	18.6319	24.1167	25.5156	15.2143	16.5412	8.99998	6.75	2.90197	5.66667	14.3572	8.12822	13.425	13.4667	9.52565
14	25.4583	26.5832	20.2121	20.6667	35	22.45	32.25	25.35	18.3	18.0443	25.0832	12.5	16.8125	10.28	28.8519	18.1667	31.8125	17.9659	39.1978	17.5917	17.3229	20.873	26.6736	14.2429	19.6	15.5778	12.5595	20.125	17.0683	19.0833	22.2222	24.0211	16.3846	15.3333	17.7407	18.022	22.5	25.0903	17.9796	16.5882	7.14544	5.7875	3.82353	6.80557	15.7143	10.9359	13.925	14.75	8.5513
15	31.8125	35.4335	23.1818	25.4073	50.2116	17.367	31.8068	22.7002	21.7866	24.4262	22.7778	12.6875	19.375	11.42	28.8704	20.25	26.7083	18.4091	42.2308	15.7917	16.9896	27.5238	24.8333	14.6	20.4722	14.4333	16.0834	16.9762	17.5652	19.8371	26.1746	26.4947	20.5096	17.3333	18.6482	21.6978	21.8056	21.6944	19.7143	15.5647	7.23638	4.975	2.50983	10.2778	15.7143	11.9872	21.1	19.2	7.63187
16	37.0625	44.3832	30.9394	25.2967	54.3269	28.2333	32.7045	20.5124	20.0134	27.0295	23.0832	10.8438	18.25	14.22	32.8889	21.0277	31.2292	16.5455	37.7802	18.2431	18.7083	33.746	25.25	16.5143	28.8833	15.8222	16.9405	16.7857	20.5901	20.2007	40.9127	36.5789	21.2308	19.2708	20.787	25.0549	26.875	23.225	20.449	15.0235	7.14546	4.95	3.82353	13.5	15.1429	11.282	20.075	21.0083	9.18131
17	39.8125	62	44.8182	25.6293	53.6346	38.4532	34.6478	23.1248	19.6136	31.0145	35.8055	13.0312	22.4583	20.12	38.5741	25.6667	51.5417	20.2954	34.0128	18.7847	20.8542	40.5556	29.6369	19.4357	33.9556	17.5556	23.0972	20.9643	22.9402	26.2576	46.2619	46.0632	25.0289	17.5625	27.4444	24.7637	24.9444	24.6719	22.2959	19.5059	10.6364	4.725	5.01963	18.7292	13	16.4286	25.2083	22.325	11.2967
18	47.0208	87.1335	50.9091	23.972	66.75	54.2534	50.8409	36.9002	30.2132	46.0588	61.111	24.7812	30.875	31.45	56.4259	48.8053	54.5208	36.6705	34.978	22.6319	19.8958	48.5873	34.9643	17.8857	36.2611	20.9111	33.9643	37.7976	23.962	25.9015	61.1759	39.2526	19.7885	20.1875	42.8704	24.022	28.9861	27.3681	22.6735	45.6824	21.2545	9.4625	7.43137	28.2292	12.1429	18.1758	36.1458	26.7833	19.5055
19	87.8281	73.3	82.2727	22.889	75.3846	135.787	80.2614	85.25	50.9866	88.9262	139.555	39.625	72.6667	64.2167	62.3195	117.584	48.5417	72.8727	39.5604	34.0903	26.8571	61.8492	54.5893	19.7063	39.65	25.4444	44.1309	57.4524	31.9185	34.7348	80.6746	44.8947	31.9519	29.375	53	35.7638	51.625	32.4792	29.0268	49.753	31.4697	15.5625	14.1765	27.625	17.881	25.1758	49.5625	36.5857	35.3626
20	81.4062	56.2167	98.9091	27.1945	105.288	160.44	97.7576	102.2	102.307	112.162	143.833	42.0625	66.75	69.0833	69.3055	63.4167	74.5417	48.2909	45.2637	61.6667	30.4554	56.0238	60.5536	28.1313	48.3	24.6111	33.7381	61.4643	39.587	38.7765	78.3968	45.6632	37.0513	26.5833	55.3889	32.6759	40.5278	49.3889	26.7946	35.5098	38.6061	16.5625	19.1618	24.125	20.3572	30.6593	47.9167	54.3714	32.6923
P-CADHERIN	E14.5 shRhou-505
	Embryo 1																				Embryo 2																				Embryo 3
Cell position (Bin)	Cell 1	Cell 2	Cell 3	Cell 4	Cell 5	Cell 6	Cell 7	Cell 8	Cell 9	Cell 10	Cell 11	Cell 12	Cell 13	Cell 14	Cell 15	Cell 16	Cell 17	Cell 18	Cell 19	Cell 20	Cell 21	Cell 22	Cell 23	Cell 24	Cell 25	Cell 26	Cell 27	Cell 28	Cell 29	Cell 30	Cell 31	Cell 32	Cell 33	Cell 34	Cell 35	Cell 36	Cell 37	Cell 38	Cell 39	Cell 40	Cell 41	Cell 42	Cell 43	Cell 44	Cell 45	Cell 46	Cell 47	Cell 48	Cell 49
1	15.6114	41.1964	63.5714	51.7111	14.3333	28.3562	33.31	33.8195	51.1917	34.8316	44.6297	16.8718	45.345	41.6579	28.3444	44.5938	14.3571	61.935	32.8603	32.3507	44.0938	13.4621	20	25.3147	28.3281	37.8182	14.3571	39.1905	12.1944	15.7426	38.0917	26.3438	8.375	48.0595	53.6857	13.8846	16.746	29.9887	11.8333	29.5	20.8571	11.0555	41.2857	26.7846	40.6049	71.8286	59.9451	22.1	34.5083
2	27.7086	61.3035	27.1905	47.3333	59.7037	18.075	17.2857	28.8889	21.3417	19.979	47.9723	34.2981	92.5789	30.7018	49.0945	33.825	65.8125	29.2467	30.0515	27.7792	34.1548	15.303	25.5455	13.8491	53.125	28.2727	25.2857	41.7024	50.5555	25.6471	14.7	18.3594	19.3583	21.1548	24.8714	31.641	14.873	25.7401	29.9	22.0833	29.3929	19.9778	20.0758	44.5231	11.2654	23.5	40.6154	50.32	39.1833
3	10.5	39.6905	10.6786	21.2667	38.3334	8.5625	11.3286	15.9306	58.9306	40.7947	52.898	11.9664	32.9802	53.0175	35.7778	42.4097	20.375	16.9091	20.8603	21.2987	7.70833	12.6212	28.6768	8.40086	35.5469	9.33767	19.6786	18.1786	27.2361	24.8603	9.21668	37.0938	38.3	17.631	17.6571	8.67948	12.4921	7.29871	30.7833	6.1875	55.0357	32.0667	19.3788	30.0308	7.33336	12.9167	71.3718	47.02	21.9167
4	12.1933	8.52977	8.96429	13.6	15.2778	8.91667	11.1	12.9444	38.3333	18.1316	43.4444	29.9473	10.25	35.0234	8.51112	56.9722	41.5417	17.4026	11.6324	12.3507	10.0833	10.0152	11.7677	6.00863	23.9531	4.5909	21.5357	11.3571	14.7917	18.7227	6.725	35.75	18.4667	19.1428	25.7429	8.96153	8.1111	10.013	11.35	9.3125	46	17.6333	10.7121	40.7539	5.87501	7.65	54.3205	15.38	20.4917
5	8.2	5.79166	8.13096	8.71112	9.90742	10.7188	22.4667	8.69444	25.5833	13.2339	33.0741	24.1056	10.8159	11.0468	7.64445	26.0556	70.9583	16.8702	10.8823	11.1169	18.2604	11.8409	14.101	9.40087	25.375	7.04546	36.4286	7.2143	12.75	8.83196	6.77499	18.4375	11.5083	21.9762	25.5	9.23077	2.96298	12.0519	7.20833	16.2708	11.9286	9.3111	24.5151	45.0923	5.2639	7.93333	24.9744	14.52	20.1333
6	10.3067	8.14286	12.7143	11.6444	7.98148	10.5625	20.4429	5.97221	17.8565	10.3743	43.6354	15.226	8.82888	11.1696	7.68334	11.9514	25.2708	28.6363	12.1681	16	16.8437	10.9727	6.17171	6.63793	18.2143	8.3409	24.3214	7.24675	8.98334	8.6975	6.43332	8.25	11.4583	16.9643	23.3429	5.98462	5.53703	14.5454	9.97917	11.3542	7.92857	19.7333	32.7121	38.4923	6.99305	10.9667	15.4487	10.6	22.9167
7	12.0533	9.25	7.72619	13.9778	8.24075	10.375	6.5	9.36111	20.1528	10.6316	30.0104	6.29312	10.1909	7.70174	8.83334	11.0833	38.7708	23.8051	13.1008	11.2879	13.8646	7.1909	7.11111	7.65084	15.8214	8.98485	9.5	7.07793	5.95	8.31934	6.98094	9.125	11.3417	17.9047	12.4429	7.64616	4.25928	15.87	12.3958	12.3542	9.60714	15.0533	17.1667	27.7846	7.02778	7.91667	23.1923	17.025	10.1667
8	10.6733	11.2143	9.54761	9.48888	6.98147	13.8611	8.04286	10.8472	17.9167	10.538	19.3021	5.97588	16.2171	11.7134	12.1111	28.1528	21.7292	13.4676	10.9243	9.27273	8.02084	8.12726	6.62626	7.12932	14	8.01515	6.82143	5.48054	6.05	5.89077	5.45716	4.29688	9.05	23.5952	13.1429	7.26154	3.75927	19.1299	6.72917	14.1667	11.0833	8.8	8.51513	13.1923	7.29166	5.86667	17	22.725	13.4167
9	7.81333	10.8194	7.36904	6.62224	6.88888	9.5	5.88571	5.87303	7.98611	10.4444	18.1459	6.33188	13.9145	13.6667	20.9938	31.1111	47.7292	17.457	9.52103	10.3939	15.2381	8.15454	9.44318	6.00493	7.625	6.28028	11.3571	4.74025	5.43332	6.9832	8.70476	5.3125	12.7	24.8929	7.7	9.47692	8.12962	26.4416	11.0833	15.8542	10.0833	14.3067	5.48485	13.3077	8.23611	6.61667	9.46153	25.85	14.8
10	8.55333	8.60713	9.85716	9.7111	7.48147	8.21875	5.11429	6.46031	5.71297	10.6082	17.2812	5.70675	30.6251	10.117	19.9136	9.68056	54	19.7571	7.36136	13	13.1191	6.43636	7.01139	6.23647	7.83929	5.19698	8.45833	8.22079	4.68334	6.17647	6.95237	6.71429	14.73	40.5	5.21667	6.73846	7.90742	10.9479	6.33333	9.425	6.375	9.62666	7.28787	12.9808	8.40276	15.8	8.82052	20.3	4.67591
11	11.2267	9.99404	7.99999	8.97778	7.49998	8.34722	5.45714	8.14287	7.79168	9.74269	12.3541	6.2115	45.309	15.7544	22.7901	11.0069	43.375	17.5428	9.06724	16.8182	11.2619	6.96366	10.5758	6.14777	11.75	7.40152	10.7857	6.0909	7.06666	7.62186	5.55239	9.21429	9.95	34.0238	6.66667	11.0769	10.0741	7.117	7.45833	8.275	10.7917	6.69334	5.0909	17.1731	11.7431	18	15.4102	14.7	8.36111
12	6.016	16.5417	9.2381	9.75556	6.53703	8.63889	5.61429	9.38096	9	9.57896	10.8855	9.96637	27.4409	12.5906	21.7778	11.6736	61.0833	20.857	9.94117	8.0909	8.09523	9.57272	14.4949	6.2463	13.4464	5.56817	4.53571	5.06494	5.9667	9.58823	9.03809	25.375	10.98	22.4762	4.31667	10.7231	18.7778	7.32486	9.97917	7.8125	7.95833	11.4666	6.09092	15.7308	16.375	12.45	11.2436	15.125	8.71297
13	6.9	11	12.9286	7.93334	5.83333	8.22222	5.45714	8.25396	6.97684	16.4152	10.8957	7.12038	28.0395	11.1287	11.8519	15.4861	63.6875	21.4805	6.59664	9.51517	12.0104	21.8545	11.3636	9.63546	11.3214	5.87122	7.46429	8.7792	6.33332	7.58824	8.21906	22.9531	14.32	22.0833	5.48571	12.8769	11.7408	13.0779	13.6042	7.60417	14	10.1867	6.40908	28.3539	20.6389	22.85	10.7949	16.925	10.725
14	8.24	14.9464	10.9643	10.1334	6.6852	10.6181	4.64286	17.2917	9.11112	13.6667	9.26037	6.99525	25.467	12.6725	10.8457	8.34722	57.4792	22.3375	6.31373	10.0757	10.3125	28.2	7.90909	10.5388	31.4821	7.10603	10.75	12.9091	19.0167	5.94959	9.34286	9.71875	12.82	16.8809	8.14286	10.2923	13.7408	11.7403	14.4583	8.35417	9.07143	13.52	8.22727	27.1385	16.5556	9.8	13.2436	16.625	14.6917
15	11	14.0297	12.0238	7.33334	8.85182	11.2083	6.17143	23.1111	28.0695	18.0409	6.9585	6.66825	21.2368	20.0877	12.3389	10.5347	37.8958	16.5195	13.7563	8.01515	12.5208	24.5727	15.4141	6.2974	37.625	13.1439	19.3929	8.73811	34.7833	7.45377	21.3083	10.2969	15.0167	24.8333	12.2714	16.1077	9.90742	14.7014	17.8542	7.4375	7.92857	8.85334	9.16665	25.7692	16.2014	13.9833	10.718	16.6	10.1583
16	12.1267	10.5893	11.5476	11.7556	9.35185	10.625	6.37143	17.2361	26.8657	17.9942	10.0207	6.95675	31.1119	21.5731	9.42224	16.4722	24.875	25.5195	11.1691	5.09093	31.8021	18.6212	11.9394	7.24569	36.8929	30.7045	31.3929	10.75	36.65	6.40337	35.95	14.3281	27.8583	20.9524	20.2714	17.3077	13.4259	9.40243	11.75	7.70833	9.71429	5.75555	8.92425	36	9.65972	7.75	13.359	12.975	9.50835
17	13.9867	12.5	16.0595	11.1333	12.3889	12.2875	5.72857	17.4306	21.0046	16.1421	14.5463	9.09613	18.0261	33.1287	11.6333	26.8264	13.3393	24.8312	17.2941	10.8831	30.8125	6.87878	22.1616	9.5474	35.9531	30.1883	31.7143	6.54762	30.1389	5.53783	22.825	20.4688	40.9917	16.3691	33.2143	12.0257	10.1667	8.80514	13.8167	17.6042	10.9643	10.0556	11.0455	22.2154	29.4305	6.95	10.5897	10.7	9.52501
18	6.66667	21.7321	14.5595	54.5556	36.7407	12.0062	6.67143	10.6805	41.9583	14.5895	9.45356	21.3606	12.9146	41.0468	33.3833	51.1181	15.5357	29.3506	16.3897	16.6883	22.375	17.7727	14.0909	9.1207	30.7344	25.4675	54.9286	20.6786	27.25	7.26049	17.7417	11.25	52.0417	25.8809	48.3714	14.3077	10.2407	70.9739	21.8667	28.25	33.5714	10.7444	11.5455	19.0615	37.4583	14.4333	6.10255	34.22	7.68334
19	18.14	21.875	40.2738	41.1778	43.2037	42.6562	11.2143	10.875	20.4917	30.6474	28.8148	54.3419	27.5066	11.6842	61.1889	55.7687	16.9286	23.4026	54.0294	35.013	23.9792	32.0909	27.6162	18.9397	26.9531	23.5844	21.9286	31.4167	31.5417	22.8162	20.6083	41.7812	43.5667	38.7857	69.4571	12.8461	26.7143	67.7141	29.95	12.3333	38.7857	32.1889	30.1212	24.7692	37.2778	42.3667	23.4615	35.62	19.625
20	34.12	38.1012	32.9333	14.7222	13.1667	26.7125	12.5	13.0694	48.575	43.7684	70.0741	66.9572	43.1169	12.1947	27.8833	64.0187	57.25	52.1037	24.0809	26	35.7292	24.4394	41.7475	47.0862	20.8125	38.7857	35.2857	17.2143	36.0833	53.8676	16.8833	27.2031	37.8667	43.2262	67.1	16.7308	25.0794	22.1949	12.9833	12.3542	14.0357	14.0222	7.84414	42.1231	21.1852	33.9	18.2436	31.06	39.275
PHALLOIDIN	E14.5 shRhou-505
	Embryo 1																				Embryo 2																				Embryo 3
Cell position (Bin)	Cell 1	Cell 2	Cell 3	Cell 4	Cell 5	Cell 6	Cell 7	Cell 8	Cell 9	Cell 10	Cell 11	Cell 12	Cell 13	Cell 14	Cell 15	Cell 16	Cell 17	Cell 18	Cell 19	Cell 20	Cell 21	Cell 22	Cell 23	Cell 24	Cell 25	Cell 26	Cell 27	Cell 28	Cell 29	Cell 30	Cell 31	Cell 32	Cell 33	Cell 34	Cell 35	Cell 36	Cell 37	Cell 38	Cell 39	Cell 40	Cell 41	Cell 42	Cell 43	Cell 44	Cell 45	Cell 46	Cell 47	Cell 48	Cell 49
1	35.8222	53.4375	47.2967	25.3333	32.3334	26.0278	8.51112	17.3857	21.9398	19.8571	12.4286	33.6714	30.7431	19.6043	20.4753	45.1961	38.3571	24.2273	43.1905	31.6806	35.7619	52.3929	32.9692	31.625	27.3928	50.7955	59.5543	43.4575	52.7667	25.1667	51.4375	59.1042	37.7	52.7778	38.4048	33.7738	16.0111	76.9762	27.827	20.1818	48.0391	23.7679	24.8052	41.7792	19.9643	66.5123	43.7083	21.73	43.3409
2	32.8445	53.4375	47.4231	24.2353	40.6429	24.5185	14.88	17.4143	15.6767	31.7403	22.5429	38.1286	31.5664	13.9813	28.0062	39.7059	30.5286	37.4318	25.9444	16.6435	17.9643	45.4714	40.9692	28.006	32.4286	37.6364	50.7371	44.7574	48.5889	23.9417	52.1459	54.8959	21.6375	43.5111	48.2619	48.2976	14.0444	47.3333	19.4615	26.5	46.3984	31.4464	40.697	44.013	18.6547	69.4691	43.7083	21.1	36.7424
3	19.9556	30.5104	39.1667	23.9059	33.1905	31.9444	22.04	14.1714	19.6541	20.1688	29.0714	44.2429	28.4727	13.262	38.7222	39.0882	24.2714	46.8409	19.9815	20.0886	14.7143	41.2143	52.6538	34.2738	36.6072	31.7159	44.5486	42.1177	31.9111	26.7333	54.1667	55.4167	23.625	44.3111	35.0238	45.4821	28.7667	44.8571	20.7692	27.7046	39.3571	30	36.1515	46.7662	23.1786	61.2654	35.7917	21.56	27.0227
4	14.3111	21.4062	33.0256	17.5294	26.0238	26.6667	20.44	8.22856	25.6842	13.7532	20.4143	22.9571	21.5195	14.5829	17.1173	36.7549	13.6571	26.4773	16.6482	13.4792	21.2976	30.4143	59.0577	32.8452	30.0893	27.9432	39.28	25.6323	26.5778	23.6333	58.1666	52.5416	27.4625	36.0111	30.4	44.4694	29.9556	37.9714	22.5577	30.1818	35.2321	30.125	23.9697	55.2467	13.1528	57.4444	33.475	20.05	19.3031
5	16.4	19.2604	29.5385	14.8	23.0238	20.5556	14.5067	7.72858	28.2331	17.026	14.5143	22.0286	20.0742	13.1658	10.9198	27.8726	11.9833	14.9545	18.0556	14.1615	26.5357	20.2071	54.6346	28.0655	23.1072	20.5909	32.8457	29.1103	36.0444	19.1917	52.3646	38.9791	29.9875	25.8889	27.9143	36.1667	32.1667	44.7143	22.1538	22.7273	29.5625	19.5833	17.697	45.1818	7.56943	34.2963	28.225	20.23	15.5273
6	16.4	18.5312	28.7692	14.1059	17.6905	13.7408	16.2533	9.6143	26.1729	17.1818	12.1286	16.4	21.3711	13.4144	7.86111	33.549	13.5833	15.8409	21.5371	15.5365	15.3214	16.4841	43.8653	32.7738	24.8214	23.0152	31.0171	19.3603	43.525	14.8167	41.0278	32.1875	28.175	21.1222	34.5286	27.625	34.1667	43.6857	20.1346	17.0909	23.8571	16.2083	13.5152	35.6624	11.9444	28.7847	26.4	23.26	18.2455
7	18.2444	20.0312	14.8846	13.2706	14.8333	8.51853	14.32	13.0429	30.2932	17.7879	13.0143	16.4714	21.539	15.1176	9.63194	35.4804	17.6833	12.6818	24.4629	17.1823	13.7639	10.0873	38.4038	32.8869	25.4464	26.8939	30.8914	22.0809	44.8	11.5833	30.0972	30.6111	26.575	23.3889	34.6714	25.4167	31.9444	45.6572	22.3462	15.9091	27.5804	15.6042	9.07577	37	15.3889	17.9722	38.64	21.79	22.7909
8	18.6222	16.0119	9.83332	12.2706	13.4047	9.51852	11.9866	12.3714	28.6466	18.2424	10.15	12.75	22.0703	13.9206	10.6181	27.7549	16.44	19.2727	20.4815	17.1823	11.4305	13.8333	30.1346	30.4822	23	29.6818	32.4571	20.8456	42.1667	10.5334	29.6528	31.5	29.4875	25.5278	35.1714	32.4762	25.5467	49.1429	22.0256	17.0303	28.6875	18.4375	6.5303	31.0649	16.7917	19.4028	33.07	21.29	22.2
9	12.8889	13.7619	9.23076	12.6353	10.7857	10.2037	9.62668	14.4571	21.7631	21.197	10.2333	9.56667	21.8125	17.0029	8.76389	20.8137	23.2667	19.0455	16.6111	19.5261	23.125	15.8492	32.1731	39.0893	28.6071	30.8333	32.92	19.0221	43.0625	10.3958	28.9306	37.9167	32.8125	26.2361	34.3143	37.0297	24.4666	49.7143	23.0513	15.8788	20.0089	21.5625	5.7879	33.8572	15.4861	26.8542	32.29	21.99	16.9909
10	15.8056	16.5952	8.2923	13.3177	13.1191	10.4444	11.08	12.1071	16.1579	23.0909	7.68333	10.8667	22.2539	20.347	7.53471	20.6353	23.5167	18.8788	19.2037	20.0365	12.6528	15.6191	27.6346	41.3125	29.2857	23.7121	33.8133	23.9485	49.5625	10.8542	26.3472	33.8333	35.8125	25.4722	38.7714	26.25	24.5467	48.7429	19.4359	15	12.75	24.8125	5.5909	32.5195	12.5	26.5833	37.67	25.6875	22.0909
11	10.0833	17.4167	7.18462	13.8	14.2381	13.2037	11.5866	11.8714	15.8246	21.0909	11.6	11.0833	25.2031	15.8029	7.13195	20.1569	25.5167	17.3637	17.6852	18.1302	9.47222	17.4683	24.2308	26.9444	30.3095	19.7273	35.4733	29.7132	50.3	13.4271	21.6945	36.6111	37.375	30.7222	44.8571	20.5476	26.64	49.1714	17.359	12.2727	12.4821	31.25	7.72725	30.9091	16.6944	21.6458	40.46	32.2	19.0546
12	13.1667	15.4762	6.86156	14.4941	12.619	14.6111	11.3333	8.75712	15.3948	19.5757	11.5833	7.23333	25.875	12.0147	5.7361	20.1177	24.4667	20.3182	16.5926	15.2083	12.0833	14.5803	20.7115	27.7917	26.7381	18.5	35.22	37.5588	31.125	13.3958	25.125	33.8055	35.35	36.1667	34.6857	14.125	32.3467	72.9143	21.6154	12.5758	10.6161	24.4792	12.0909	26.0519	25.5	18.7778	32.95	25.85	14.7364
13	10.5556	15.75	7.78207	15.1647	11.2857	13.1852	12.7733	8.07142	19.0827	20.2727	15.5714	7.92857	31.2695	13.5029	6.79166	20.7549	17.5833	17.4545	19.7037	23.9219	13.2778	11.9286	24.0962	33.0119	23.1072	15.9394	35.7657	36.1765	15.9556	11.7584	24	28.5	34.9	34	32.3	14.8214	28.72	59.2286	19.5897	14.8485	9.52679	18.1458	14.0454	22.3377	32.1666	23.0278	23.39	21	17.2455
14	13.4	18.0833	11.6154	14.3882	11.7381	15	14.9467	13.8143	26.0601	20.987	14.0429	9.95714	27.2617	14.8912	5.1875	20.6863	20.6833	20.1136	21.9074	24.6458	19.2361	12.9286	18.4231	32.3452	22.875	16.9546	44.6686	32.0662	24.7111	13.8083	27.8889	26.1944	38.1125	38.1111	29.7321	21.6667	25.4533	55.6571	15.7692	16.2121	10.6875	19.2292	12.7879	22.1558	26.8472	23.75	23.23	21.21	19.9
15	17.3778	27.7604	13.1923	17.6118	12.4524	21.9444	14.4133	20.5286	24.2481	19.1364	10.3429	11.9571	24.1875	15.1872	5.24999	27.7843	17.9167	24.2727	28.1852	20.9688	21.1071	18.0429	16.9231	34.7798	21.9643	19.3182	33.5943	27.3382	13.6556	17.5417	27.5139	28.4167	38	46.2	24.6429	15.9583	25.8667	46.8572	17.9231	14.4242	12.0714	19.375	17.4545	19.6493	16.7639	22.5208	27.04	24.44	19.4818
16	17.5111	26.2292	13.9359	22.4353	19.3809	34.8704	13.1067	19.9572	15.8421	16.5974	9.6	14.0571	29.9805	16.8663	6.54322	25.7647	19.1833	30.8864	26.2778	20.5521	24.9881	25.3929	17.0962	41.5952	18.0178	23.7727	27.1714	34.1912	19.1	28.0917	25.2708	40.6875	31.0875	51.4444	23.7286	13.0536	30.0889	44.1143	17.4872	18.0909	14.3125	16.375	31.3637	18.6753	23.0417	25.9074	30.2	24.56	19.5727
17	19.1778	28.9792	16.7308	26.9765	31.3809	36.1666	11.2267	21.7286	11.9925	21.3896	9.88571	28.3143	37.4805	24.0856	11.2346	34.9314	21.7571	33.0682	29.5185	34.6823	42.2857	31.7143	13.0769	35.9226	17.7143	21.3409	30.1086	34.8529	38.4	26.7417	25.2188	36.5208	23.55	70.6667	29.5119	16.2322	28.1111	42.6286	23.5385	20.3333	22.6607	20.5833	39.5909	23.7792	25.8571	41.679	31.4667	29.37	28.0227
18	18.0889	37.9896	19.8333	29.7765	37.4047	25.8333	13.08	20.0428	13.6541	33.4675	11.0714	21.5714	36.3867	27.623	16.6481	35.2353	17.6429	29.5227	38.0556	51.1042	55.6875	30.8357	14.0769	31.2083	24.8036	27.1364	29.4914	37.6765	64.7556	24.3583	31.8333	51.1875	22.7625	67.4	46.5952	15.2976	28.3333	34.3429	29.5577	24.8485	24.3929	24.5357	39.1364	25.8441	35.5476	40.5	36.6167	33.56	39.7803
19	26.4	32.25	24.782	32.8588	44.3571	30.3333	16.8445	18.1143	22.7143	43.7143	23.4	23.2	36.0859	27.484	26.3889	36.3333	16.8857	38.0227	59.9524	66.7593	66.0357	40.8429	19.6	32.3155	41.3571	41.2045	28.88	39.0294	67.4444	27.6083	35.9167	54.8333	33.8125	53.8111	47.7976	16.8691	57.4	32.4762	38.3077	19.0909	22.8281	29	44.6061	25.2078	28.2738	44.1543	43.85	41.45	52.9166
20	23.6667	43.25	26.1667	36.4216	34.0952	27.5079	29.1778	21.3571	26.421	42.5065	24.2	25.4286	70.8125	25.4652	18.7222	37.0392	18.6286	38.8182	70.5926	72.6111	61.3095	58.9	31.8615	33.8631	49.0179	42.2045	25.6229	32.5229	78.6889	21.25	26.7604	42.9792	30.06	68.9778	68.8214	21.4524	35.2111	39.9524	30.0577	27.8409	33.0391	37.75	48.6234	23.1948	22.5	57.2593	52.0917	44.44	56.8712
P-CADHERIN	E15.5 shScramble
	Embryo 1										Embryo 2										Embryo 3
Cell position (Bin)	Cell 1	Cell 2	Cell 3	Cell 4	Cell 5	Cell 6	Cell 7	Cell 8	Cell 9	Cell 10	Cell 11	Cell 12	Cell 13	Cell 14	Cell 15	Cell 16	Cell 17	Cell 18	Cell 19	Cell 20	Cell 21	Cell 22	Cell 23	Cell 24	Cell 25	Cell 26	Cell 27	Cell 28	Cell 29	Cell 30
1	64.7	40.5834	85.75	85.75	63.5833	49.1667	111.334	74.9	81.8	30	31.5	53.375	35.5238	120.5	44.5	71.1667	114.334	45.5333	45.5333	72.625	39.4167	53.3	76.5	59.8125	69.25	38.8333	45.75	40.875	73.1667	29.625
2	63.2	81.3333	54	54	84.3333	32.2083	46.833	43.2	44.7	49.25	38.3334	55.4167	31.4762	81.8335	53.75	46.9166	41.167	19.2	19.2	150.5	50.75	42.2	54.3334	37.6875	55.3	64.75	55.5	23	56.8333	51.0625
3	24.5	33.4167	31.6667	31.6667	30.25	17.8333	20	25.3	17.8	25.9167	22.3333	20.5	11.5238	33.4165	22	18.5417	19.667	12.45	12.45	60.25	28.9167	14.3	19.1667	19.75	24.9	21.0833	22.875	21.25	18	29.5625
4	21.8	10.5	16	16	17	13.1875	21.3335	18.5	16.8	22.4167	12	23.1667	12.4762	17.5	19.25	13.625	19.6665	14	14	32.25	16.0833	11.6	15.6667	15.8125	16.6	11.8333	19.5	17.1875	18.8333	19.3125
5	19.9	10.6667	12.875	12.875	15.3333	11.75	17.8335	13.2	14.3	21.0833	10.4167	15.5	12.2857	13.5	19.625	12.3333	19.667	11.85	11.85	19.5	13.6667	10.5	14.6667	15.8125	12.65	13	20.25	12.75	16.3333	16.8125
6	13.3	10.75	10.5	10.5	14.25	11.8125	17.167	12.7	12	17.8333	11	11.8333	13.4762	11.333	18.875	12.4167	16	11.15	11.15	15.25	12	9.9	14.1667	14.875	10.6	11.9167	15.5	11.5	15.3333	14.875
7	11.5	10.5	11.625	11.625	13.6667	10.625	15.5	12.6	10.7	15.1667	10.5	10.4583	12.7142	10.167	17	12.4167	18.667	11.55	11.55	13.625	12.1667	9.9	14.8333	13.5	9.8	11.9167	12	10.4375	15	14.3125
8	11	10.8333	10.875	10.875	13.0833	11.3125	14.8335	11.4	10.4	13.375	10.8333	11	12.7143	10.333	18	19.1667	18.333	12.1	12.1	12.625	11.5	10	13	13.5	9.4	12	10.25	10.4375	14	12.75
9	10.6	11.3333	11.125	11.125	13	10.375	13.8335	11.2	10.8	12.5	10.1667	10	12.4286	10.333	17.25	21.2917	16.333	13.45	13.45	10.875	10.5	10.4	12.6667	13.125	9.7	11.3333	11	10.125	15.6667	14
10	10.6	11.1667	10.625	10.625	12.6667	10.5	13.667	11.6	10.8	11.125	10.3333	10.625	11.7143	9.833	14.5	23.4167	18.333	13.3	13.3	10.5	10.8333	10	13.6667	13.125	9.7	10.8333	9.75	10.25	17.3333	14.625
11	10.4	11.1667	11.875	11.875	13.5	9.8125	14.667	11.4	10.6	11.375	9.6667	11.1875	10.5714	11.333	13.75	20.0417	18	15.8	15.8	11.375	10.6667	10.6	12.6667	12.625	10.3	11.3333	10.75	10.875	17	15
12	10	11.1667	12.25	12.25	12.25	9.875	14.5	11.4	10.4	10.25	10.1667	11.4375	11.0715	12	12.75	21.2917	18	17.5	17.5	11.875	11.3333	11	12	13.375	10.4	11.0833	10.5	11.625	15.3333	16
13	11.4	11.1667	11.625	11.625	11.5	10.125	14	11	10.4	10.5	9.8333	11.0625	11.2143	13	14	14.3333	16	19.3	19.3	11.75	11.3333	11.2	13	13.875	9.8	10.75	11	11.9375	15.6667	15.6875
14	11.5	10.9167	12.875	12.875	11.5833	10.375	14.6665	11	10.6	10.75	10.1667	10.8125	13.2857	13	11.25	11.0833	15.667	16.65	16.65	10.875	10.3333	12.4	12	12.875	10.4	11.25	10.5	15.625	18.6667	15.625
15	13.7	10.9167	13	13	12.75	10.25	16.833	10.9	11.3	10.5	10.25	10.6667	13.4286	13.6665	11.5	10.6667	19.667	15.35	15.35	11.25	12	13.8	12.1667	16.125	11.45	11.1667	10.875	14.625	24	16
16	15.8	11.75	19.375	19.375	14.8333	10.4375	18	10	13.7	10	9.75	10.625	12.6667	14.1665	11.5	10.9583	17.667	19.3	19.3	12.625	12.3333	15.9	12.6667	18.125	13.25	12	11.125	15.1875	28	14.5
17	18.4	12.4167	24	24	19.75	10.9583	26.667	11.1	20.3	10.6667	10.5	10.3333	18.3333	17.833	14.75	12.5417	16.8335	16.1	16.1	16.625	14.5833	21.4	13	23.1875	17	16.5833	11.125	18.75	27.8333	13.9375
18	17.6	19.5833	17.25	17.25	18.6667	14.4167	37.1665	20.9	39.2	11.1667	25.3333	11.7917	20.9524	20.3335	40.25	20.4583	19.6665	16.4	16.4	26.25	18.25	27.1	17.8333	28.375	21.8	59.5	16.375	20.9375	24	18.5625
19	26.6	46.6666	19.9167	19.9167	56.4166	22.2083	65.5	46.8	42.4	47.75	62.5	27.4167	22.9048	21.5	90.75	50.8333	38.6665	30.65	30.65	52.375	26.4167	49.5	49.1666	48.375	46.4	61.4166	47.75	35.9375	30.8333	37.75
20	62.7	79.5833	73	73	75.9167	52	83.667	82	36.1	60.5	44.0834	23.7083	31.6191	31.8335	42	80	96.8335	35.1	35.1	97.75	53	71.8	56.1666	75	66.2	36.9167	73.625	66.0625	99	60.9375
PHALLOIDIN	E15.5 shScramble
	Embryo 1										Embryo 2										Embryo 3
Cell position (Bin)	Cell1	Cell 2	Cell 3	Cell 4	Cell 5	Cell 6	Cell 7	Cell 8	Cell 9	Cell 10	Cell 11	Cell 12	Cell 13	Cell 14	Cell 15	Cell 16	Cell 17	Cell 18	Cell 19	Cell 20	Cell 21	Cell 22	Cell 23	Cell 24	Cell 25	Cell 26	Cell 27	Cell 28	Cell 29	Cell 30
1	70.091	51.3667	112.036	112.036	123.85	103.8	53.3889	60.72	37.25	75.8542	52.9375	66.1502	102.886	56	154.927	108.6	86.275	34.639	56.778	35.4	112.188	80.5833	133.227	45.28	60.025	56.4318	56.8036	115.19	93.3666	86.682
2	31.5452	76.7667	49.2855	49.2855	58.2168	45.12	19.6667	45.25	48.1111	86.0625	34.7344	43.9126	98.3928	73.3636	66.5092	47.475	39.275	67.611	44.6667	55.375	155.646	56.65	94.44	42.525	72.0625	104.75	104.661	134.063	75.6334	69.3942
3	13.9818	69.8667	23.143	23.143	27.3	14.64	14.7408	27.25	31.6667	68.1042	20.3906	26.75	36.893	31.0303	19.2726	32.4688	47.5	34.6668	22.7037	38.075	44.1667	35.1167	41.6132	42.8	58.075	72.2045	93.0893	113.821	44.0552	38.6668
4	11.8366	33	18.476	18.476	12.354	9.56	10.6111	20.05	22.6296	35.6458	15.6875	17.9748	29.8215	15.606	12.3636	48.375	46.325	19.7503	12.5183	22.1667	19.975	20.6667	24.6134	37.275	32.175	48.7955	72.7143	70.3894	29.4332	25.6667
5	11.3454	19.7	14.0477	14.0477	10.229	8.76	8.25927	13.25	17.1852	28.2083	13.1719	14.2626	21.8927	12.9394	10.5455	33.3125	33.7	12.6113	10.5927	14.9667	16.775	19.4667	17.2132	26.7	19.0375	48.6815	47	39.358	30.3444	22.788
6	11.0908	13.5667	14.619	14.619	10.3125	10.56	7.77777	13.1	12.5555	26.875	11.5156	11.844	21.9645	10.0303	10.9545	19.9688	20.575	9.97225	9.51833	13.5333	15.875	18.0833	14.7835	23.75	16.875	44.4315	34.1667	39.2105	29.583	21.909
7	11.9998	12.8333	11.1903	11.1903	9.70825	9.96	9.07407	10.9	8.22223	20.7083	12.0312	11.8592	21.107	9.9091	11.841	23.9688	15.925	9.19425	7.926	12	16.85	16.8833	15.05	23.875	16.4688	44.3638	28.0714	35.829	29.986	20.0546
8	13.9093	11.2333	11.4287	11.4287	8.47925	8.92	7.44447	10.65	9.1111	17.8333	10.2656	11.4062	18.8215	10.2121	12.5	21.875	13.075	9.5	7.611	10.1667	16.75	16.72	14.45	20.7	15.3594	29.591	25.1905	42.2895	27.9168	19.491
9	10.8407	8.63333	10.6667	10.6667	8.20825	8.64	6.51853	11.6	9.5926	15.3611	10.125	9.79675	20.9997	8.18183	13.3635	27.3438	11.925	11.5	6.611	10.2	18.15	14.76	14.9835	19.45	17.1094	27.2048	22.119	44.2103	24.639	20.491
10	9.159	8.5	9.238	9.238	8.58325	9	7.74077	10.05	8.48147	15.8611	10.0208	9.95325	20.0712	8.18185	12.318	26.6875	12.4	13.3707	7.722	8.33333	19.775	14.54	15.5832	17.975	16.4531	23.3182	19.6667	42.6185	22.8195	21.3456
11	9.43175	7.3	8.857	8.857	9.25	9.76	7.5926	11.4	8.4074	17	9.4375	9.5315	23.5	9.4091	12.0228	27.7188	11.9667	13.7223	9.1665	9.1	23.45	14.7	17.0665	16.9	17.6562	23.8637	18.119	44.184	19.7778	22.5818
12	10.0683	7.35	9.42867	9.42867	7.97925	8.28	7.96297	8.05	10.037	20.4722	7.72917	9.3905	22.6073	10.0303	11.2045	20.8125	10.2	15.4168	11.111	8.2	21.9	12.46	15.7835	16.1	18.6875	23.25	19	50.3683	22.3472	22.9454
13	8.8865	10.6333	10.619	10.619	8.31275	14.24	8.1852	8.1	7.48147	23.8958	10.7344	10.5155	22.607	10.606	12.2955	15.2812	12.425	14.1113	9.389	8.6	23.55	12.86	16.35	16.675	16.1562	21.1593	19.8809	45.408	19.528	19.0912
14	11.6817	10.0667	12.857	12.857	8.00025	10.52	9	8.7	6.8889	18.6875	9.75	11.0935	21.3927	9.57577	11.8637	14.9062	12.8	13.917	10.4447	11.6	25.725	13.34	18.9	17.875	16.9531	19.25	18.2381	49.8158	19.2918	19.2546
15	17.382	10.8667	11.9523	11.9523	9.14575	14.8	10.5926	7.9	7.96297	18.9375	11.9375	11.031	23.1073	9.45453	12.0228	17.25	12.35	13.2777	11.185	11.4333	25.925	14.0167	21.2934	20.65	17.6125	18.9542	23.4048	44.684	18.986	19.6362
16	27.4366	9.5	17.381	17.381	9.4375	25.36	9	9.95	10.7778	17.0417	14.1562	12.1717	23.3927	10.3333	12.1363	17.625	16.825	17.0278	14.3703	15.4333	30.75	14.6833	27.6402	36.425	18.25	20.1593	23.7857	37.5052	20.7666	17.6
17	33.909	17.8333	31.6187	31.6187	13.5625	40.24	14.5926	11.45	12.8889	20	16.7812	13.2124	29.1073	13.2121	12.1818	19.5625	23.225	19.722	23.0373	24.025	35.6042	15.2667	31.0266	77.975	16.2	20.9093	26.6428	36.2946	28.3888	19.7122
18	36.8184	23.2	47.381	47.381	21.3332	57.36	29	16.1	18.1852	30.5	22.2969	17.7	44.4285	25	18.091	22.25	35.45	28.8612	49.259	40.075	45.6667	24.4333	40.7066	82.325	20.7875	27.7955	41.4643	38.6736	43.0778	23.6665
19	65.6544	62.4667	77.4643	77.4643	32.5832	40.92	45.7037	34	41.8611	41.1875	41.1406	30.175	61.6788	49.0909	36.0364	40.55	73	82.9725	109.222	80.85	91.5625	60.7	45.4134	78.75	55.025	50.8635	63.1607	66.3368	69.1222	50.4395
20	111.473	63.4	61.1073	61.1073	78.5166	53.8	57.7223	60.96	33.3889	39.9167	62	90.0626	51.7145	69.9394	63.6	72.425	104.95	93.8333	126.445	83.525	161.417	134.8	41.2934	70.16	92.475	117.864	70.7321	71.284	121.155	110.454
P-CADHERIN	E15.5 shRhou-505
	Embryo 1										Embryo 2										Embryo 3
Cell position (Bin)	Cell1	Cell 2	Cell 3	Cell 4	Cell 5	Cell 6	Cell 7	Cell 8	Cell 9	Cell 10	Cell 11	Cell 12	Cell 13	Cell 14	Cell 15	Cell 16	Cell 17	Cell 18	Cell 19	Cell 20	Cell 21	Cell 22	Cell 23	Cell 24	Cell 25	Cell 26	Cell 27	Cell 28	Cell 29	Cell 30
1	82	90.148	53.1333	39.4166	50.7778	46.775	29.125	95	34.1253	42.1666	37.5179	47.4167	64.175	42.0357	34	43.5429	43.5429	93.5	81.1333	50.125	39.56	36.5834	38.7916	69.881	50.7222	63.225	69.3889	52.2	127.167	84.4375
2	59.8	90.8517	43.4	35.6667	48.1111	59	40	107	32.208	34.75	23.7143	22.4167	23.875	38.8214	35.5	21.0714	21.0714	29.5625	94.4667	72.9583	32.8	67.9583	47.0556	48.0238	38.3333	33.1667	99.3333	75.2	85.5833	81.4375
3	38.9	28.6293	23.3333	37.3334	33.7778	27.5	42.25	56.75	40.4585	21.2917	13.25	15.9792	19.275	33.6786	27.55	16.8857	16.8857	24.5312	34.9333	101.042	17.25	44.4166	36.2222	36.4762	37.5834	30.1333	55.2778	96.9	20.25	30.1875
4	29.8	11.5553	25.3333	34.5834	36.2222	20.375	33.8125	38.875	32.7085	17.8333	16.3571	14.7708	24.8	15.3809	13.6667	16.8857	16.8857	18.75	30.7333	96.5417	14.05	32.7222	27.3889	29.8333	29.5833	28.8333	26.8889	71.5	14.6667	27.4375
5	25.1	11.037	21.6	32.4166	18.6111	19.0312	38.5	24	33.389	22.3333	15.5536	14	16.35	13.2143	13.4667	16.8714	16.8714	17.25	36.0667	69.3333	14.8	25.5	16.9445	26.2619	22.4167	29.1667	28.9444	25.5	17.9167	25.375
6	21.2	10.963	20.2	38.75	13.7222	21.7812	29.75	17.75	32.5553	20.3333	14.8035	15.9792	15.45	12.6071	14.6	17.7857	17.7857	17.6875	25.9333	43.1667	15.5	22.6111	20.5	22.8333	17.6667	31.4667	24.2222	21.3	25	37.375
7	21.1	11.333	20.0667	38.75	13.4445	29.3125	24.0625	17.5	30.111	29.1111	13.5715	14.625	13.775	13.1428	16.2	15.4429	15.4429	15.7812	22.8	24.7083	15.6	20.9167	20.2222	20.5238	14.75	26.4667	21.2778	16	19.5	31.75
8	21.7	11.5927	20.5	35.6666	16.9444	24.0625	19.1875	17.75	25.6667	23.2222	13.75	17.1945	14.7188	13.7143	13.6667	17.8714	17.8714	14.8333	27.4	32.125	14.95	17.4445	17.6111	22.0714	13.75	20.5667	18.9167	13.7	38.25	34.3125
9	21.5	12.0743	21.1	28.8333	15.7222	26.0938	17.375	21.5	24.7223	14.6111	14.4286	13.5833	15.5312	13.3929	13.0667	24.8	24.8	14.1667	28.6	27.75	14.7	14.0556	19.2778	18.7143	14.6667	16.5333	18.75	13.1	53.5	51.625
10	23.4	11.7777	26.6	24.8333	15.9445	25.5938	15.25	19.75	22.9443	15.6667	16.6905	13.9167	18.4375	13.3333	18.6667	24.4643	24.4643	16.25	27.4	25.75	13.55	14.1111	17.9445	17.3928	14.1667	17.8	17.25	12.4	59.25	29.1667
11	26.4	12.7407	25.7	29.3333	28.7222	20.1562	16.375	17.5	21.7777	14.1111	21.119	13.6389	21.4062	12.0714	25.8667	23.8572	23.8572	17.7083	17.3	20.7083	13.95	14.7222	19.4444	19	16.8333	26.8667	20	13	43.25	24.9167
12	29	12.2593	27.4	47.8333	37.2778	23.4375	17.875	17.25	21.3335	13.4445	16.3809	16.2778	31.0938	13.5715	21.8667	26.5143	26.5143	16.2083	16.9	32.0417	14	20.4445	22.8333	25.7143	18.8333	31.3	16.9167	13.5	43.5	19.8333
13	34.9	11.7037	28.9	45.0834	29.7778	27.5312	19.9375	16	24.7777	15.3333	17.5893	14.3542	29.2188	17.0357	16.6667	32.8714	32.8714	13.25	15.8	24.5	14.25	24.7778	17.9445	19.4286	17.4167	36.1	22.1667	13.4	49.5	19.5
14	35.9	12.1483	30.2	26.8333	23.8889	29.5	28.1875	17.5	20.5557	14.7222	15.5357	14.5208	31.025	18.1072	17.8667	25.1	25.1	12.5938	14	23.2083	15.35	37.3333	18	20.7619	16.0833	33.9667	18.1667	13.5	50.375	19.75
15	31.4	12.222	40.0667	27.75	21.4444	29.5	33.25	24.25	18.3333	18.2917	12.2143	16.6667	29.15	19.75	21.1333	23.2429	23.2429	12.9688	13.7333	24.5417	16.55	29.8889	17.2778	20.2381	27	37.4333	20.2222	16.8	22.8333	16.75
16	30.4	11.9257	48.1333	31.4167	21.3889	27.375	46.1875	22.5	16.778	19.2917	12.1607	20.2917	29.025	26.0714	20	27.8571	27.8571	12.75	14.2667	20.7083	19.15	36	21.2222	18.8809	44.4167	38	51.6667	15.8	20.9167	16.125
17	53.1	13.889	30.4667	30.8333	32.7778	34.6562	61.625	29.25	17.3332	18.0833	15.3214	21.4792	28.9	33.1429	22.4	27.6571	27.6571	14.4688	18.6	24.4167	24.55	49.1667	19.0556	23.1905	43.25	38.7	66.2778	16.6	24.75	41.375
18	57.3	19.5927	52.2	35.5834	57.6111	34.6562	63.0625	54.75	19.2918	14.875	19.6964	30.2083	27.275	24.8572	21.95	27.6	27.6	23.6562	15.1333	30.6667	37.9	33.5834	18.8889	34.8571	53.5834	35.0333	42.3333	25	23.5833	95.875
19	39.3	22.185	39.3333	44.75	42.3333	39.775	93	66.5	34.2085	19.625	34.6071	35	36.65	39.0357	25.1	50.3143	50.3143	51.3125	38.4667	40.3333	47.05	44.9584	25.75	55.5	81.0555	40.8333	51.5	64.1	114.333	162.875
20	36.8	18.5187	55.3333	37	65.4445	63.675	150.812	57.5	104	73.0833	40.625	69.5208	50.25	45.5357	34.35	71.3429	71.3429	101.875	72	60.3125	47.4	33.9583	46.375	88.881	65.9444	95.35	72.7778	74.3	94.9167	135.312
PHALLOIDIN	E15.5 shRhou-505
	Embryo 1										Embryo 2										Embryo 3
Cell position (Bin)	Cell1	Cell 2	Cell 3	Cell 4	Cell 5	Cell 6	Cell 7	Cell 8	Cell 9	Cell 10	Cell 11	Cell 12	Cell 13	Cell 14	Cell 15	Cell 16	Cell 17	Cell 18	Cell 19	Cell 20	Cell 21	Cell 22	Cell 23	Cell 24	Cell 25	Cell 26	Cell 27	Cell 28	Cell 29	Cell 30
1	79	87.9583	91.3529	146.224	60.2812	83.3229	49.3864	76.3195	76.3195	76.3195	76.3195	82.963	51.7857	72.3187	50.8929	92.0866	97.4352	72.65	149.01	85.7619	73.3125	63.35	109.189	55.425	90.2222	78.1	58.0175	33.311	47.1408	69.3485
2	75.6493	123.146	84.3412	88.4167	94.9688	52.6354	63.392	74.1528	72.0952	74.1528	74.1528	66.8889	58.9286	73.9121	58.9524	104.154	70.0333	55.7357	89.3137	70.9169	45.8959	20.625	66.9888	41.9875	89.6444	53.44	33.5877	20.1112	101.077	51.0757
3	30.3247	98.625	60.8353	38.7857	87.1094	42.3542	73.0966	56.9167	56.9167	56.9167	56.9167	54.9111	77.7	62.1868	62.8691	65.4904	56.8778	33.8286	60.804	43.5236	41.2916	14.275	39.0112	19.6625	78.3222	17.92	23.9298	12.1222	45.9382	18.8333
4	16.9091	60.3542	34.8706	32.25	45.5312	42.5	79.1989	41.625	41.625	41.625	41.625	55.8889	55.8857	47.4616	48.4048	54.4231	51.4667	28.6917	51.094	45.4644	79.0208	12.8125	41.2222	14.1375	37.0222	14.95	15.8772	12.0444	20.9846	12.4091
5	14.7792	45.8958	27.1882	31.1547	44.1875	33.9	71.7159	43.9444	43.9444	43.9444	43.9444	56.4	64.1571	47.2949	41.7381	65.6923	49.7222	28.325	51.1648	39.107	62.1389	10	40.6554	13.65	22.9667	12.1	14.2456	11.4002	27.7692	14.6212
6	16.4156	30.3542	21.1882	30.9527	48.4062	27.85	57.6591	46.9365	46.9365	46.9365	46.9365	48.5333	54.6833	42.6154	38.9167	43.4712	43.7444	27.0333	49.0704	28.25	42.75	12.3438	30.5446	11.55	21.4333	12.55	14.1053	12.2332	14.5848	16.6667
7	17.6234	26.6875	16.75	34.6785	26.0781	27.6	51.0057	39.1852	38.3016	38.3016	38.3016	51.9111	39.3333	41.4744	36.7738	35.7596	44.4778	29.95	46.9294	28.6388	33.6667	9.78125	21.5695	11.0781	20.3444	11.6	15.8509	12.6888	14.031	14.3182
8	18.3788	24.6458	16.9559	32.4525	18.5	24.75	36.6307	35.3174	35.3174	35.3174	35.3174	49.5556	40.65	45.141	44.5595	33.3407	33.9444	31.1167	42.6706	32.1248	23.4167	10.1562	19.5555	11	20.6944	12.75	15.8859	12.6527	14.3538	12.0303
9	20.5757	26.95	16.8823	28.7618	15.1719	21.9	28.0114	31.0953	31.0953	31.0953	31.0953	50.8889	35.35	40.4744	49.9762	36.0659	30.4	30.5167	45.5176	35.75	16.3055	10.4062	19.5835	12.0312	19.1806	11.7	18.6106	13.014	14.8306	12.303
10	19.9243	27.55	16.8382	28.5357	15.8393	21.3875	23.7857	25.9206	25.9206	25.9206	25.9206	40.1556	30.7167	36.359	54.2714	32.967	29.4222	43.2667	45.7058	42.7502	17.0555	12.5312	18.4447	10.9375	17.3194	10.875	17.4649	11.5137	13.0002	13.7454
11	17.1667	27.925	19	27.893	16.6875	19.25	20.6023	23.3016	23.3016	23.3016	23.3016	37.6889	35.6667	34.9102	54.7	37.7582	34.1444	52.375	45.2704	48.5002	18.6944	10.7188	14.8332	9.5625	16.9722	11.075	16.6842	11.097	13.723	13.3182
12	16	28.7	16.7353	33.1787	16.2969	19.425	19.2443	21.5079	21.5079	21.5079	21.5079	48.6	44.45	39.6538	50.1667	29.8132	33.8556	36.175	47.953	61.1807	17.0833	12.4688	12.6248	10.1562	15.4028	10.25	17.9386	11.0693	18.0924	13.2273
13	16.7143	36.3333	21.6618	29.8095	16.3438	21.075	20.6477	20.6482	20.2857	20.2857	20.2857	54.5778	48.6833	44.3205	54.2381	33.4945	32.1333	31.1	46.847	66.986	15.3055	10.8125	12.639	11.4062	15.8222	12.275	17.1579	11.389	17.1384	14.0909
14	16.2727	42.3125	27.6177	31.9762	17.5469	25.2125	22.7159	17.873	17.873	17.873	17.873	42.7111	48.9167	38.2436	66.0119	41.2404	36.0334	31.0917	46.1178	63.0553	15.8889	15	13.7777	12.6406	19.7333	9.525	16.5438	10.2558	18.0308	16.5
15	17.8052	51.3542	37.2588	31.762	16.6094	29.5375	22.0966	15.8413	15.8413	15.8413	15.8413	43.0667	48.4833	37.7692	86.6548	43.9327	39.5778	28.875	44.5646	56.8195	16.4444	18.9062	14.0444	13.8	18.2222	10.95	18.1579	11.2778	18.2768	18.2121
16	19	41.2083	38.9294	33.9523	19.4844	29.5625	23.767	16.8194	16.8194	16.8194	16.8194	53.4444	48.6667	38.2564	93.7976	37.6731	43.1222	30.6833	42.5882	48.1784	19.2222	17.8438	16.7334	12.9375	18.8111	12.125	17.4035	12.1334	20.4308	24.2424
17	22.4675	64.9167	28.5647	38.2498	18.2188	25.0938	30.7614	19.7917	19.7917	19.7917	19.7917	55.2	53.3429	54.2308	87.8809	31.2981	42.3222	41.2917	37.4315	56.0951	25.3333	23.1562	19.611	17.7625	17.5777	13.95	20.5175	23.6886	20.969	28.0454
18	32.8182	127.729	39.6	65.25	33.4844	38.625	61.6307	24.6806	24.6806	24.6806	24.6806	69.4667	52.5429	48.2308	94.8095	46.5385	44.3444	45.8167	36.814	49.9049	34.5	29.225	24.6888	28.5375	21.7778	28	36.6579	36.3334	25.5538	36.6818
19	58.8182	103.667	59.1059	90.9167	78.7656	70.9167	67.9489	41.625	41.625	41.625	41.625	78.3556	73.4571	66.2857	115.798	64.1154	66.4333	53.8714	51.0392	59.5596	57.9792	70.25	44.2554	45.575	44.0444	50.64	79.2807	78.0552	50.554	49.0909
20	89.7662	104.292	53.2	64.3264	115.016	65.0104	61.8977	62.0417	62.0417	62.0417	62.0417	86.3778	74.5286	113.033	97.8929	58	61.6778	73.7643	92.294	142.405	86.8125	161.65	85.0002	78.8375	41.5778	57.38	74.9649	72.8334	49.477	55.7424
[truncated: 11 more columns]

## Sheet: Fig 5B
Figure 5B
Average Basal Cell Area (um2)
Replicate	E14.5 Control	E14.5 shRhou-505	E15.5 Control	E15.5 shRhou-505
	Average cell area per embryo/um2	Average cell area per embryo/um2	Average cell area per embryo/um2	Average cell area per embryo/um2
Embryo 1	127.968	163.553	76.8591	127.48
Embryo 2	180.687	183.793	99.6419	96.1562
Embryo 3	152.739	185.492	111.16	144.395
Embryo 4	105.061	169.873	144.443	158.29
Embryo 5	130.92	151.463	104.393	125.696
Embryo 6	116.413	200.186	84.2129	150.539
Embryo 7		227.036		127.722
Average Basal Cell Height (um)
Replicate	E15.5 shScramble	E15.5 shRhou-505	E16.5 shScramble	E16.5 shRhou-505
	Average basal cell height per embryo (um)	Average basal cell height per embryo (um)	Average basal cell height per embryo (um)	Average basal cell height per embryo (um)
Embryo 1	4.7373	4.17385	6.40017	4.48733
Embryo 2	3.96611	2.48963	6.13804	5.15611
Embryo 3	4.23321	2.91405	7.34105	5.25667
Embryo 4	5.52169	4.02095	7.68963	3.816
Embryo 5	5.85864	4.405
Average Basal Cell Density (Basal cell per mm22)
Replicate	E14.5 shScramble	E15.5 shRhou-505	E16.5 shScramble	E16.5 shRhou-505
	Average number of cells/mm2/per embryo	Average number of cells/mm2/per embryo	Average number of cells/mm2/per embryo	Average number of cells/mm2/per embryo
Embryo 1	8566.01	3198.53	11544.9	7330.53
Embryo 2	5315.32	2827.88	9087.66	8058.09
Embryo 3	3967.27	3239.71	10103.5	6575.51
Embryo 4	6314.69	5344.61	9543.94	7185.32
Embryo 5	6781.43	4887.02	7483.88	3719.55
Embryo 6	9444.58	4129.84
Embryo 7	8979.57
