# Supplementary material for: An RNAi screen unravels the complexities of Rho GTPase networks in skin morphogenesis
Source: eLife. 2019 Sep 25;8:e50226. doi: 10.7554/eLife.50226 (PMC6768663; doi:10.7554/eLife.50226)
Supplement: Figure 6—source data 1. [file elife-50226-fig6-data1.xlsx]

## Sheet: Fig 6F
Figure 6F Quantification of PAK2 and MLC2 phosphorylation when RHOU is overexpressed
	Empty vector	Myc-Rhou
	normalized intensity	normalized intensity
Replicates	pPAK2/PAK2	pPAK2/PAK2
1	1	1.37236
2	1	1.18568
3	1	1.31306
	Empty vector	Myc-Rhou
	normalized intensity	normalized intensity
Replicates	pMLC2/MLC2	pMLC2/MLC2
1	1	0.238378
2	1	0.90453
3	1	0.231835

## Sheet: Fig 6G
Figure 6G Quantification of PAK2 and MLC2 phosphorylation when RHOU is depleted
	shScramble	shRhou-504	shRhou-505
	normalized intensity	normalized intensity	normalized intensity
Replicates	pPAK2/PAK2	pPAK2/PAK2	pPAK2/PAK2
1	1	0.821615	0.167268
2	1	0.360352	0.399341
3	1	0.543678	0.239935
	shScramble	shRhou-504	shRhou-505
	normalized intensity	normalized intensity	normalized intensity
Replicates	pMLC2/MLC2	pMLC2/MLC2	pMLC2/MLC2
1	1	2.34058	6.47817
2	1	1.37661	1.47479
3	1	1.72223	2.54381
4	1	3.22178	3.49297

## Sheet: Fig 6K
Figure 6K Quantification of hair follicle waves in PAK2 and ARHGEF7 depleted tissues
	shScramble					shPak2-209
	Embryo 1	Embryo 2	Embryo 3	Embryo 4	Embryo 5	Embryo 1	Embryo 2	Embryo 3	Embryo 4	Embryo 5
	Number/mm2					Number/mm2
Hair placode	25.6055	32.1799	22.1453	28.3737	37.0242	38.7543	22.8374	24.5675	8.99654	17.6471
Hair germ	9.68858	14.8789	12.8028	16.955	16.609	18.6851	9.68858	11.7647	4.15225	4.49827
Hair peg	9.34256	13.8408	9.68858	19.3772	22.1453	27.6817	10.0346	14.8789	4.84429	9.34256
	shScramble				shArhgef7-966
	Embryo 1	Embryo 2	Embryo 3	Embryo 4	Embryo 1	Embryo 2	Embryo 3	Embryo 4
	Number/mm2				Number/mm2
Hair placode	25.2595	28.3737	26.6436	32.1799	24.2215	12.1107	30.1038	33.564
Hair germ	7.95848	22.1453	7.95848	9.34256	8.99654	4.49827	8.3045	10.3806
Hair peg	8.65052	22.1453	8.99654	8.65052	8.99654	5.19031	9.34256	9.68858
