# Supplementary material for: An RNAi screen unravels the complexities of Rho GTPase networks in skin morphogenesis
Source: eLife. 2019 Sep 25;8:e50226. doi: 10.7554/eLife.50226 (PMC6768663; doi:10.7554/eLife.50226)
Supplement: Figure 7—source data 1. [file elife-50226-fig7-data1.xlsx]

## Sheet: Fig 7B
Figure 7B Quantification of the average hair peg length
	Control	shRhou-505	Myc-Rhou
Replicate	length (um)	length (um)	length (um)
Peg 1	118.74	108.85	70.09
Peg 2	103.99	112.55	66.81
Peg 3	95.96	73.74	58.03
Peg 4	115.07	115.99	81.11
Peg 5	84.51	102.45	67.7
Peg 6	98.67	55.93	41.83
Peg 7	108.42	96.62	64.67
Peg 8	80.78	79.43	78.82
Peg 9	46.18	53.56	70.99
Peg 10	93.69	95.39	51.64
Peg 11	99.4	58.29	42.11
Peg 12	105.45	86.4	65.91
Peg 13	79.92	76.18	65.91
Peg 14	145.16	69.37	91.75
Peg 15	78.21	89.51	91.39
Peg 16	68.06	68.14	70.09
Peg 17	93.05	114.51	66.81
Peg 18	79.69	113.05	58.03
Peg 19	72.78	73.78	81.11
Peg 20	164.29	77.55	67.7
Peg 21	62.41	86.71	41.83
Peg 22	106.27	95.77	64.67
Peg 23	103.99	97.64	78.82
Peg 24	102.75	109.27	70.99
Peg 25	126.77	106.59	51.64
Peg 26	112.84	108.85	42.11
Peg 27	102.95	123.82	65.91
Peg 28	104.22	107.83	65.91
Peg 29	88.97	113.77	91.75
Peg 30	111.88	113.05	91.39
Peg 31	107.73	116.2	46.18
Peg 32	83.8	105.34	76.82
Peg 33	117.14	107.27	63.5
Peg 34	90.57	97.64	70.09
Peg 35	121.16	108.85	64.06
Peg 36	69.23	126.13	73.8
Peg 37		66.4	100.72
Peg 38		86.4	83.26
Peg 39		69.76	85.39
Peg 40		78.48	78.1
Peg 41		86.72	91.39
Peg 42		93.64	75.09
Peg 43		81.45	64.81
Peg 44		85.83	64.62
Peg 45		60.52	68.54
Peg 46		71.83	93.82
Peg 47		67.75	53.85
Peg 48		89.21	107.28
Peg 49		85.93	99.19
Peg 50		73.12	78.33
Peg 51		77.88
Peg 52		84.17
Peg 53		66.79
Peg 54		158.8
Peg 55		122.87
Peg 56		100.22
Peg 57		124.66
Peg 58		166.94

## Sheet: Fig 7D
Figure 7D Placode cell shape analysis when RHOU expression is sustained in the hair follicle
	Placode area			Number of cells/placode						Placode cell area
	Control	Myc-Rhou			Control	Myc-Rhou				Control Placode Cell Apex	Control Placode Cell Middle	Control Placode Cell Bottom	Myc-Rhou Placode Cell Apex	Myc-Rhou Placode Cell Middle	Myc-Rhou Placode Cell Bottom
Replicate	Placode area (um2)	Placode area (um2)		Replicate	Number of cells/placode	Number of cells/placode			Replicate	Placode cell area (um2)	Placode cell area (um2)	Placode cell area (um2)	Placode cell area (um2)	Placode cell area (um2)	Placode cell area (um2)
Placode 1	1481.25	2018.5		Placode 1	35	81			1	61.899	72.5976	6.73872	33.4107	31.3309	24.8567
Placode 2	1401.7	2174.28		Placode 2	37	53			2	68.5682	67.5262	61.6211	34.0984	19.607	67.9619
Placode 3	1005.92	2706.86		Placode 3	52	58			3	45.6427	41.4744	13.8943	22.0725	30.5929	31.0458
Placode 4	1409.35	2569.72		Placode 4	70	50			4	59.7454	50.2278	62.8716	34.6686	43.34	19.5567
Placode 5	1464.61	1698.28		Placode 5	54	69			5	57.7307	58.1475	93.9253	38.1741	26.0308	46.9125
Placode 6	975.46	1757.53		Placode 6	49	74			6	1.4589	39.3208	60.2317	32.0186	40.757	47.7847
Placode 7	1112.44	1699.61		Placode 7	47	74			7	41.1271	40.7102	2.01467	44.4134	31.3141	11.4556
Placode 8	1308.16	2002.85		Placode 8	55	54			8	51.9646	25.9823	86.2834	29.0163	20.1101	58.6197
Placode 9	1226.94	1694.95		Placode 9	31	61			9	44.1838	86.2834	94.2726	44.6482	78.0589	74.7883
Placode 10	1512.21	1699.44		Placode 10	63	56			10	29.178	38.0008	43.8364	23.2466	30.7271	31.9515
Placode 11	1247.58	2007.68		Placode 11	42	35			11	40.0155	27.1633	30.0811	30.6768	26.1818	31.8341
Placode 12	1095.46	1957.25		Placode 12	52	32			12	28.2054	32.0958	4.23775	42.9542	29.6033	48.0027
Placode 13	1228.27	2074.25		Placode 13		22			13	2.22308	32.9294	45.8511	26.6849	13.9547	17.4769
Placode 14	1295.35	1282.36		Placode 14		38			14	35.222	26.1212	79.5447	46.0236	25.947	40.3042
Placode 15	2483.84	1489.41		Placode 15		46			15	97.2599	34.8746	141.722	10.5163	49.8309	46.1577
Placode 16	2023.82	1747.38		Placode 16		46			16	30.9148	24.4539	52.7982	30.2072	18.349	56.0199
Placode 17	2202.9	1362.09		Placode 17		50			17	33.6241	64.5389	48.5605	27.3558	36.5807	66.8717
Placode 18	2223.87	1977.89		Placode 18		38			18	39.8071	31.4705	23.9676	37.7044	34.1822	82.2688
Placode 19	2329.39	1860.72		Placode 19		46			19	35.9862	38.765	84.5467	45.4868	35.2389	42.7529
Placode 20	1931.29	1651.18		Placode 20		36			20	26.5381	34.5967	32.5821	13.2838	29.8046	40.0693
Placode 21	2028.15	1687.46							21	32.3737	85.6582	31.1926	20.3617	57.2946	33.8635
Placode 22	1572.96	1591.26							22	30.6369	46.7542	1.38943	44.296	43.4909	68.8844
Placode 23	2461.54	1894.34							23	33.9715	37.0282	43.6975	84.9356	47.8685	59.3744
Placode 24	2588.36	1721.25							24	72.5976	32.9294	44.6006	79.8536	28.1609	48.3885
Placode 25	2764.12	2156.47							25	32.86	50.853	69.7493	21.7035	26.2992	25.7289
Placode 26	2572.38	1801.14							26	59.3285	28.2054	40.9186	41.2602	39.7507	22.1732
Placode 27	2382.65	1822.44							27	30.9842	41.8218	45.7816	80.038	29.4188	60.6156
Placode 28	2243.51	1563.47							28	35.7778	50.3667	37.5145	46.1074	64.5068	29.2008
Placode 29	2030.65	1863.38							29	38.5566	32.0958	43.8364	24.6555	89.0952	26.7185
Placode 30	1599.75	1439.98							30	78.9889	38.1398	71.9029	57.8817	76.9016	24.2362
Placode 31	1752.2	1846.74							31	42.6554	38.765	25.0792	74.4193	51.5081	82.6881
Placode 32	1743.55	1656.34							32	58.4949	92.7443	51.6867	37.7212	45.99	49.6464
Placode 33	1737.56	1977.89							33	48.0742	35.7778	60.0233	43.9773	41.5621	59.7937
Placode 34	1931.12	1864.71							34	33.4852	30.4979	7.78079	42.7529	79.6355	29.3518
Placode 35	1699.44	2327.06							35	35.6388	70.8608	67.0399	18.4329	28.0771	40.0693
Placode 36	1715.76	1730.57							36	32.1652	51.2699	2.22308	84.6672	53.0009	60.6156
Placode 37	1694.95	1383.39							37	74.3344	47.2405	152.906	24.9406	26.2321	63.5172
Placode 38	1181.67	1702.44							38	59.6759	31.4011	142.972	15.3635	45.6713	14.3069
Placode 39	1120.43	1241.26							39	26.8159	38.6261	82.532	55.0807	34.8531	48.2878
Placode 40		1699.44							40	34.8052	59.398	62.5242	108.602	18.5503	116.267
Placode 41		1878.36							41	46.2679	28.4833	1.73678	22.2738	35.6246	36.7316
Placode 42		1652.34							42	63.2884	43.1417	13.8248	82.621	16.7557	27.5907
Placode 43		1401.7							43	50.7836	57.1055	7.15555	36.7987	36.0943	21.2507
Placode 44		1070.83							44	42.0996	41.0576	65.9978	19.7244	81.5811	30.8277
Placode 45		922.7							45	33.0684	50.6446	49.0468	78.9143	19.8082	45.7049
Placode 46		1142.39							46	46.6848	33.3463	10.2818	102.01	36.413	55.5335
Placode 47		1963.24							47	58.6338	30.5674	46.129	13.7031	29.7543	43.0548
Placode 48		1888.01							48	45.0869	44.0448	8.47551	37.8889	27.5571	10.6337
Placode 49		1252.91							49	36.8893	41.0576	17.1594	24.0517	63.6682	29.0499
									50	59.398	16.3952	32.7905	24.6555	31.0458	22.7266
									51	32.3737	18.4099	20.9804	15.8164	61.0852	67.1904
									52	36.5419	59.9538	7.08608	25.9973	21.67	51.005
									53	43.4891	52.5204	85.6582	11.6065	57.5462	17.6781
									54	45.99	65.0947	4.93247	37.4696	86.2438	30.7103
									55	38.6261	51.7562	7.01661	25.058	34.1654	29.3014
									56	43.4891	45.2259	1.80626	11.2878	51.9107	36.6478
									57	57.036	2.08414	8.75339	24.7561	51.0553	54.5272
									58	75.5848	26.6075	3.95987	14.5249	49.9315	53.4034
									59	42.3775	56.4108	1.80626	30.3413	81.4134	40.1532
									60	56.4108	7.08608	14.7974	11.1704	19.607	73.6478
									61	7.08608	40.8492	1.87573	15.1791	33.6287	36.3459
									62	40.8492	39.0429	1.80626	24.2529	30.1736	33.4275
									63	39.0429	62.3853	5.62718	20.2276	13.1664	34.8363
									64	62.3853	47.1016	1.73678	38.0566	24.0014	45.1849
									65	47.1016	35.9167	1.80626	41.126	51.9442	33.4442
									66	35.9167	22.2308	148.391	27.6074	28.2783	16.1854
									67	22.2308	50.0889	3.61251	14.9778	39.1469	15.2126
									68	50.0889	40.2239	77.1132	64.641	15.3132	84.9021
									69	40.2239	30.6369	4.51564	18.0807	14.8771	18.131
									70	30.6369	36.1946	11.1849	37.7715	58.0829	29.1673
									71	36.1946	2.15361	18.2015	53.6886	21.519	29.3518
									72	2.15361	30.7063	1.66731	83.9293	61.8567	21.1333
									73	30.7063	57.3139	84.7551	37.3019	18.0304	112.476
									74	57.3139	29.3169	1.73678	78.4447	33.9642	33.5281
									75	29.3169	43.2807	83.5046	21.6868	29.7878	37.7044
									76	43.2807	72.1808	12.0185	28.9157	28.6641	30.442
									77	72.1808	36.6114	30.359	13.8876	20.7307	41.495
									78	36.6114	57.3139	57.8697	23.1795	56.1709	25.5947
									79	57.3139	50.7141	33.3463	37	28.0938	34.3667
									80	50.7141	2.29256	53.8403	24.9742	37.0335	35.524
									81	2.29256	38.765	78.5721	71.5009	26.4166	21.7706
									82	38.765	52.7288	63.4274	56.674	46.9125	24.471
									83	52.7288	87.3255	42.3775	42.5517	21.2842	49.2774
									84	87.3255	45.7816	38.9734	18.1142	40.0023	41.4279
									85	45.7816	25.4265	100.803	21.0494	40.908	31.6496
									86	25.4265	33.3463	6.32189	44.4134	54.5607	41.1763
									87	33.3463	64.0526	3.68198	11.9755	40.0358	13.0825
									88	64.0526	36.6114	3.19568	69.874	28.4628	22.9615
									89	36.6114	30.4979	56.8971	30.8613	27.2217	17.1079
									90	30.4979	26.1212	75.9322	12.6967	36.8323	14.9107
									91	26.1212	48.3521	43.3501	24.8567	21.4016	45.5707
									92	48.3521	45.2259	11.4628	25.9805	32.5888	36.3962
									93	45.2259	42.9333	36.403	59.5254	32.9914	31.8508
									94	42.9333	47.5879	49.0468	12.7638	13.4515	53.6886
									95	47.5879	56.5497	165.62	47.9859	33.6455	27.6745
									96	56.5497	73.2228	47.0321	37.4361	35.0879	10.5499
									97	73.2228	90.4517	50.5752	34.1487	38.0231	38.1908
									98	90.4517	56.5497	23.6203	26.3663	63.5675	57.6804
									99	56.5497	46.8237	76.4185	47.2312	28.1777	25.3935
									100	46.8237	1.9452	24.4539	40.3042	34.4506	103.016
									101	1.9452	35.0136	9.65652	25.9302	40.7402	33.679
									102	35.0136	47.2405	15.2142	13.4347	34.2661	19.3051
									103	47.2405	68.5682	102.262	53.1518	34.2493	19.2883
									104	68.5682	51.1309	33.5547	45.6378	29.9388	54.1246
									105	51.1309	75.4459	51.4783	36.6981	40.2538	22.5254
									106	75.4459	69.8882	37.723	43.7928	11.9084	25.578
									107	69.8882	99.7609	4.09881	57.6636	35.3563	88.223
									108	99.7609	82.8793	4.44617	42.1156	54.9465	29.184
									109	82.8793	44.7396	25.0792	48.6568	53.5376	23.0621
									110	44.7396	99.8304	48.8384	36.1614	23.4311	33.3604
									111	99.8304	42.7249	2.84833	45.9732	41.4111	23.4814
									112	42.7249	48.9078	18.8267	20.6301	37.4864	76.8681
									113	48.9078	46.8237	57.036	21.1165	70.7964	15.8332
									114	46.8237	28.3443	21.5361	34.5177	46.8622	45.5539
									115	25.0097	21.4667	16.3952	43.5245	31.7838	24.1691
									116	47.3795	23.0645	1.80626	67.1736	44.0947	11.1201
									117	49.5331	23.6203	81.2815	40.6061	39.0127	15.2461
									118	41.3355	21.3277	1.38943	27.5907	36.0943	11.1872
									119	52.9372	50.7141	3.26515	51.2901	43.8096	19.9592
									120	47.1711	37.584	112.127	49.16	36.7987	14.4411
									121	38.4871	83.2267	8.75339	20.2276	12.9651	71.8866
									122	2.50097	38.5566	31.8179	29.5195	63.0811	17.6446
									123	61.6211	54.6045	65.6504	88.5752	27.3558	31.3141
									124	1.9452	35.5693	46.6153	16.3363	52.2126	18.1478
									125	102.262	38.0008	52.3119	45.8223	23.0286	45.1849
									126	30.9842	52.3814	21.8835	47.4157	25.7289	46.5435
									127	48.2826	26.6075	118.31	39.4152	43.3735	27.6242
									128	25.2876	88.9234	96.3568	51.4746	42.8871	13.3341
									129	38.4177	73.5007	39.946	31.1632	67.8445	14.2901
									130	72.5976	83.0878	12.2964	45.7552	11.1537	65.9492
									131	86.1445	30.2895	26.8159	37.1174	42.2162	16.9905
									132	27.7885	48.63	2.4315	11.4891	33.8635	42.7865
									133	58.6338	41.1965	73.3618	55.2987	49.0594	47.2312
									134	69.8882	63.4274	7.43344	46.2919	38.4089	17.6781
									135	40.8492	41.5439	48.7689	86.6632	12.3781	15.917
									136	32.2347	52.0341	70.7913	18.5503	38.3586	26.0308
									137	40.2239	56.1329	59.398	21.301	53.3531	51.9945
									138	59.7454	59.2591	102.401	20.6804	15.0449	20.3282
									139	5.07141	64.5389	67.943	42.6691	50.3844	80.4406
									140	43.3501	52.3814	72.2502	64.2049	82.3694	30.5929
									141	33.1378	90.938	96.2873	38.8282	63.903	60.1124
									142	28.3443	57.036	51.6867	77.4383	56.5902	16.6047
									143	18.8962	42.9333	28.8306	21.2339	20.4624	44.7489
									144	43.1417	33.2073	2.01467	10.4157	49.8644	52.6151
									145	55.1603	40.5018	53.0067	32.2198	35.2389	51.6759
									146	55.2992	38.4177	40.3629	59.8608	11.7575	77.8576
									147	26.6075	2.22308	90.5907	17.0576	49.2439	52.8164
									148	28.4833	48.1437	52.1035	47.097	43.5916	31.3644
									149	36.9588	43.2807	119.63	31.0793	10.4492	49.7974
									150	25.0792	28.3443	56.2023	52.6151	78.8472	63.0811
									151	54.8129	79.4752	12.7827	32.7062	35.2221	28.5299
									152	52.7288	39.3903	55.5076	22.8105	28.815	71.8196
									153	87.8118	67.8041	55.7855	30.5426	38.4927	43.558
									154	46.4763	57.8697	31.1232	64.1042	41.5453	59.7769
									155	4.3767	60.0233	61.6906	35.4066	12.8309	25.3935
									156	76.2796	60.579	63.6358	43.2393	53.5208	47.2647
									157	54.8129	50.0889	25.0097	10.7679	61.7729	18.7851
									158	1.66731	46.3374	45.4343	25.1586	55.349	52.0113
									159	59.0507	55.0908	85.1719	19.5399	32.6559	12.9148
									160	92.4664	54.1182	26.4686	40.7235	33.4275	15.0281
									161	63.1495	66.4146	54.3961	60.0789	54.762	51.5752
									162	15.4921	40.7797	40.7797	14.0721	37.6038	27.4229
									163	8.47551	53.493	74.7512	42.4007	44.4134	21.3513
									164	18.6878	53.7708	54.1877	16.1351	37.2348	20.0431
									165	46.4069	14.0332	12.5048	57.1269	46.4764	31.3812
									166	8.47551	97.4683	17.09	13.7869	26.9365	19.6237
									167	9.17022	32.4431	73.5702	35.7756	54.6949	45.3694
									168	2.84833	84.4077	16.7426	48.4723	62.3599	29.0834
									169	3.54304	14.0332	36.8893	56.0702	40.5725	30.1568
									170	22.7171	15.9784	72.4586	42.3504	21.1836	17.8459
									171	43.767	84.2688	51.4783	29.2679	47.1809	20.0766
									172	12.088	62.3158	76.7659	43.1722	26.8023	30.4755
									173	10.6291	62.1769	29.4559	48.9084	41.3273	63.2992
									174	44.3227	34.9441	56.2023	62.4438	70.9306	83.9796
									175	22.2308	45.1564	40.7102	22.2738	23.0118	71.2661
									176	56.6192	24.1066	91.7717	13.267	42.4343	14.1727
									177	72.1808	40.7102	28.6917	56.087	34.6183	12.2606
									178	35.8472	2.29256	45.2259	21.6868	46.5435	39.8178
									179	91.9106	33.2768	14.3806	44.0109	52.3803	25.6115
									180	33.902	65.0252	35.8472	46.8119	11.6401	25.5109
									181	40.0155	32.7905	69.8187	39.7003	41.0086	28.8654
									182	48.2131	91.1464	89.8265	17.9297	58.9719	36.7652
									183	1.66731	57.5223	28.7611	37.9392	46.0236	38.1405
									184	42.5859	52.5898	44.5311	12.9986	44.0947	91.0911
									185	10.5596	46.5458	78.85	35.4905	62.0245	30.7271
									186	34.6662	38.8345	78.9889	32.2031	48.9755	38.9791
									187	18.132	29.4559	80.3089	18.9528	37.6541	40.7235
									188	20.9804	32.0263	35.4304	30.4923	56.0535	36.6142
									189	44.5311	79.7531	18.8267	27.7584	46.7448	35.7588
									190	21.953	82.4625	23.6897	19.3722	22.0725	55.9361
									191	55.2992	48.9773	69.8882	20.8481	24.5548	48.8749
									192	38.4177	49.8804	32.3042	16.7221	12.4955	53.4034
									193	37.3061	78.9889	47.7268	25.1754	58.7538	50.1999
									194	71.625	42.1691	69.124	37.4025	33.3604	60.6156
									195	32.3737	45.9206	56.0634	81.3631	31.985	45.0843
									196	38.2093	65.581	85.3803	41.7298	14.3404	17.8291
									197	65.7199	33.0684	27.858	54.3091	11.3214	53.7724
									198	15.8395	37.723	50.853	20.8146	53.1015	37.9728
									199	41.8218	31.2621	48.5605	30.8277	56.8585	10.6505
									200	60.2317	77.0437	45.8511	56.5231	19.9927	12.1432
									201	33.7631	26.0518	132.204	25.1419	57.7978	46.0739
									202	49.3247	60.718	30.4285	47.8014	26.1315	53.5041
									203	58.3559	42.3081	33.6241	29.3518	84.0802	43.6922
									204	30.2895	66.4146	79.8226	44.7153	23.0789	90.9737
									205	37.584	25.0792	51.0615	27.8758	33.8468	48.7575
									206	44.809	34.041	38.904	27.7919	13.4515	16.068
									207	42.9333	54.3266	38.3482	40.8912	56.1206	30.4252
									208	65.442	109.626	31.4011	37.0503	41.1931	74.5702
									209	38.3482	33.4852	36.1251	46.7615	41.6627	28.2951
									210	47.9352	43.5585	76.4185	67.4755	28.8318	10.9692
									211	61.2737	26.1212	44.3227	30.0059	34.6015	15.3468
									212	38.0008	58.7728	92.8832	15.5984	40.8241	40.8241
									213	38.5566	2.77885	154.226	79.602	60.6491	49.4116
									214	48.3521	43.0722	39.3208	84.7679	48.6401	11.2375
									215	35.7083	51.6867	97.2599	55.1813	64.4397	20.0095
									216	3.47357	32.1652	69.8882	31.247	29.5363	24.0517
									217	17.9931	38.2093	58.0086	35.7253	51.7765	75.2915
									218	56.8971	27.7885	3.82093	41.646	70.7293	63.5004
									219	85.7971	2.15361	2.15361	52.6151	28.0938	89.4642
									220	175.971	54.9519	5.27982	39.1804	53.655	35.7253
									221	23.7592	88.8539	30.2895	43.6083	59.7769	51.7933
									222	21.2582	107.611	5.14088	46.3758	70.8635	22.1396
									223	39.5987	58.5644	20.7025	47.3486	52.6151	37.1006
									224	23.134	57.1749	4.58511	11.942	37.8386	44.7321
									225	39.7376	36.403	10.2818	79.9206	17.3427	19.8418
									226	39.5292	1.66731	2.01467	50.854		60.8839
									227	35.9167	39.8766	12.3659	36.1278	77.2538	98.4542
									228	56.2023	18.132	12.8522	43.1555	48.7071	50.7702
									229	27.858	35.6388	10.3512	32.2198	23.515	86.6464
									230	100.525	45.9206	15.7005	25.645	52.2797	56.3721
									231	99.483	32.4431	48.491	24.3871	18.3155	17.8123
									232	35.083	41.0576	100.525	49.4116	30.3246	37.6541
									233	22.5087	36.1251	1.52837	19.3218	81.5308	13.1664
									234	76.1406	79.6142	18.5489	40.4216	19.7076	35.7588
									235	67.8041	84.4077	6.59978	103.369	17.8459	11.3885
									236	31.1232	53.2845	53.7014	66.184	60.1795	52.9338
									237	1.66731	54.3266	38.8345	17.2085	43.3232	27.9093
									238	39.8766	39.4597	23.2034	20.3617	64.8925	67.2071
									239	18.132	35.9862	36.1251	20.4288	22.4247	19.1373
									240	35.6388	30.4979	80.7257	32.3876	75.5598	15.8499
									241	45.9206	38.9734	29.3169	21.15	46.51	32.2869
									242	32.4431	24.6623	42.0302	31.9515	17.6446	11.1034
									243	41.0576	35.083	30.1506	45.7217	21.6364	22.9615
									244	36.1251	47.8658	16.2563	29.3853	47.4995	78.8808
									245	79.6142	50.4362	46.6153	52.6151	32.5385	21.3849
									246	84.4077	34.4578	31.4011	11.2878	43.776	18.5671
									247	53.2845	75.6543	53.2845	68.5322	58.301	76.8177
									248	54.3266	22.9256	67.6651	24.0517	25.8295	16.8563
									249	39.4597	44.6701	46.0595	14.8604	27.0036	41.5453
									250	35.9862	47.3795	72.5976	50.267	19.607	11.1369
									251	30.4979	43.4196	66.762	11.422	37.8722	85.2207
									252	38.9734	32.0958	13.0606	103.184	40.6899	91.2588
									253	24.6623	93.9253	54.535	87.7366	71.8028	17.2756
									254	35.083	43.1417	1.73678	77.0526	38.4927	101.758
									255	47.8658	42.5165	24.7318	43.8935	16.1351	54.5775
									256	50.4362	48.9773	77.0437	73.6645	15.9338	24.8903
									257	34.4578	43.6975	22.2308	27.5068	68.3812	40.388
									258	75.6543	41.266	17.2984	19.7244	81.514	97.213
									259	22.9256	77.7385	3.33463	13.5354	55.7516	11.0866
									260	44.6701	48.9773	1.4589	76.6836	102.094	27.5236
									261	47.3795	30.9842	5.69665	57.1605	23.4982	98.3032
									262	43.4196	50.1583	3.19568	24.0517	85.1201	18.9361
									263	32.0958	38.6261	29.5948	75.3753	52.1455	25.4941
									264	93.9253	4.44617	6.80819	82.0843	44.3128	49.4284
									265	43.1417	2.9178	8.47551	65.6976	96.2738	67.7439
									266	42.5165	11.3238	22.1614	41.646	60.7665	56.5399
									267	48.9773	35.7083	81.1426	15.1287	16.5208	21.8545
									268	43.6975	45.6427	4.79352	12.4451	32.2031	45.6042
									269	41.266	30.1506	45.6427	54.3762	18.1478	90.0512
									270	77.7385	39.4597	22.7171	26.7856	72.742	102.832
									271	48.9773	6.53031	9.93441	24.5716	52.7493	23.0956
									272	30.9842	62.2463	92.0496	59.4918	32.4043	47.097
									273	50.1583	27.9275	45.4343	26.9365	86.2103	10.9692
									274	37.4451	33.6241	35.2915	20.9655	57.8146	47.1976
									275	2.70938	35.6388	7.29449	59.0893	34.9034	39.3146
									276	45.7122	23.8982	10.0733	43.2729	52.1119	85.4891
									277	40.4323	34.8052	26.7465	49.747	65.8989	48.5059
									278	32.5126	12.9217	10.6291	93.5566	17.913	35.2221
									279	2.36203	59.6759	2.08414	58.7035	33.9809	19.1541
									280	25.2181	47.2405	32.86	10.4828	15.112	38.0399
									281	35.0136	32.2347	110.946	80.7257	10.4492	36.9329
									282	41.1965	46.7542	166.245	85.4723	32.2366	17.0072
									283	38.2787	94.3421	48.5605	93.674	50.4515	50.7031
									284	33.1378	38.765	79.7531	27.8255	19.8586	93.6573
									285	34.2494	42.3081	50.2973	27.1043	17.5943	11.053
									286	26.3991	40.6408	36.2641	83.208	34.6183	60.2298
									287	8.40604	72.8755	31.9568	28.0603	73.6981	82.0507
									288	59.6064	44.809	27.858	31.9179	44.6147	89.33
									289	29.5948	31.0537	52.7982	53.0847	101.775	73.7819
									290	66.762	41.6133	63.4274	39.3146	43.3567	13.9043
									291	48.9773	8.19762	6.73872	57.932	23.7665	41.6963
									292	41.6133	34.3189	46.129	38.1573	10.4828	21.1836
									293	51.0615	38.0008	78.1553	25.3431	54.4936	11.9587
									294	57.6612	38.4871	64.6084	82.5036	42.6691	42.1156
									295	52.0341	30.2895	36.6809	52.0784	59.2067	10.9859
									296	37.3756	59.6759	96.2178	17.024	83.1913	56.3386
									297	40.7102	72.0418	78.9195	68.9012	29.2176	11.5898
									298	48.3521	74.8901	42.0302	55.6006	34.7357	21.9383
									299	36.8893	29.9422	10.7681	20.2611	96.2905	93.7244
									300	48.9773	57.1749	44.6006	43.1555	51.8939	70.0081
									301	1.66731	31.4011	52.3119	16.8395	48.1537	26.5843
									302	5.14088	49.7415	100.525	44.7321	92.2652	28.2112
									303	23.3424	37.8619	143.528	11.8749	25.947	29.1337
									304	45.6427	31.4011	51.9646	66.7878	59.2905	30.5594
									305	37.2367	36.9588	27.5801	56.0032	56.0702	20.0934
									306	38.5566	69.7493	20.8414	41.1092	75.174	11.6736
									307	40.5713	26.9549	59.6759	32.7062	46.0906	34.6854
									308	42.9333	20.2856	118.866	26.7017	40.0023	53.7221
									309	49.2552	51.3393	38.4871	12.3948	26.5843	58.2003
									310	28.0664	29.3864	40.2239	102.362	88.1895	40.6228
									311	59.6064	19.6604	70.6524	19.825	33.7294	16.8563
									312	61.76	26.8159	8.61445	58.3513	95.0661	70.6119
									313	58.0781	53.1456	83.7825	61.4877	17.7117	25.5109
									314	52.5898	31.1232	9.79546	41.5453	27.0707	34.5344
									315	29.178	40.9186	40.9186	70.1088	53.1518	24.6555
									316	56.4802	33.4852	35.9167	114.858	82.3694	62.7121
									317	38.0703	39.6682	12.5743	77.8409	19.1038	16.9066
									318	60.7874	19.1741	17.09	31.5993	29.2344	54.6781
									319	2.36203	53.7014	73.5702	13.1328	73.2452	103.05
									320	31.1232	32.4431	72.4586	58.7538	116.434	47.0299
									321	56.8971	39.946	29.4559	36.0607	28.0435	112.426
									322	37.4451	72.5281	40.7102	42.451	87.5689	117.323
									323	29.3864	34.041	91.7717	52.4977	47.8014	38.0231
									324	51.5478	24.5929	28.9001	41.7298	79.1156	60.0285
									325	27.3717	61.76	45.2259	55.2316	74.8554	59.7937
									326	49.5331	6.66925	14.3806	39.4655	73.5639	34.8867
									327	29.6643	53.8403	35.8472	32.354	20.8146	11.1537
									328	2.98727	39.6682	28.8306	14.1895	21.0159	53.7724
									329	42.5165	9.10075	44.5311	56.3386	42.5852	16.7557
									330	14.0332	41.4744	79.0584	20.8817	57.4624	32.9578
									331	30.0116	36.6809	78.9889	23.6827	25.8463	33.2933
									332	15.9089	73.5007	80.3089	89.4642	41.7634	39.7339
									333	51.2699	47.2405	35.4304	31.5322	29.2344	15.6822
									334	34.6662	62.4548	23.6897	19.7579	25.4941	73.9832
									335	45.1564	45.8511	69.8882	32.6559	24.5716	18.3323
									336	58.3559	49.8804	32.3042	58.1165	18.0807	47.1305
									337	67.4567	9.10075	47.7268	16.2357	13.0657	18.869
									338	32.0263	32.0958	69.124	74.5367	91.1414	28.3286
									339	36.5419	37.1672	56.0634	25.645	37.2516	60.9342
									340	31.8874	71.7639	27.858	50.9547	34.7022	35.7253
									341	38.2093	69.8882	50.853	28.9492	50.2167	60.8504
									342	50.9225	41.266	48.5605	64.4565	19.1038	13.0657
									343	2.70938	33.902	45.8511	24.8735	73.6981	35.306
									344	38.3482	38.765	30.4285	59.5254	79.1323	16.2357
									345	35.2915	35.1525	33.6241	69.5888	82.0675	38.3082
									346	71.5555	9.79546	51.0615	16.4705	79.4342	22.4415
									347	42.0302	44.1838	38.904	26.6346	42.451	63.2656
									348	62.8021	63.2189	38.3482	28.3622	55.131	19.2715
									349	22.3698	35.2915	31.4011	21.5693	27.0707	12.3948
									350	1.38943	49.3941	1.4589	44.6314	49.2606	29.5866
									351	39.4597	33.4852	77.9469	31.18	40.5725	31.8676
									352	60.0927	62.3158	25.9823	80.3064	49.8644	52.7996
									353	68.4988	18.271	2.70938	52.699	16.2022	24.5884
									354	34.2494	61.0653	44.948	36.4297	55.4161	34.3499
									355	96.1484	38.6956	45.2259	34.1319	73.8155	26.9868
									356	31.3316	35.4304	36.1251	31.9347	51.7933	84.6672
									357	52.3119	59.8843	1.59784	30.5929	71.4841	23.4814
									358	48.3521	27.7885	41.266	12.3781	36.8658	38.1405
									359	32.1652	79.5447	1.52837	47.0467	47.6169	18.5
									360	32.1652	35.4304	16.3258	68.8005	37.7883	30.2575
									361	24.6623	54.6045	170.9	16.7557	25.9637	60.3304
									362	1.38943	69.7493	48.7689	13.0657	28.4628	27.4565
									363	38.2093	48.0047	17.6457	50.7366	20.8649	10.6337
									364	35.8472	42.3775	9.79546	79.7865	20.345	101.943
									365	50.7141	36.2641	24.8013	20.563	68.1967	50.7366
									366	39.5987	66.0673	48.0742	22.9615	37.1342	31.3309
									367	26.0518	31.6789	64.261	19.4728	39.9016	42.5013
									368	30.2895	27.5107	56.7581	52.4977	59.2235	51.4411
									369	26.6075	58.8422	39.5292	27.2887	66.4356	21.8042
									370	39.1819	40.7102	82.393	65.4628	24.0181	15.1287
									371	34.8746	42.7249	33.0684	30.7606	35.2892	70.6287
									372	56.6886	23.6203	30.4979	108.786	33.0249	17.2253
									373	94.7589	31.8179	49.9499	15.1958	19.7915	29.3014
									374	44.1143	55.1603	44.2533	40.6228	80.7928	66.1672
									375	58.9812	56.7581	32.4431	53.6718	52.9673	29.335
									376	16.3258	1.87573	60.5096	17.3092	38.9959	43.8264
									377	16.6731	21.953	41.8218	41.0254	30.811	40.4719
									378	35.4304	24.9402	54.8129	59.995	33.679	33.092
									379	31.6095	16.6731	50.1583	40.3042	32.0186	34.5177
									380	100.317	3.61251	24.0371	16.8898	59.6763	11.6401
									381	48.63	75.168	3.8904	30.1233	62.796	51.4411
									382	72.5976	36.8893	35.4304	16.6886	34.6183	34.3499
									383	29.5253	47.0321	47.2405	72.1718	27.8087	39.4655
									384	39.8071	33.2768	61.5516	65.5634	39.0295	36.9832
									385	45.2259	2.22308	30.9148	32.1192	54.9465	56.4225
									386	21.1193	4.51564	54.1182	35.8427	47.684	27.0204
									387	24.6623	52.7288	31.3316	24.7226	76.281	50.5018
									388	50.7141	12.3659	76.8353	71.5512	31.9012	53.2525
									389	59.6759	28.1359	27.5801	12.1097	27.9764	38.4592
									390	28.3443	48.3521	40.0155	73.111	34.9537	44.1786
									391	44.5311	27.5801	60.2317	39.4488	26.752	16.5879
									392	41.5439	46.2679	60.579	41.1931	28.1106	16.3531
									393	25.8433	44.2533	56.2023	59.5925	50.6695	38.7443
									394	25.0792	39.1124	45.0174	18.0639	55.7516	20.2946
									395	32.9294	46.6153	42.0996	41.9311	48.5226	44.6147
									396	1.52837	56.4108	2.9178	38.4927	25.8128	78.5788
									397	52.7288	40.1545		28.7983	55.4161	52.4139
									398	12.3659	48.5605		106.203	52.0113	23.0286
									399	28.1359	37.8619		29.7375	25.947	17.8626
									400	48.3521	20.9804		44.7153	17.6781	33.8971
									401	27.5801	9.37863		18.3994	41.5789	11.2208
									402	46.2679	41.8912		14.6088	50.3173	39.1972
									403	44.2533	42.7944		55.0471	28.3957	44.9166
									404	39.1124	48.6994		60.7833	19.5734	17.0072
									405	46.6153	42.0302		29.8717	29.9052	71.8699
									406	56.4108	50.9225		52.2126	54.2085	11.9923
									407	40.1545	36.6114		10.7008	18.0975	38.325
									408	48.5605	45.99		59.3912	45.0843	19.3386
									409	37.8619	48.2131		19.7412	31.9515	35.306
									410	20.9804	50.853		44.6818	10.7344	65.3454
									411	9.37863	43.9754		57.4791	44.6985	66.7543
									412	41.8912	46.1985		14.1392	52.2797	41.5118
									413	42.7944	42.7249		31.6328	38.912	38.5431
									414	48.6994	46.8932		21.5526	40.8912	83.946
									415	42.0302	42.5165		67.9787	37.4193	24.7729
									416	50.9225	14.6585		28.7815	32.2031	25.8631
									417	36.6114	36.2641		22.5421	65.1441	14.5082
									418	45.99	47.7268		48.053	44.9333	42.6523
									419	48.2131	40.0155		18.8187	35.9601	14.2566
									420	50.853	24.315		30.3078	28.01	15.2126
									421	43.9754	39.7376		29.1337	33.2597	19.456
									422	46.1985	36.1251		44.5979	27.6913	11.791
									423	42.7249	35.4304		43.6586	18.1813	15.8667
									424	46.8932	22.0919		29.2679	29.2344	96.6931
									425	42.5165	45.8511		32.5721	39.7003	32.0186
									426	14.6585	32.9989		28.9995	20.563	25.947
									427	36.2641	7.98921		51.4411	39.6333	61.0852
									428	47.7268	52.173		12.0258	35.1718	38.1573
									429	40.0155	25.7044		40.0526	39.9687	25.0245
									430	24.315	38.0008		20.2108	36.3626	39.9352
									431	39.7376	44.6701		37.0168	36.0607	27.6913
									432	36.1251	47.9352		80.4574	45.7049	51.8771
									433	35.4304	50.9225		15.1455	49.1265	76.9351
									434	22.0919	38.5566		34.0313	27.7919	41.7801
									435	45.8511	44.4617		10.5834	45.772	54.175
									436	32.9989	60.0233		11.791	32.2198	42.2498
									437	7.98921	74.5428		45.3023	13.1328	18.349
									438	52.173	31.6095		108.635	39.2978	46.51
									439	25.7044	55.7855		10.4157	43.0884	39.6836
									440	38.0008	43.4196		56.5063	56.8082	57.9152
									441	44.6701	38.904		17.0072	50.0322	117.038
									442	47.9352	56.6886		33.5113	43.0548	44.3799
									443	50.9225	51.3393		20.7475	44.5644	36.631
									444	38.5566			43.1052	29.7711	50.7869
									445	44.4617			24.6219	28.01	71.8531
									446	60.0233			42.3168	28.5467	64.4565
									447	74.5428			33.5449	58.7371	85.5394
									448	31.6095			113.516	53.8563	42.3839
									449	55.7855			77.3041	44.6314	49.9148
									450	43.4196			13.4515	49.1432	32.1695
									451	38.904			19.238	34.937	31.3141
									452	56.6886			28.4293	15.112	42.5349
									453	51.3393			102.714	53.5544	59.1731
									454				99.645	24.6555	44.7992
									455				20.5798	11.8078	52.6822
									456				18.1142	50.8876	26.8862
									457				75.1237	47.5834	38.0566
									458				57.5798	20.6301	47.1641
									459				48.1033	39.3649	37.1006
									460				21.6868	61.0852	56.2715
									461				30.811	50.9547	44.296
									462				27.6745	27.9261	46.3255
									463				15.4642	51.223	15.7325
									464				15.9338	47.5666	62.5612
									465				17.6446	31.5657	78.713
									466				57.4624	21.5693	57.3282
									467				57.7307	34.5344	43.709
									468				96.7434	35.7588	79.4678
									469				67.7439	45.8391	66.5195
									470				108.92	26.4669	33.1759
									471				32.7733	61.4206	35.4905
									472				40.5222	61.1355	87.3005
									473				66.8214	30.5258	84.7846
									474				69.3037	45.7887	49.5122
									475				20.0598	15.7996	28.228
									476				62.5276	25.3096	26.0308
									477				34.7357	58.3848	16.2357
									478				79.9542	58.5526	75.3585
									479				47.8853	15.6151	37.8386
									480				24.32	23.2634	77.9079
									481				50.5857	71.9537	53.655
									482				13.5521	32.3373	67.2239
									483				43.5077	59.7602	22.2738
									484				12.7638	76.9855	42.1659
									485				50.1831	36.044	16.068
									486				51.9945	28.4628	28.8318
									487				13.5186	86.5961	82.8223
									488				18.0471	13.6528	56.4392
									489				60.6491	86.6967	27.8255
									490				67.5258	49.8477	19.0703
									491				85.7239	49.4116	51.3572
									492				49.7303	67.66	51.1391
									493				30.9787	76.8681	24.0014
									494				54.6949	61.2026	29.5027
									495				13.4179	93.5734	45.2185
									496				40.8744	35.4066	20.6636
									497				98.4206	67.9787	26.0811
									498				25.4438	102.815	41.6627
									499				76.3146	32.5217	34.5512
									500				39.4823	98.8567	27.3391
									501				25.427	43.4406	65.0603
									502				36.2452	12.7806	45.5875
									503				48.3046	45.3527	71.0145
									504				41.3776	51.0553	58.4519
									505				39.5829	95.737	30.9284
									506				23.8504	73.8155	38.4424
									507				37.2851	24.2529	42.7529
									508				11.2208	39.9184	35.8595
									509				52.7661	33.1256	56.8585
									510				27.3223	32.9243	36.7652
									511				72.1718	32.9914	19.238
									512				24.6722	59.8776	70.1591
									513				31.6496	42.5349	25.4606
									514				41.4782	26.3327	16.806
									515				110.564	23.364	19.8921
									516				15.8164	47.8685	30.811
									517				70.2597	47.9188	53.2022
									518				61.3368	43.1052	27.2049
									519				49.8477	56.6908	74.2851
									520				49.8644	20.0095	21.2507
									521				14.1727	34.8867	84.5163
									522				60.3975	27.7081	27.6577
									523				91.9968	33.8803	23.0956
									524				50.5186	40.2035	10.3989
									525				79.7194	52.3468	10.8685
									526				20.1269	17.98	19.3386
									527				18.1478	44.2792	27.0036
									528				38.6437	71.6015	10.8685
									529				58.67	10.4157	32.8404
									530				105.817	17.0408	48.9084
									531				60.4143	68.1296	47.3653
									532				77.2371	46.1577	32.9746
									533				67.7271	59.4247	59.1899
									534				20.1437	60.9007	18.8187
									535				15.8835	32.6056	34.3332
									536				19.087	42.5013	19.9089
									537				37.2683	31.8844	17.1414
									538				50.0993	89.9002	22.1732
									539				42.7697	17.393	54.1079
									540				59.8273	75.6604	28.228
									541				55.8019	16.7557	86.6296
									542				61.4039	78.5285	65.7312
									543				47.835	33.9306	24.2026
									544				35.2221	59.0054	43.558
									545				28.8821	59.6092	42.82
									546				38.1237	85.0698	38.476
									547				45.4701	61.3871	16.7389
									548				68.7334	30.1065	23.8001
									549				51.0721	56.2883	45.3191
									550				33.0081	35.0041	47.097
									551				43.5916	74.4361	40.4048
									552				25.8799	24.9071	28.7479
									553				33.8635	30.6768	11.3549
									554				40.7402	17.1414	16.2693
									555				53.1854	54.0408	30.9955
									556				25.4606	53.3363	75.7611
									557				41.5285	20.932	67.9954
									558				24.9742	29.7711	23.9175
									559				29.5698	33.3268	23.8672
									560				38.6605	56.2547	24.7393
									561				91.2085	36.9329	18.2149
									562				59.5421	18.6509	14.592
									563				19.5734	23.6491	35.0208
									564				33.7965	26.9365	27.8087
									565				15.7493	17.913	27.8087
									566				32.6392	23.0286	67.2071
									567				67.1233	27.0539	29.9052
									568				32.354	83.6106	43.7928
									569				12.4116	24.7729	19.3218
									570				42.4175	49.5625	18.0471
									571				32.1863	38.5934	13.9043
									572				63.8862	64.7416	23.4646
									573				60.7833	64.708	10.3821
									574				32.0689	54.5607	10.8014
									575				14.005	75.543	28.1106
									576				83.2919	38.0399	22.7937
									577				68.4986	14.6423	43.8767
									578				25.6115	28.6976	15.7829
									579				99.4773	40.2035	11.573
									580				26.6179	18.8019	33.3771
									581				12.5793	66.6536	28.8318
									582				18.1813	35.155	52.3803
									583				16.7557	40.2706	15.0952
									584				24.2865	51.5752	37.1509
									585				23.0453	47.835	41.9479
									586				57.7307	30.3749	17.5775
									587				38.4592	35.7924	29.1505
									588				40.4383	11.5562	63.903
									589				32.6727	16.7389	12.3277
									590				10.9356	29.1002	32.2198
									591				59.5589	19.7915	13.0657
									592				28.5467	44.0109	21.3178
									593				13.7366	50.4347	13.2167
									594				31.5154	24.9406	13.485
									595				17.9633	92.7516	30.7942
									596				35.5576	28.8486	11.2543
									597				14.5585	15.4139	31.1967
									598				38.9959	13.1831	44.1954
									599				33.8468	14.0218	40.8409
									600				41.9479	86.3613	35.9601
									601				27.859	62.2425	13.1664
									602				58.1836	35.8595	42.2833
									603				39.0798	24.4542	37.1509
									604				32.4547	19.7747	41.8808
									605				15.3803	13.4179	20.7307
									606				26.1818	38.2747	31.7167
									607				51.3404	39.9519	35.5743
									608				20.1772	30.4923	31.2806
									609				60.0621	43.3232	62.9637
									610				14.3404	15.5313	14.2566
									611				86.6967	60.3137	23.515
									612				25.3096	27.1043	12.1768
									613				31.2135	43.4238	48.1872
									614				39.281	40.9415	40.7906
									615				35.8427	26.3495	41.6627
									616				60.2634	25.6786	30.5929
									617				16.3699	21.9551	18.1645
									618				36.2452	44.4637	10.5499
									619				53.4034	39.801	26.7017
									620				54.5943	22.6931	39.2307
									621				49.3948	21.0494	74.5367
									622				16.5712	25.2928	50.5521
									623				62.1251	45.8894	37.4361
									624				71.3164	20.2276	26.8359
									625				16.7892	45.7552	56.1038
									626				35.675	11.1034	53.1183
									627				57.8481	54.1414	23.582
									628				78.1428	17.3595	16.2525
									629				52.4642	46.4261	23.9678
									630				71.199	60.7162	19.3889
									631				33.9809	35.7588	13.3676
									632				12.9986	68.7167	32.1863
									633				11.6736	68.2806	33.3771
									634				29.335	23.8504	13.7702
									635				18.3994	43.1387	19.087
									636				18.9361	47.2815	90.2525
									637				24.6722	29.9891	10.4492
									638				31.3141	57.4288	22.3073
									639				40.2035	37.3522	10.4492
									640				55.3826	35.2053	20.1605
									641				16.6215	21.1668	64.641
									642				37.3187	32.6895	27.4397
									643				26.2321	17.1247	26.8359
									644				73.8155	45.99	21.4855
									645				28.0603	39.7674	32.0353
									646				62.9134	46.8454	35.6414
									647				43.0716	50.8876	45.8055
									648				22.9615	52.8667	16.0848
									649				15.9841	14.2398	60.9678
									650				14.7933	38.4592	48.3046
									651				24.8567	14.0385	39.1301
									652				23.3808	17.1247	49.0761
									653				14.4746	12.3781	11.7407
									654				52.6654	16.9402	24.5045
									655				10.6169	28.1609	67.66
									656				53.5041	45.403	18.0136
									657				47.6169	35.9936	52.3971
									658				56.0702	30.1065	47.6002
									659				31.5993	45.5707	35.1718
									660				41.7801	26.7017	31.8844
									661				38.7946	29.6369	37.6206
									662				49.311	12.7303	13.3509
									663				19.7412	23.6324	24.2026
									664				28.1609	58.15	41.277
									665				16.5712	16.9234	29.1505
									666				28.2615	38.8617	19.2548
									667				37.9896	25.3431	25.4438
									668				33.6623	17.6781	33.6623
									669				43.0548	12.9819	21.3849
									670				33.1088	30.3749	14.4411
									671				21.7035	17.0743	13.0154
									672				30.3749	39.7339	11.7575
									673				93.9424	14.7094	46.3255
									674				24.4207	21.5023	35.4234
									675				35.9936	31.9683	17.9297
									676				46.8957	22.8608	34.7693
									677				27.7584	10.6505	37.5535
									678				25.5947	55.3826	14.3237
									679				16.5041	30.7942	53.1351
									680				21.3178	71.3332	26.2321
									681				15.112	13.5857	35.5576
									682				49.1935	14.7094	32.8404
									683				36.5807	14.3237	47.2144
									684				42.0317	68.5322	14.8604
									685				14.7933	11.0027
									686				11.1034	42.0317	20.6469
									687				31.0122	60.6994	24.7729
									688				54.6278	12.4451	26.6514
									689				11.2208	64.0204	45.7384
									690				34.0145	44.665	18.6509
									691				23.4982	49.3277	19.6741
									692				15.6151	35.8762	48.6568
									693				31.6328	51.5417	12.9483
									694				50.7702	16.8395	24.2026
									695				35.2221	29.5866	36.8826
									696				30.0394	62.5276	59.9111
									697				49.0929	35.0544	14.7094
									698				40.4719	50.0489	25.2257
									699				79.2497	15.2965	56.7244
									700				28.4964	40.4216	13.9714
									701				14.7094	62.5947	86.2774
									702				19.1206	26.8191	25.2425
									703				13.267	26.2321	24.9909
									704				39.3314	63.3663	30.7271
									705				104.694	32.2366	14.7094
									706				24.0684	34.6854	57.0598
									707				27.9596	23.213	10.6673
									708				27.7751	58.301	20.9655
									709				65.966	19.4728	11.5562
									710				23.1795	38.0902	16.1351
									711				43.4238	24.1691	12.8645
									712				13.1831	13.8037	24.1691
									713				22.8944	29.3853	13.5018
									714				15.5145	36.8658	21.519
									715				21.6532	46.51	19.7244
									716				26.3663	20.8817	17.4601
									717				66.6536	11.2878	63.534
									718				11.5562	34.6686	52.3971
									719				73.3626	23.1292	66.0163
									720				22.3577	19.5063	20.8817
									721				49.747	15.33	14.7933
									722				78.2769	16.5544	65.7983
									723				85.4555	12.6632	11.2878
									724				27.1546	13.8708	13.116
									725				28.3622	23.5653	13.2502
									726				77.8744	14.9107	56.4057
									727				74.7883	44.8495	49.3613
									728				73.5639	40.539	29.335
									729				15.2294	70.9474	36.6478
									730				22.7434	43.9773	11.3549
									731				42.7529	30.1568	36.0775
									732				41.5285	19.238	31.1296
									733				47.2312	26.534	27.9429
									734				48.3382	45.5204	14.9275
									735				53.2692	19.2883	11.0363
									736				89.0616	61.2194	17.4769
									737				46.0571	22.5254	14.9946
									738				28.9157	22.0725	15.9506
									739				79.7697	42.6355	14.8436
									740				60.951	42.1491	22.5589
									741				40.4383	40.6731	38.0399
									742				48.3046	44.3128	46.6945
									743				47.3989	17.5104	28.3454
									744				25.6786	36.9329	25.8966
									745				37.587	35.4569	11.573
									746				60.9007	85.9084	21.2004
									747				24.7897	44.3463	12.1768
									748				38.6772	39.7842	20.9655
									749				53.1686	36.4968	10.8853
									750				20.5295	18.4664	17.8291
									751				13.5018	32.3708	16.2189
									752				23.1124	31.9347	18.8522
									753				29.9891	11.2711	42.451
									754				49.3613	61.32	45.2688
									755				34.7189	37.7883	59.7769
									756				41.2099	77.975	20.0263
									757				38.2411	17.9465	46.1074
									758				96.9279	30.7606	38.5934
									759				18.5	14.4914	44.3966
									760				34.0313	23.8169	49.7974
									761				45.9732	19.1541	33.83
									762				15.1455	40.6396	25.2761
									763				27.6913	43.776	32.7733
									764				13.4347	31.3477	38.4927
									765				18.4329	34.2493	13.9379
									766				55.8857	19.3554	10.3318
									767				33.7461	44.5308	44.7321
									768				32.8237	26.4837	20.8649
									769				50.1999	38.9288	33.679
									770				20.6133	47.1809	19.5399
									771				18.7013	30.3749	32.7566
									772				22.039	18.6342	51.1391
									773				23.2466	14.6423	26.6011
									774				14.1056	94.0263	31.0625
									775				14.8101	23.2969	29.9891
									776				16.1854	67.7942	16.9569
									777				22.6428	44.3463	16.7557
									778				42.3839	30.3749	16.8395
									779				15.1287	54.175	16.7053
									780				34.5848	32.3876	81.7153
									781				17.9968	62.2257	28.6976
									782				63.8694	30.811	38.1405
									783				30.8948	43.0045	33.1759
									784				21.4855	61.907	20.3785
									785				95.4519	21.0997	27.8087
									786				17.024	47.097	21.3513
									787				27.9429	14.3404	37.2683
									788				12.16	25.8631	15.2294
									789				69.6391	15.7996	39.063
									790				21.4016	33.6958	17.4098
									791				74.7212	54.6278	26.5675
									792				39.0462	36.0272	14.3572
									793				14.1224	18.1478	25.0077
									794				27.2887	39.2978	43.8599
									795				26.4501	20.5295	33.0417
									796				38.1405	38.5431	15.4642
									797				17.6781	24.7897	33.5281
									798				20.1605	19.2715	33.5113
									799				39.7003	94.9487	29.9388
									800				20.0263	36.044	56.6908
									801				19.5231	69.0018	29.3518
									802				41.1595	31.8005	38.6269
									803				19.5567	68.0122	13.8708
									804				10.9021	12.747	29.3014
									805				37.9225	20.2276	16.068
									806				31.1967	48.6568	26.6346
									807				23.3975	31.4819	30.7606
									808				86.009	30.9116	12.9651
									809				79.0317	24.8064	38.6269
									810				45.4533	33.3604	35.4737
									811				22.2738	37.1509	45.3527
									812				37.0838	44.0947	62.3096
									813				34.6351	60.5653	16.2693
									814				30.2239	13.6528	30.1233
									815				18.9864	33.0752	12.7974
									816				43.7425	20.6972	20.2108
									817				48.2711	14.9442	39.65
									818				14.5417	15.5145	18.2149
									819				42.8032	41.7298	30.7942
									820				12.0594	41.8808	31.985
									821				30.4252	21.4687	19.9089
									822				107.159	17.762	40.4551
									823				33.2094	12.1768	24.2362
									824				38.7443	45.6881	31.2135
									825				27.2552	67.878	18.1478
									826				47.2983	51.8604	19.976
									827				16.9234	73.4297	15.1791
									828				64.6074	35.6079
									829				20.1605	29.4524
									830				43.9102	43.4909
									831				51.8939	17.6278
									832				18.6845	71.5512
									833				29.6704	49.311
									834				22.6596	30.2407
									835				47.9188	28.5299
									836				36.9832	27.9429
									837				28.0938	47.1809
									838				57.4959	29.1002
									839				18.7851	15.112
									840				50.9379	26.7856
									841				32.6895	32.136
									842				55.7851	43.6754
									843				78.6459	20.3114
									844				35.5743	24.8567
									845				50.0154	16.2693
									846				35.6414	36.7652
									847				23.1795	11.4723
									848				30.0394	51.1559
									849				13.2167	18.0975
									850				19.7579	16.068
									851					29.9556
									852					13.4515
									853					33.3268
									854					41.2099
									855					34.4506
									856					32.2702
									857					18.5
									858					21.9383
									859					13.049
									860					19.6908
									861					56.5231
									862					36.5136
									863					36.8323
									864					35.5743
									865					22.8944
									866					38.2076
									867					29.8549
									868					21.4519
									869					27.7081
									870					31.767
									871					63.1985
									872					39.7507
									873					29.2511
									874					60.7665
									875					20.8649
									876					21.301
									877					74.2851
									878					29.5195
									879					23.9846
									880					41.6292
									881					36.5974
									882					15.3635
									883					62.427
									884					41.5453
									885					43.6083
									886					19.456
									887					34.2325
									888					48.6233
									889					12.5793
									890					27.121
									891					48.6233
									892					16.1183
									893					14.5417
									894					50.1999
									895					31.5322

## Sheet: Fig 7G
Figure 7G Placode cell shape analysis when RHOU is depleted in the tissue
	Number of cells/placode				Placode area					Placode cell area
	shScramble	shRhou-505			shScramble	shRhou-505				shScramble Placode Cell Apex	shScramble Placode Cell Middle	shScramble Placode Cell Bottom	shRhou-505 Placode Cell Apex	shRhou-505 Placode Cell Middle	shRhou-505 Placode Cell Bottom
Replicate	Number of cells/placode	Number of cells/placode		Replicate	Placode area (um2)	Placode area (um2)			Replicate	Placode cell area (um2)	Placode cell area (um2)	Placode cell area (um2)	Placode cell area (um2)	Placode cell area (um2)	Placode cell area (um2)
Placode 1	56	49		Placode 1	2283.56	2386.8			1	22.8702	30.2331	34.5745	16.445	43.2051	87.5215
Placode 2	49	54		Placode 2	1735.35	2446.51			2	59.8064	46.4698	72.622	15.6288	53.9542	47.4249
Placode 3	30	57		Placode 3	1587.86	2962.01			3	71.1807	67.013	16.5839	45.1153	39.2458	19.6402
Placode 4	33	58		Placode 4	1489.77	2139.06			4	18.9109	49.5434	36.3284	42.4236	45.5668	37.8913
Placode 5	65	45		Placode 5	1682.31	2632.18			5	29.0176	51.3668	32.8553	28.3229	29.1738	39.9056
Placode 6	51	54		Placode 6	2276.96	2289.54			6	32.0739	59.3896	18.2337	40.3919	21.8977	30.7888
Placode 7	32	54		Placode 7	2370.47	2543.67			7	49.3177	35.8421	24.5894	64.5471	36.311	32.8379
Placode 8	40	61		Placode 8	1221.01	2569.27			8	15.9935	44.1428	37.3182	35.9984	19.8313	21.7241
Placode 9	28	42		Placode 9	1377.48	3490.83			9	43.344	36.3457	45.2021	18.7546	35.5122	39.8362
Placode 10	30	24		Placode 10	1675.73	2645.98			10	27.5936	20.387	32.7164	14.2743	51.5926	30.3547
Placode 11	28	28		Placode 11	1542.97	2169.18			11	39.211	21.6894	87.6778	26.6732	29.9553	41.2775
Placode 12	25	41		Placode 12	1192	2643.52			12	34.6266	13.1803	16.7923	25.3535	35.6859	18.963
Placode 13		44		Placode 13	1672.67	2937.23			13	27.0032	17.2959	48.7099	40.1835	26.1002	23.287
Placode 14		31		Placode 14	1541.69	3687.57			14	21.0816	50.3596	33.4631	42.4757	26.0133	19.4492
Placode 15		43		Placode 15	1932.07	3000.55			15	47.8764	27.5762	44.247	101.931	35.738	61.9076
				Placode 16	1773.09	3068.79			16	23.999	17.9558	21.8109	25.9786	34.9392	45.0111
				Placode 17	1134.09	2909.5			17	51.9572	66.8046	63.4357	39.7494	19.6923	48.1542
				Placode 18	1130.75	3784.38			18	23.6864	25.1451	28.184	14.4133	40.9302	33.8625
				Placode 19	1734.22	2278.88			19	24.763	16.7229	51.5405	36.5368	45.8793	24.5894
				Placode 20	1916	1687.44			20	26.3259	46.3308	67.5861	33.3936	17.9384	18.3031
				Placode 21	1916	1877.91			21	42.1805	66.8567	24.7283	33.8799	30.893	26.4822
				Placode 22	1578.51	1856.52			22	55.7776	65.6064	26.9163	22.3492	38.2559	40.5308
				Placode 23	1327.9	2031.61			23	37.6481	38.0823	20.1438	76.0083	37.9607	28.1146
				Placode 24	1327.9	2343.04			24	86.6185	55.9339	38.1517	37.6308	33.5847	36.12
				Placode 25	1036.69	2536.84			25	69.2531	24.5547	31.0493	34.3314	32.3517	36.7278
				Placode 26	1183.55	1502.32			26	48.1195	25.7355	35.4254	51.9572	37.2487	41.7811
				Placode 27	1206.27	1734.89			27	22.9223	30.3894	34.1924	11.6695	91.0641	25.7355
				Placode 28	1629.3	1819.1			28	21.6025	34.2793	77.4149	47.1644	39.211	21.9325
				Placode 29	1758.95	1943.9			29	10.7492	43.5697	26.4127	53.0512	44.3338	24.9541
				Placode 30	2040.97	1851.34			30	24.8672	32.5254	33.1158	30.6325	21.2552	33.7757
				Placode 31	1919.34	3044.75			31	63.6962	39.3847	51.5057	42.6146	48.4494	40.8086
				Placode 32		2253.49			32	50.6896	44.3338	54.7357	28.4098	30.3026	33.411
				Placode 33		2144.39			33	13.9444	34.2793	38.0649	29.799	47.3901	38.3601
				Placode 34		2388.48			34	39.4541	29.7643	12.121	13.5276	46.2266	29.3128
				Placode 35		2247.47			35	49.8386	36.5194	29.7122	13.7534	11.2701	50.3422
				Placode 36		2510.11			36	31.2577	19.3798	39.3326	34.0535	29.1391	34.8697
				Placode 37		1762.29			37	32.5254	20.9253	40.6524	13.6666	41.0691	41.538
				Placode 38		2484.05			38	23.6343	50.759	37.8218	37.7697	30.6673	75.2095
				Placode 39		2714.94			39	43.7087	35.3038	22.575	60.5531	43.4656	33.5499
				Placode 40		2204.03			40	39.1589	88.4072	107.856	41.4164	30.1463	29.8858
				Placode 41		2339.03			41	37.405	77.6233	24.9193	44.6638	32.4733	47.7027
				Placode 42		1964.78			42	72.0142	35.7553	31.2403	41.9374	48.2758	48.2758
				Placode 43		1206.6			43	16.4103	40.5482	48.8315	40.6871	38.0649	59.4243
				Placode 44		1938.05			44	31.8828	13.0067	63.1405	62.0639	40.5308	15.1252
				Placode 45		1762.29			45	16.7402	20.5085	96.0653	38.6901	42.0069	35.4601
				Placode 46		2003.55			46	36.9535	28.4619	101.657	50.2728	76.7897	33.2373
				Placode 47		1794.7			47	55.6387	49.2656	10.9576	27.611	32.8206	40.114
				Placode 48		1887.76			48	84.7257	41.6943	34.0188	32.1086	45.4452	23.999
									49	37.9781	81.7562	50.568	17.6085	51.9572	63.4184
									50	34.2793	59.4243	82.3987	42.7709	23.9816	33.7062
									51	63.2621	55.083	30.4068	14.6911	21.29	38.1517
									52	36.0679	22.575	29.6774	25.0582	20.1612	42.5105
									53	58.695	43.1182	36.8841	19.7271	14.7606	20.0744
									54	33.2894	48.7099	97.4719	36.9188	32.1607	35.5643
									55	35.5296	17.3133	35.5122	15.16	23.3564	19.0672
									56	31.7266	12.5725	28.7397	21.3594	15.7504	32.5601
									57	50.95	28.705	25.0582	25.5097	16.966	24.9367
									58	20.7343	14.7606	17.4348	39.5062	17.7301	23.5301
									59	41.2949	23.5648	44.6464	28.6529	30.6152	36.6583
									60	29.8685	24.2073	37.2487	30.32	23.5648	25.3535
									61	20.2307	37.735	49.9602	57.2189	41.1039	21.863
									62	22.2624	41.4512	58.2435	44.0907	48.3973	45.7231
									63	27.0205	45.3063	36.0853	39.02	27.611	50.6548
									64	29.7295	32.5254	43.0314	59.3201	31.4487	29.7122
									65	46.5392	65.6759	50.0644	26.708	22.4361	23.5301
									66	50.4985	37.7871	15.2642	40.3051	12.4162	27.472
									67	40.0272	27.3678	26.7948	31.7266	44.6985	20.6474
									68	46.0009	27.7672	28.8439	15.0037	26.8122	14.1528
									69	38.4296	51.7662	46.435	42.4236	57.271	21.1858
									70	28.9481	28.6182	65.1202	50.568	40.9823	32.508
									71	33.0637	37.544	23.3912	44.1949	26.9684	29.8511
									72	36.6236	52.8255	37.5092	18.9977	37.4224	34.2445
									73	19.7444	48.3279	13.3887	33.3242	43.7087	65.6238
									74	72.5526	50.8111	58.7297	34.835	51.7662	26.8122
									75	44.9763	36.8493	17.3654	17.7648	14.7953	16.4277
									76	42.441	59.8411	25.5618	37.8565	19.866	27.6631
									77	43.7781	27.3678	40.9128	23.8948	15.4031	32.6817
									78	42.7883	22.5924	15.3336	21.1684	72.7089	26.569
									79	20.9947	26.378	21.863	40.9128	25.2319	24.381
									80	26.6906	25.4229	12.7288	19.3971	38.2212	50.8979
									81	42.4236	55.4477	11.4264	24.8499	37.0925	42.6146
									82	24.9888	52.0093	17.4869	26.1002	37.4398	40.5482
									83	16.3235	46.9386	32.5601	17.5738	15.0732	45.671
									84	15.3163	26.1175	35.5296	54.2321	32.6122	55.8123
									85	36.12	51.5231	39.8536	34.2098	26.0654	52.5824
									86	28.3924	53.2249	33.2026	29.9032	13.8402	14.6043
									87	27.7846	29.3475	70.1909	30.7367	19.9702	31.1188
									88	30.7367	70.2082	31.4487	30.2852	30.4762	55.2219
									89	94.7629	21.9846	54.2842	19.7097	59.216	35.2865
									90	39.8188	24.9193	35.3559	46.4524	34.5571	48.9877
									91	40.4266	35.8595	66.8046	25.6139	47.668	27.8193
									92	28.7397	18.4941	86.1497	38.5859	38.1344	44.3165
									93	35.026	44.9242	21.9672	32.1781	19.3277	33.3936
									94	39.9925	18.7372	20.5432	36.8667	58.2088	26.4996
									95	10.9055	37.3529	11.2528	66.0926	23.86	43.4308
									96	39.4889	64.5124	21.8804	23.8774	37.9955	52.3393
									97	98.1318	25.8918	53.2423	39.6452	18.6331	48.4147
									98	58.9728	31.0319	88.164	14.3438	11.7911	62.8801
									99	47.2165	43.0661	27.2637	31.223	18.8588	16.2193
									100	51.7315	35.1996	41.5033	21.0642	30.0595	32.2128
									101	32.7858	40.2356	16.2714	20.5606	34.696	26.9684
									102	66.2489	64.2346	22.9223	40.1835	16.6187	23.5648
									103	48.4841	84.1874	29.6774	60.5531	32.0912	34.8176
									104	45.9662	52.8255	26.1002	49.144	33.3415	34.4182
									105	15.1252	22.6792	86.5838	32.0912	36.3457	26.4996
									106	17.2959	11.4785	47.2338	48.7967	34.2619	43.4829
									107	16.7055	35.1996	13.9444	51.8009	16.5145	60.0495
									108	19.484	24.902	29.608	21.9846	47.7374	42.3889
									109	19.5013	44.5596	49.3351	36.6236	13.024	55.0309
									110	17.9905	42.7883	24.3984	19.6229	19.0325	37.0577
									111	14.4133	39.9751	38.6901	16.1845	37.3356	39.2979
									112	54.6315	23.5996	63.0884	32.6122	28.2361	36.8493
									113	44.8027	51.8183	25.9092	32.7858	23.3564	23.478
									114	17.7301	39.3673	12.2947	46.7997	14.5175	31.3272
									115	38.5685	22.0019	40.3051	31.4661	39.6973	18.9456
									116	19.8313	33.7409	38.8116	19.2582	31.1361	48.1368
									117	32.508	30.0421	23.7732	56.8369	65.2417	89.1018
									118	56.9758	42.632	38.0302	56.9237	35.5817	40.9649
									119	36.1374	63.0363	31.1361	49.9255	38.4122	12.3815
									120	18.1816	34.5745	44.5943	51.5578	39.3847	32.6643
									121	22.8702	20.5953	68.6627	62.0812	64.9465	56.4375
									122	31.3272	34.2098	20.4217	42.4063	29.8164	22.3145
									123	35.9811	13.1803	12.451	29.0523	31.7092	43.0661
									124	34.2445	31.9697	24.6241	33.2547	48.6231	11.9127
									125	50.6722	23.0612	13.1456	45.7751	26.378	15.6115
									126	31.9002	36.5715	43.2224	43.7087	26.899	42.8751
									127	53.9369	46.6781	29.5038	38.4296	23.4606	53.659
									128	64.2346	28.7744	39.1416	33.3415	51.9051	30.2679
									129	39.9925	59.7369	64.7729	98.7569	47.4422	65.3112
									130	45.7925	90.3868	20.4391	47.0428	35.7901	25.8571
									131	26.6732	44.7159	19.5882	33.9667	42.0069	30.9277
									132	43.535	48.7273	33.5847	39.35	47.0602	41.8158
									133	28.9134	27.9409	14.8474	18.251	41.4512	35.2691
									134	66.2489	17.2091	28.4098	33.2721	46.2614	55.1872
									135	55.4824	30.511	12.7983	28.7397	93.6515	69.4442
									136	32.2649	18.6678	23.6864	30.1289	49.7866	37.0751
									137	50.5506	41.3122	51.9225	65.4849	50.7937	85.4724
									138	28.6182	15.9241	24.1726	57.0106	54.5968	25.3708
									139	27.993	42.1631	40.7739	47.859	33.1158	100.667
									140	35.8769	47.6506	106.068	53.4854	27.7672	43.6218
									141	39.923	20.6822	24.2594	63.731	45.1847	46.5392
									142	33.1332	31.7787	38.9679	61.595	30.0942	26.6906
									143		57.9309	21.1337	47.4596	70.8334	57.5315
									144	38.0476	31.6918	10.8707	31.7266	47.0949	18.2857
									145	11.5653	44.9069	23.4085	37.7176	26.6385	16.4277
									146	36.5541	40.5655	26.8295	27.5241	23.3564	21.672
									147	26.2738	30.2331	28.9307	36.0853	68.5585	48.953
									148	27.3331	37.6481	70.7639	65.8843	58.2956	43.7955
									149	13.3366	27.8541	37.3008	13.2498	42.8751	37.405
									150	25.2319	36.0679	48.0326	78.9951	13.2324	38.308
									151	55.3261	51.28	31.4661	27.09	26.9337	27.0205
									152	30.3373	42.8057	45.4799	64.8944	39.9577	30.8236
									153	40.2877	20.5432	56.698	12.5378	56.889	30.511
									154	38.4991	48.9704	19.8486	32.8206	60.5184	23.4606
									155	43.0314	46.2093	18.251	73.8376	39.6625	23.4954
									156	18.4247	30.3026	38.3254	31.2577	100.077	30.511
									157	23.7732	43.344	23.8774	31.6745	57.0626	74.6017
									158	13.8228	50.4464	13.0067	36.1895	22.8355	33.7583
									159	14.4827	32.4212	40.9128	61.0741	43.0314	40.114
									160	32.4733	54.3363	45.3757	22.7487	23.8948	22.2277
									161	31.0667	37.9434	13.4582	27.7499	38.7769	22.2624
									162	21.2726	119.908	19.2408	15.4031	28.514	28.4792
									163	20.4043	47.9979	41.8853	35.5122	54.8572	61.0741
									164	101.865	35.2344	43.0488	18.9109	53.6417	26.899
									165	58.1914	34.6787	20.8558	23.669	25.5445	20.4738
									166	28.1146	68.5933	14.4827	17.4696	27.8888	45.5147
									167	48.1716	72.2226	42.5278	15.5767	10.9055	38.4643
									168	30.6325	32.2822	27.3505	57.9483	42.1805	11.1312
									169	49.6476	32.0912	29.3822	18.9283	45.0805	20.8037
									170	11.4438	65.8322	14.3959	14.6737	15.1426	64.2519
									171	22.1582	13.1282	26.6211	26.2565	20.0917	24.4678
									172	64.1651	39.5583	37.4224	31.8481	26.6906	35.6859
									173	56.8716	23.7211	25.4577	12.121	30.702	30.5978
									174	42.0416	17.8516	23.2522	58.2609	34.4008	48.7794
									175	24.3289	54.5099	29.6427	32.4212	19.2408	40.826
									176	73.2298	26.8295	11.7216	38.5859	32.4038	35.8769
									177	12.1905	49.8386	14.7085	38.0823	40.8434	63.4184
									178	40.253	40.826	28.3056	25.475	40.5308	40.635
									179	65.3459	32.9248	100.424	43.6739	46.4698	29.0002
									180	44.1428	22.8181	43.5524	62.0291	39.8188	32.2128
									181	93.8599	14.1528	38.8811	41.9895	33.7757	50.4291
									182	43.0488	39.2979	29.1217	44.8027	40.3919	46.8344
									183	46.4698	37.8565	54.9267	26.5864	57.0974	25.5445
									184	13.9791	33.4978	30.4589	21.8977	35.7206	33.9493
									185	33.0811	28.2187	20.0223	43.535	38.1344	73.5598
									186	31.7092	44.5769	13.927	62.3765	35.026	20.4217
									187	31.9697	40.2877	30.9451	33.602	21.4636	42.7015
									188	44.9416	19.7444	37.6134	23.6169	42.9099	29.99
									189	25.666	42.0242	19.5187	32.317	30.0768	14.5522
									190	36.2416	39.0547	76.6161	16.9139	21.0642	28.3924
									191	49.4219	52.9471	31.2924	42.8925	30.0074	52.9297
									192	38.2038	43.7434	25.5097	13.024	34.6613	17.1223
									193	44.8201	27.5415	72.622	30.0595	29.8685	32.126
									194	38.4122	77.7622	43.4482	52.8255	52.2177	44.247
									195	43.0141	45.1847	16.1151	47.3207	62.4459	43.7608
									196	16.3582	23.1307	46.8692	56.7327	24.1552	26.2738
									197	24.6241	57.983	50.4117	27.4547	20.0744	57.8615
									198	44.4554	47.0949	18.4247	34.2272	11.7216	38.2212
									199	21.1858	28.2882	25.7355	45.341	11.4785	61.6645
									200	33.8972	49.2482	47.668	31.084	30.7367	46.8171
									201	39.4021	28.0798	56.8543	42.1805	62.8627	13.6839
									202	39.4368	31.1188	92.4186	36.8841	46.5913	28.7744
									203	43.8476	23.478	22.1061	47.6853	27.8714	15.4031
									204	75.7999	60.8657	14.969	28.514	32.2302	20.6474
									205	42.2847	81.5999	25.8918	27.6804	28.2882	14.0312
									206	34.6613	33.0463	21.0121	29.99	18.8414	59.0076
									207	36.1547	29.278	16.4624	31.6745	54.7531	28.6529
									208	20.5606	53.7806	36.3805	34.4182	24.7109	12.4336
									209	24.2768	52.5824	23.2696	38.6032	15.8546	22.5576
									210	60.7962	15.5767	17.7822	28.4619	44.9937	19.1193
									211	31.1361	24.2594	11.6869	45.3757	31.987	48.2237
									212	33.5673	30.3721	54.2147	15.4899	24.5199	18.251
									213	27.993	18.442	33.8972	29.7643	30.8409	31.8481
									214	52.9123	19.9528	46.7302	25.1972	26.3607	28.9481
									215	23.2696	41.8679	51.8183	23.0265	30.7715	22.2972
									216	24.0337	50.7069	46.1051	36.3978	28.9828	23.6343
									217	22.575	53.3812	43.3093	83.267	39.4021	18.6852
									218	46.6781	58.9555	34.2966	10.9576	45.1847	37.2314
									219	34.505	48.1889	17.9558	17.9037	47.859	39.4541
									220	27.4547	56.7153	104.626	39.35	42.3368	20.2828
									221	45.9314	46.1225	32.3343	27.0032	44.768	30.0074
									222	59.7369	44.1254	59.2854	39.0374	29.7295	20.5432
									223	51.0716	41.92	48.7794	32.8206	11.9647	36.8493
									224	36.5715	27.5589	35.6164	45.532	33.3763	39.7667
									225	18.1642	16.1845	64.9292	20.8558	31.605	30.0421
									226	72.761	14.3785	89.0323	18.4941	37.7002	20.1786
									227	19.4492	42.3889	109.61	21.481	25.8918	44.3338
									228	24.7109	22.7139	28.4966	66.0926	38.0476	47.338
									229	34.9392	13.0588	15.6809	46.6261	52.3219	32.7337
									230	89.9527	75.1747	47.8243	58.0004	33.8972	16.0282
									231	27.7152	14.6043	22.3319	18.8414	34.0188	63.0363
									232	14.1528	83.1802	25.7355	32.2996	36.1547	15.1947
									233	29.5906	53.9195	16.5492	27.4026	20.3001	27.5762
									234	36.3978	42.4584	19.345	14.6217	43.1009	12.6073
									235	11.1138	13.9965	69.5657	17.8169	74.2544	58.0872
									236	41.7116	24.3463	62.0465	54.8399	19.2582	26.378
									237	28.514	16.1498	14.1007	49.4045	43.865	19.484
									238	55.5519	20.5432	11.357	29.3301	19.4492	17.6259
									239	11.2701	13.6492	13.8923	63.8699	39.2631	86.9311
									240	17.3827	52.4087	18.0079	57.6878	50.9674	18.4768
									241	11.6348	33.9841	12.642	52.9471	50.7764	20.2654
									242	48.4668	35.7901	23.5475	45.9662	37.8044	106.259
									243	106.623	19.8313	27.2463	31.414	33.7236	11.1312
									244	80.2975	50.1512	17.4175	44.5769	72.7783	85.1946
									245	14.7779	20.4043	26.4301	14.2917	39.6278	21.9846
									246	13.8402	30.9625	22.0367	30.0768	43.7781	46.0977
									247	14.1354	48.8488	17.2438	19.1367	45.9314	48.9684
									248	19.9181	26.5343	16.7402	25.8397	25.1277	22.384
									249	16.9486	34.4008	18.7199	41.8853	46.1746	47.5539
									250	18.963	34.3835	53.277	12.8504	15.733	31.9106
									251	30.8583	46.0877	23.2522	67.1519	24.6762	37.4024
									252	17.348	16.5492	53.5375	58.504	36.3631	32.3266
									253	25.9092	16.6013	21.0642	27.5415	12.4336	27.3757
									254	11.3396	35.1128	26.8122	63.0711	93.8078	49.6757
									255	47.4596	47.2512	54.9962	44.1949	25.5271	54.377
									256	25.3187	20.1612	22.6271	45.532	50.7416	85.4555
									257	13.7187	54.1453	27.5415	40.2009	51.662	38.4841
									258	40.9476	19.484	51.2105	71.9274	33.6888	35.1557
									259	48.8315	34.9912	39.4194	11.6174	52.4782	29.3311
									260	28.1667	20.5606	27.1247	50.7416	55.6213	44.808
									261	31.8134	51.5405	33.2894	55.9686	36.0679	48.0947
									262	49.0225	40.114	36.1026	46.5045	61.595	84.0825
									263	41.2081	23.2696	32.9769	84.6389	50.7937	45.1408
									264	17.9211	22.3145	26.3433	28.2361	35.3386	37.4856
									265	53.659	31.1535	14.7606	30.7715	29.6253	36.1126
									266	29.9379	26.2912	26.6906	32.0044	89.4317	49.4677
									267	51.0542	27.7499	12.8851	43.0835	27.5241	41.6044
									268	21.7936	37.6134	25.996	21.1337	29.6427	27.875
									269	30.2852	25.2319	48.7099	18.2684	14.1181	55.0427
									270	30.511	28.705	37.5961	30.6673	22.0888	45.6401
									271	36.8841	39.6278	31.7092	26.2738	22.8702	31.6194
									272	54.9093	27.3331	44.3512	44.0907	37.3008	40.6891
									273	36.12	45.7057	27.2637	25.7008	20.1091	37.444
									274	31.6224	34.3835	31.605	16.1151	20.9774	73.2238
									275	48.4321	39.732	12.6767	32.4385	33.5499	66.0262
									276	36.9535	35.4601	33.9146	47.9458	50.3249	40.5643
									277	29.1565	35.3733	52.0267	27.6804	51.0716	57.0813
									278	10.6971	32.1433	31.414	24.381	54.5273	55.1675
									279	31.0493	39.923	33.3415	23.7558	54.6489	31.6194
									280	13.5276	22.4534	30.5457	33.5326	30.8062	46.6386
									281	15.4726	29.5906	24.4505	41.8158	17.1223	31.0785
									282	56.0902	17.7995	93.1826	56.3507	36.3631	35.863
									283	53.9021	45.6883	18.0079	36.4847	28.4445	37.1111
									284	14.2222	30.2852	25.805	45.8967	32.6469	31.7026
									285	38.5164	42.6861	16.5492	33.1505	32.5775	28.3742
									286	22.4882	31.3281	17.5911	23.3738	28.1667	39.233
									287	42.3194	65.3189	21.5678	29.9727	45.15	27.4589
									288	26.708	117.99	40.0272	43.9171	23.5475	65.7766
									289	29.4517	26.4188	67.4819	34.0882	31.1882	42.0205
									290	33.8972	39.6906	29.4864	31.605	50.568	43.6846
									291	12.3121	35.1141	16.0109	25.2319	24.6588	44.5999
									292	46.2266	55.7499	53.6069	21.4115	96.5689	46.3057
									293	20.8732	31.4529	27.7152	44.0212	74.6538	41.5212
									294	13.736	37.236	19.6229	16.2366	41.7464	55.7915
									295	45.0458	37.9848	13.0588	33.7062	21.672	36.5703
									296	22.0714	41.1052	148.861	30.9972	27.8541	40.8972
									297	41.3817	108.962	45.8065	29.1391	18.9977	34.282
									298	37.735	76.3441	69.6042	55.5345	23.2349	112.873
									299	20.0049	53.9193	158.097	28.514	18.0079	63.946
									300	35.7206	54.1274	121.859	15.9414	25.8744	90.6976
									301	20.9253	53.8361	77.3842	20.1091	13.2672	43.8927
									302	45.3236	39.8154	55.7915	39.1589	70.6076	90.656
									303	29.278	40.0235	46.5554	57.271	18.0079	45.016
									304	43.8476	39.8154	33.658	23.3217	22.4187	30.288
									305	23.3738	71.4764	50.5078	37.214	29.7643	41.5212
									306	81.843	63.738	43.2686	15.3857	61.3866	27.0013
									307	32.5948	29.9136	42.811	36.2589	41.0518	44.4335
									308	24.3636	74.6799	31.4529	35.7553	56.7153	92.9859
									309	43.344	72.891	68.2313	24.19	21.9846	31.869
									310	56.9932	43.227	43.6846	32.5254	11.4785	39.1082
									311	14.8474	26.9597	44.9744	51.0195	23.2002	66.9415
									312	66.2837	65.4022	59.5775	39.8188	29.5732	61.4081
									313	36.3207	48.4692	68.1064	41.9374	46.4524	56.374
									314	64.9445	27.6669	85.4555	23.9816	25.4403	33.658
									315	45.6817	30.7457	41.1468	124.439	24.7457	52.3384
									316	41.8957	64.6949	51.2567	26.6684	48.7794	38.4425
									317	43.8511	29.7056	45.3072	29.872	13.6492	59.8688
									318	64.4453	67.316	31.7858	41.2716	52.6296	31.8274
									319	59.2031	34.8229	48.6772	52.172	67.2328	171.119
									320	37.6936	39.3994	73.4318	74.6383	50.591	35.4886
									321	29.2895	55.9163	35.3638	44.6832	50.5494	48.8852
									322	96.3559	44.6415	45.6401	34.282	36.6119	55.9163
									323	26.0444	86.9116	96.4391	43.3934	94.3172	36.4039
									324	46.0145	71.8508	47.9699	40.7307	46.5554	26.2108
									325	60.2848	49.5509	44.4751	49.01	39.5242	67.6072
									326	78.2163	84.1242	62.9891	34.0324	29.872	34.9477
									327	41.1468	56.2492	92.0706	53.3785	57.0813	134.923
									328	36.4455	51.5063	56.2492	42.3117	31.7026	30.9121
									329	30.3296	39.5242	58.1214	43.9759	47.2626	181.562
									330	49.9253	58.7454	52.2552	36.5703	50.1749	51.7143
									331	79.8805	106.882	45.3904	41.8541	42.3533	79.4228
									332	51.9223	49.7173	37.86	37.7352	37.2776	42.1037
									333	72.1005	41.3132	68.6889	34.7397	39.8154	41.9373
									334	57.2477	44.7248	52.588	35.447	69.8954	66.0262
									335	32.5763	32.6179	43.5598	26.3772	41.6876	100.974
									336	81.9191	36.1126	38.2345	85.1643	43.1854	45.8897
									337	31.4946	50.799	27.5837	64.1956	27.9166	51.8807
									338	39.1498	67.2744	106.632	41.5212	39.025	73.3486
									339	43.5598	32.7011	30.4544	37.4856	37.9432	48.1779
									340	62.9891	67.5656	49.8837	37.0279	31.3281	77.0098
									341	57.7053	39.0666	49.3845	39.233	58.7038	39.8986
									342	45.432	42.2701	67.1911	47.013	45.9313	27.0013
									343	32.7427	79.4645	31.1201	49.7589	61.6578	48.7188
									344	60.576	43.8511	53.5033	36.1959	28.7487	33.6996
									345	26.9181	56.9565	44.5167	45.9729	29.0399	55.8331
									346	34.7397	43.7679	64.4869	33.2419	49.9253	44.0591
									347	49.9669	55.5835	63.6132	33.9076	56.7068	36.1959
									348	80.4214	39.5242	57.2477	26.9597	46.805	32.8675
									349	65.3189	39.441	68.4393	31.661	34.0324	34.6565
									350	55.1675	62.157	102.222	45.8481	35.447	50.4662
									351	41.6876	40.6059	34.8229	50.591	57.8302	25.878
									352	71.6012	43.227	27.5005	30.6209	25.6699	53.4617
									353	52.588	52.7544	39.8986	43.1438	38.8169	41.2716
									354	44.9744	72.5997	40.3147	35.1141	81.2118	53.7113
									355	59.4527	44.6415	44.1007	36.8615	38.3593	32.8675
									356	58.2462	68.1064	48.9684	28.7487	84.7066	37.6104
									357	49.8837	62.157	94.3588	52.796	50.0501	29.2895
									358	123.732	69.3962	29.1231	67.5656	37.5688	31.4529
									359	41.646	29.2895	31.9522	41.6876	39.9402	79.5061
									360	26.294	52.0055	41.4796	35.9878	30.4128	38.0681
									361	41.7292	44.1423	80.2133	38.6921	33.866	29.1647
									362	29.4143	36.1126	53.004	50.799	44.3503	31.4946
									363	52.4216	30.9121	32.5763	49.1348	30.1216	26.502
									364	54.169	33.45	86.7868	49.01	40.8139	58.9535
									365	41.5212	39.8154	66.8167	55.7915	32.7843	40.3563
									366	58.2046	65.1109	34.074	60.5344	64.8197	62.0738
									367	40.4395	35.9046	29.1231	50.0917	48.594	34.4901
									368	44.7248	46.9714	56.7484	66.6503	47.9283	63.0723
									369	36.1959	43.1438	46.8466	33.866	47.5123	34.1988
									370	48.1363	55.3339	38.2345	40.6059	54.9178	39.233
									371	54.4602	33.866	26.2108	42.2285	47.2626	52.2552
									372	48.1779	55.8747	51.5479	85.2891	67.524	32.7843
									373	41.0636	32.9923	38.6921	42.4781	30.2464	28.5822
									374	37.4856	31.0369	28.291	49.1764	52.2136	47.1794
									375	48.0531	48.2195	41.022	42.3949	34.6981	35.4054
									376	43.6846	37.8184	31.7442	44.6832	67.3992	48.1779
									377	39.6074	48.7188	45.4736	28.291	69.521	67.316
									378	35.7382	46.6386	36.6951	54.0858	40.0235	50.1333
									379	47.5123	35.5718	52.9208	31.7858	69.8122	70.2699
									380	59.4111	53.4201	52.3384	37.2776	67.8984	261.151
									381	44.1839	38.4425	33.2419	58.7871	47.6787	56.166
									382	34.1156	34.1156	59.744	53.004	40.6059	208.105
									383	29.4559	29.7888	33.2419	33.4084	32.1186	164.504
									384	27.7502	54.7098	26.502	37.5688	28.2494	89.9072
									385	32.285	37.2776	37.9016	41.438	32.077	58.579
									386	31.2865	32.4098	40.9804	30.4128	25.878	30.8289
									387	34.5733	29.4975	32.6179	39.8986	64.0708	56.6652
									388	36.3623	36.0294	47.013	13.6145	58.2878	65.9846
									389	44.1423	32.9507	44.2671	31.7442	59.4527	47.4707
									390	30.4544	62.9891	40.6475	27.9998	48.4692	27.7918
									391	43.6846	55.2091	30.8289	54.793	43.3518	57.7469
									392	26.8349	36.4039	53.7529	31.3281	57.4557	25.9612
									393	55.7915	35.7382	35.4886	73.723	34.8229	83.1256
									394	32.2434	38.1097	34.3653	44.2255	54.0441	63.1555
									395	55.958	34.1572	51.6727	66.0678	56.166	49.6757
									396	60.7009	28.1662	28.7071	37.1111	54.377	28.4158
									397	30.496	57.2477	41.7292	29.6224	85.9131	46.8466
									398	38.9417	45.5985	42.7277	36.4871	35.0725	41.646
									399	46.5137	26.6684	27.4173	49.6341	39.233	27.0429
									400	63.3219	63.6964	58.0382	26.8765	28.083	68.6473
									401	47.8867	27.3757	26.5436	51.7143	57.6637	81.3783
									402	30.6209	47.3458	34.4069	45.3904	46.9298	77.2178
									403	37.1944	44.1007	40.9388	38.9417	38.9417	38.0264
									404	43.435	57.2893	26.7516	43.1022	37.4856	66.151
									405	61.4913	49.8005	36.9863	61.949	28.8735	54.9594
									406	45.7233	31.1617	34.4069	55.7499	47.5123	154.56
									407	36.9863	29.3311	30.2464	34.1988	49.0516	45.5568
									408	35.7798	26.7933	160.094	44.1423	28.9983	27.5005
									409	37.9848	39.0666	66.2342	30.7873	44.2255	43.3102
									410	138.085	33.4084	76.5937	46.3473	70.9355	33.8244
									411	64.5285	34.1572	95.815	34.2404	55.4171	49.1764
									412	39.3994	58.2878	36.4455	37.4024	26.5852	72.5997
									413	134.466	34.074	61.5746	33.6996	49.8005	44.2255
									414	35.8214	38.0681	35.5718	48.4276	37.6936	38.0681
									415	56.0828	56.79	67.5656	67.316	32.9091	52.2552
									416	33.6164	94.7333	44.1007	60.7009	38.9833	37.652
									417	48.3443	34.6565	41.646	39.7738	32.2018	46.7218
									418	28.083	41.9373	51.8807	38.6505	73.515	40.3563
									419	72.5165	45.224	52.3384	34.0324	34.4485	49.3428
									420	36.1126	58.2462	44.3919	27.3757	73.8063	70.6027
									421	52.7544	34.5317	57.2893	37.4856	33.2003	26.9597
									422	54.2522	34.2404	26.5852	35.655	37.5272	41.23
									423	41.3548	41.8541	67.5656	32.3266	95.1493	49.01
									424	39.649	49.8837	47.0546	54.0858	37.3608	33.2419
									425	49.6341	94.5669	29.872	36.3207	35.1557	93.2771
									426	78.2579	45.7649	32.7427	32.1186	66.9831	40.4811
									427	60.4928	46.4305	39.8154	28.8735	36.9031	45.0576
									428	52.0055	54.4186	62.5315	34.6149	47.3458	45.7649
									429	33.2419	35.6134	53.7945	48.1363	79.7141	59.9104
									430	42.6861	30.8289	62.0738	37.3192	42.1037	53.7529
									431	56.7484	40.2315	49.1348	28.3326	47.5123	46.7218
									432	50.7574	28.3326	100.808	58.4542	61.2417	30.0384
									433	29.872	67.0247	67.3992	30.8705	68.1897	55.4171
									434	46.3889	25.9612	30.4544	27.875	114.745	51.2567
									435	42.6861	31.869	100.683	29.0815	46.2641	53.7945
									436	49.4677	53.3369	37.9432	69.8954	26.9597	89.9072
									437	42.0205	42.811	131.595	29.4975	32.8259	30.8705
									438	42.6861	45.7233	43.1438	51.9223	60.368	47.1378
									439	68.1064	33.6996	51.6727	41.0636	39.6906	49.8421
									440	92.029	51.3399	33.2419	60.1184	40.3563	38.9417
									441	37.6104	61.9906	47.0546	41.9789	38.9001	41.1468
									442	43.0606	43.6846	49.0516	62.2402	56.4156	40.2731
									443	56.0828	69.6458	44.3087	48.1363	52.38	32.4931
									444	64.3204	33.9076	32.0354	33.9492	38.8585	53.6697
									445	61.1169	38.3593	33.9076	37.5272	39.3578	28.499
									446	36.1959	42.1453	93.5684	51.5895	45.1824	53.9193
									447	40.6059	45.0576	41.3964	43.6846	29.7888	36.3623
									448	40.6059	50.0917	54.4186	64.5285	54.4602	32.0354
									449	47.0546	37.0279	120.653	33.866	29.8304	36.7367
									450	35.0725	45.5152		30.0384	43.227	54.6682
									451	43.435	35.8214		40.0651	65.735	28.8735
									452	43.1022	51.6727		26.502	53.2953	80.8374
									453	42.2285	42.5613		46.6386	31.4946	69.937
									454	39.0666	32.1602		31.661	34.1156	69.2298
									455	28.0414	43.0606		31.2033	40.9388	103.013
									456	40.3979	57.7469		31.4946	27.2925	40.5643
									457	37.6104	49.7173		37.4856	28.8319	29.2063
									458	26.2524	47.013		42.9358	33.658	50.0501
									459	36.071	34.0324		36.4871	39.5242	65.6102
									460	66.6919	39.857		32.4931	27.9582	57.9966
									461	32.9923	71.4348		27.4589	29.0815	33.9076
									462	67.524	56.0828		42.3949	42.3117	112.582
									463	41.5212	56.0412		27.2925	43.4766	27.7085
									464	89.3247	25.9612		27.9998	31.9938	30.1116
									465	54.8346	52.5048		29.7472	46.2225	38.2345
									466	27.9998	91.9458		31.4113	39.9819	37.444
									467	28.9567	45.3904		59.5775	36.3207	37.4856
									468	35.447			46.4305	40.8555	32.5347
									469	36.2375			43.1438	30.08	39.2746
									470	38.9001			38.3593	42.2285	39.9402
									471	77.7587			27.5837	31.5362	31.2033
									472	31.3281			46.5137	48.0115	65.6102
									473	32.1602			36.6951	56.6236	57.4973
									474	48.6356			75.3872	26.5852	40.8972
									475	42.1453			41.8541	44.0175	55.0011
									476	46.2225			37.4856	60.2432	35.1973
									477	51.5895			34.074	31.6194	31.9522
									478	93.8596			35.0309	28.9983	60.2432
									479	79.2564			32.2434	47.9699	68.1481
									480	60.3264			48.3027	47.7203	229.116
									481	36.6535			35.3638	47.9699	35.9878
									482	45.6401			63.0723	57.2477	32.8675
									483	41.9789			102.763	54.5018	40.4395
									484	29.4559			27.7085	38.0264	57.3309
									485	75.5536			69.8954	55.1675	27.3757
									486	33.0339			27.0013	35.4054	84.2906
									487	37.1528			63.1139	46.5137	54.6266
									488	149.734			43.1854	52.6712	27.2925
									489	28.2078			98.3113	34.6149	49.1764
									490	27.8334			56.6652	51.007	26.3772
									491	34.4901			55.2507	47.221	64.4869
									492				91.5297	54.2938	42.0205
									493				48.802	41.7292	36.1126
									494				58.1214	40.6475	40.7723
									495				26.5436	28.0414	49.2596
									496				35.9046	34.4485	48.4276
									497				47.3042	58.9951	47.6371
									498				39.025	28.2078	35.0725
									499				36.5287	83.7081	35.1557
									500				31.2865	34.1572	47.4707
									501				55.0427	71.102	118.864
									502				35.7382	39.8986	27.5421
									503				62.9475	74.0559	43.7679
									504				49.1764	52.6296	61.6994
									505				39.6906	51.8391	41.7292
									506				30.496	27.1677	63.0307
									507				44.1007	39.4826
									508				31.9938	53.5033
									509				87.3693	38.1097
									510				45.3072	37.9848
									511				94.7749	38.5257
									512				147.779	47.9699
									513				48.1779	34.3653
									514				25.878	51.8391
									515				36.1959	43.7263
									516				30.0384	32.077
									517				61.2417	26.7933
									518				37.6936	30.7457
									519				33.5332	30.8705
									520				40.1483	51.1318
									521				32.4931	39.649
									522				49.2596	54.377
									523				90.8225	70.3947
									524				35.2389	43.4766
									525				160.551	28.5406
									526				43.8095	49.8005
									527				28.6238	32.6595
									528				43.8927	52.7544
									529				43.8511	67.6072
									530				57.1229	33.5332
									531				33.3251	43.4766
									532				48.594	33.2003
									533				48.0115	27.1261
									534				82.3352	29.2063
									535				57.4973	36.4871
									536				43.8511	37.652
									537				45.6401	33.2419
									538				102.846	68.3977
									539				34.1988	49.8837
									540				35.2389	50.4246
									541				19.9408	30.4128
									542				14.7143	33.9908
									543				30.229	31.2033
									544				15.4677	48.7604
									545				21.1415	40.3147
									546				31.1707	28.083
									547				29.9465	27.2925
									548				16.7154	31.3697
									549				34.6315	49.2596
									550				25.2144	30.9953
									551				28.4398	83.084
									552				41.3413	52.5464
									553				34.0665	77.8003
									554				14.9733	27.5005
									555				38.3278	33.7412
									556				44.5666	47.6371
									557				26.0855	36.3207
									558				26.7682	39.441
									559				26.2503	54.0025
									560				20.4823	50.7158
									561				22.9778	47.3458
									562				19.7995	35.447
									563				21.1179	30.7873
									564				33.9017	41.0636
									565				30.3938	31.9106
									566				29.2167	40.0235
									567				14.9968	76.4273
									568				18.9755	36.4455
									569				14.5024	45.3072
									570				17.4923	41.5628
									571				29.7346	34.1988
									572				74.4896	36.3623
									573				28.6752	25.7115
									574				32.2537	39.1498
									575				22.507	50.8406
									576				39.5049	45.8897
									577				28.0395	54.4186
									578				35.4791	36.8615
									579				25.2615	64.6117
									580				37.3861	41.8124
									581				24.0373	34.1156
									582				51.5824	50.5494
									583				42.024	42.3949
									584				29.923	41.3964
									585				55.3728	33.5332
									586				27.451	54.0858
									587				16.5035	39.1082
									588				19.2345	54.0441
									589				32.3243	40.6059
									590				34.4667	37.6104
									591				20.6471	57.9966
									592				25.4969	47.1794
									593				20.7883	49.3428
									594				40.0699	31.2449
									595				24.2491	38.3593
									596				19.9408	48.4692
									597				27.6158	55.1259
									598				28.7458	49.3012
									599				23.1191	47.8867
									600				14.832	50.5078
									601				21.8242	72.3085
									602				38.7751	48.3443
									603				43.6014	42.4365
									604				29.7346	63.738
									605				24.3669	33.2419
									606				26.6741	33.658
									607				62.7653	43.1022
									608				28.5575	55.3755
									609				44.0958	53.2121
									610				20.1291	74.3887
									611				27.8747	67.5656
									612				35.4085	44.5167
									613				48.3335	53.4201
									614				23.9195	45.6817
									615				17.4923	65.943
									616				58.504	37.1528
									617				27.2862	77.1346
									618				26.7918	50.7158
									619				28.1573	38.2761
									620				28.275	45.0576
									621				25.0731	85.2475
									622				25.2144	50.1333
									623				27.0272	46.9714
									624				14.9733	83.0008
									625				16.8096	28.9983
									626				35.173	25.7115
									627				29.664	36.9447
									628					34.1156
									629					48.2611
									630					41.2716
									631					35.9046
									632					39.857
									633					57.5805
									634					31.7442
									635					50.4246
									636					58.8287
									637					49.9253
									638					46.0145
									639					36.5703
									640					59.9104
									641					36.5287
									642					31.7858
									643					58.579
									644					75.4288
									645					39.8154
									646					60.16
									647					37.444
									648					78.7156
									649					71.3932
									650					32.3266
									651					31.9522
									652					42.2285
									653					31.8274
									654					63.9876
									655					37.444
									656					35.0309
									657					31.2449
									658					38.1513
									659					40.9388
									660					28.7071
									661					39.7322
									662					61.741
									663					37.3192
									664					54.4602
									665					35.6134
									666					30.0384
									667					40.3979
									668					28.8735
									669					31.7442
									670					40.4811
									671					51.0486
									672					33.9908
									673					41.7292
									674					29.7888
									675					32.7011
									676					48.5108
									677					29.9136
									678					31.9522
									679					56.6236
									680					36.4039
									681					66.6919
									682					46.9298
									683					41.3548
									684					64.2372
									685					49.8005
