# Supplementary material for: An RNAi screen unravels the complexities of Rho GTPase networks in skin morphogenesis
Source: eLife journal article supplement (doi:10.7554/elife.50226), 2019-09-25
Supplement: supp [file elife_poa_e50226_Figure_2_figure_supplement_1.pdf › elife_poa_e50226_Figure_2_figure_supplement_1.pdf]

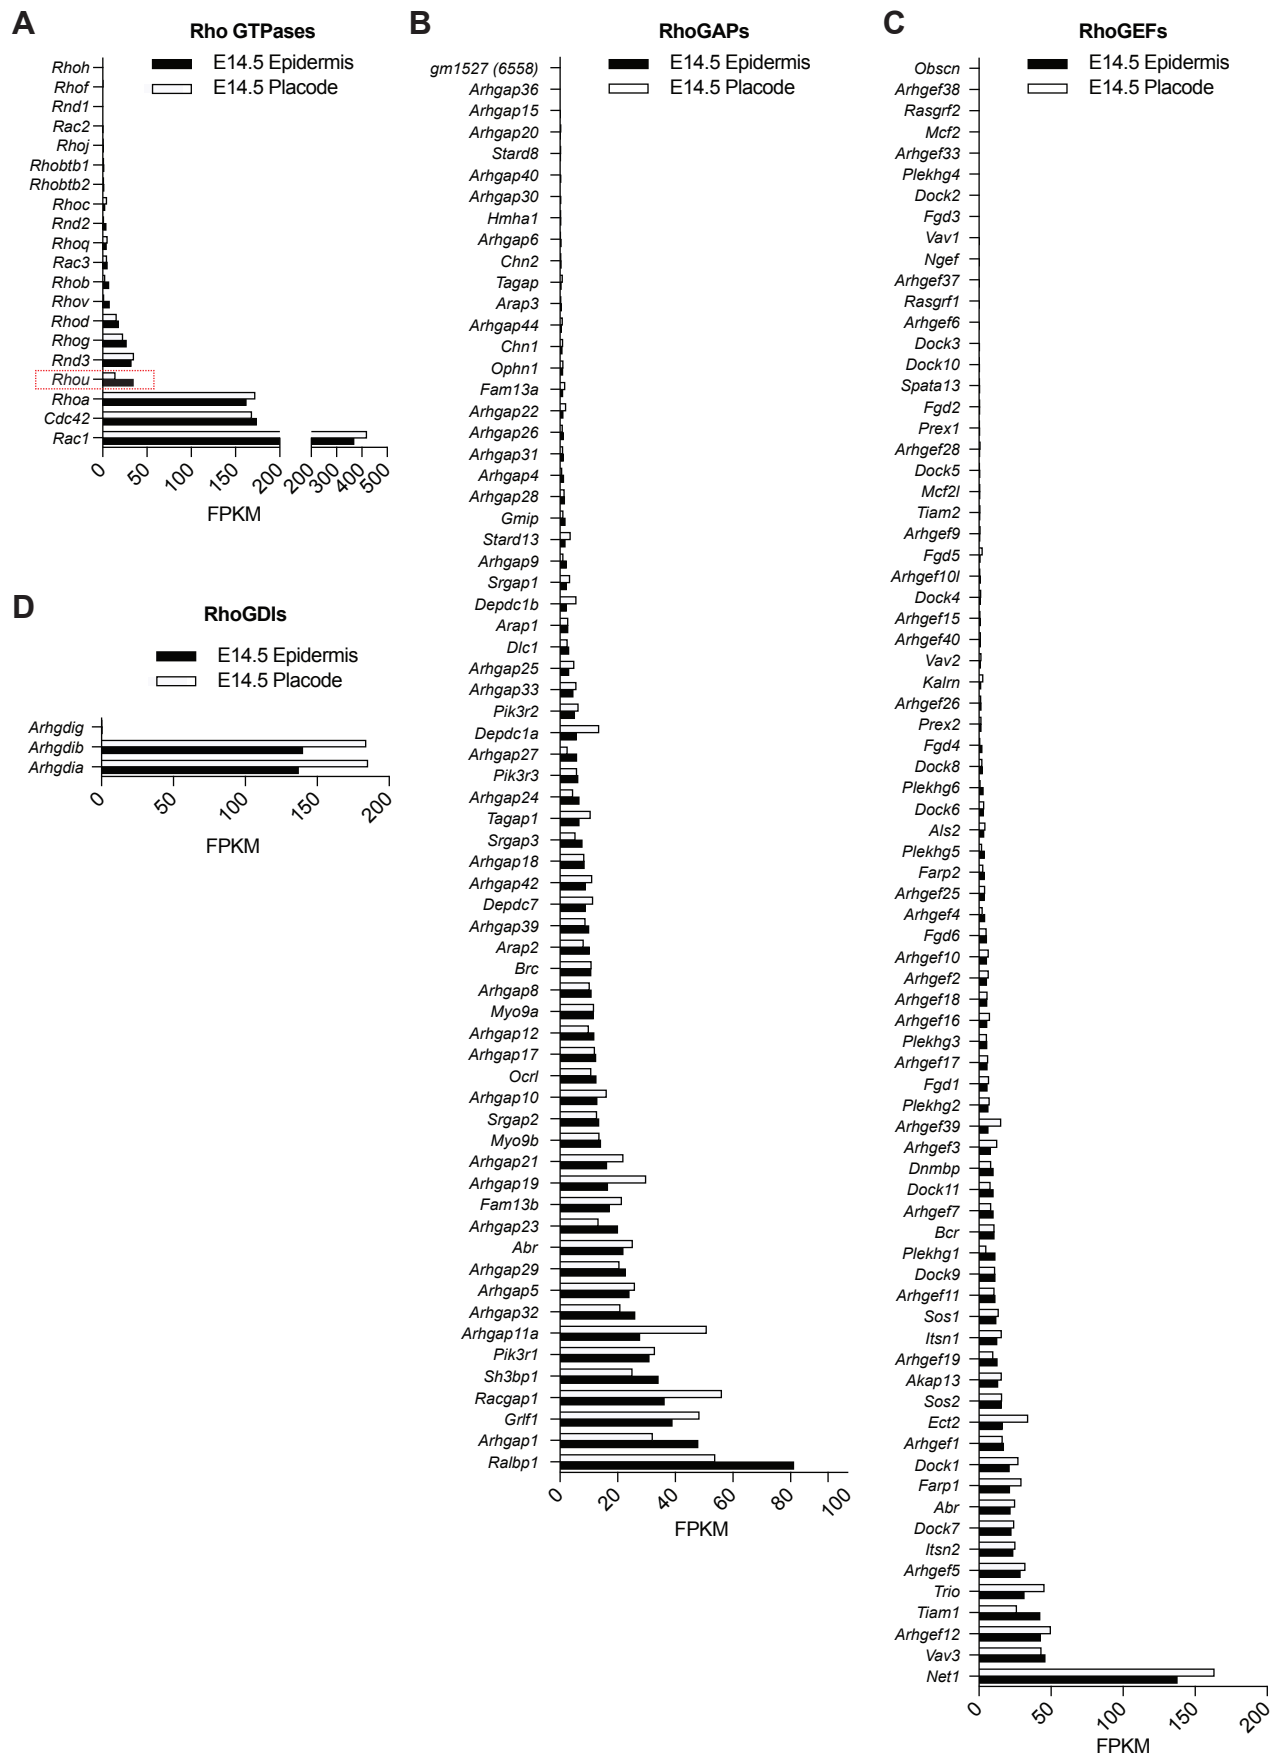

**Figure 2 - supplement 1.** Expression of Rho GTPases and their Regulators in Embryonic Epidermis Versus Hair Placodes. Transcriptome profilings of (A) Rho GTPases (B) RhoGAPs (C) RhoGEFs (D) and RhoGDIs in the epidermis and placodes of E14.5 embryos. Data are taken from the hair-gel platform (Rezza et al., 2016; Sennett et al., 2015). Note that expression of *Rhou* mRNA is reduced in the placode compared to the epidermis at E14.5
