# Supplementary material for: An RNAi screen unravels the complexities of Rho GTPase networks in skin morphogenesis
Source: eLife journal article supplement (doi:10.7554/elife.50226), 2019-09-25
Supplement: supp [file elife_poa_e50226_Figure_5_figure_supplement_1.pdf › elife_poa_e50226_Figure_5_figure_supplement_1.pdf]

**A****Perturbations in Actin and Adherens Junctions upon RHOU Knockdown**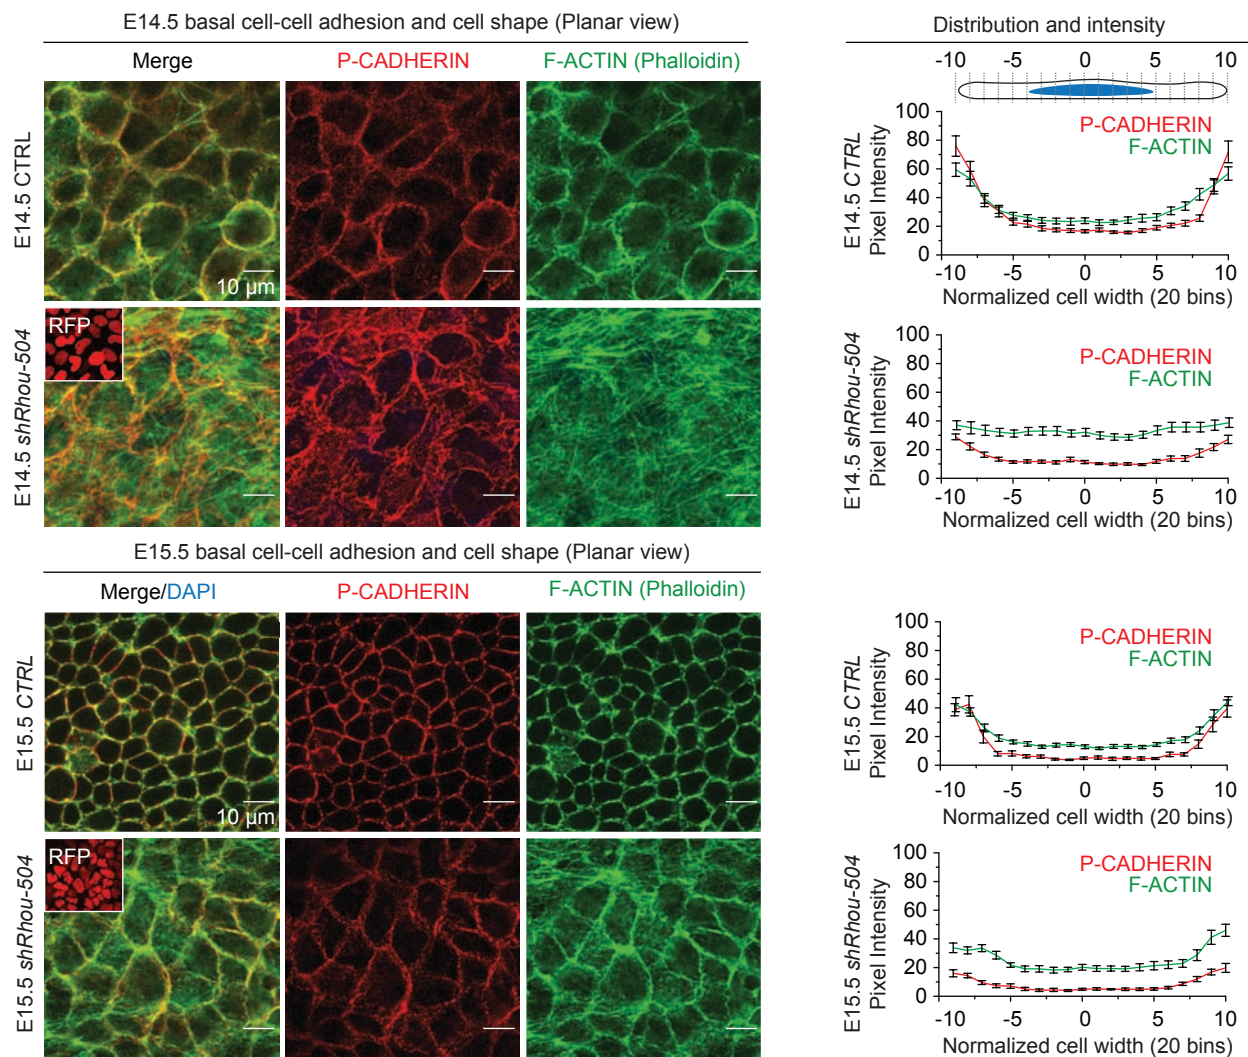**B Cell Shape and Density Perturbations upon RHOU Knockdown**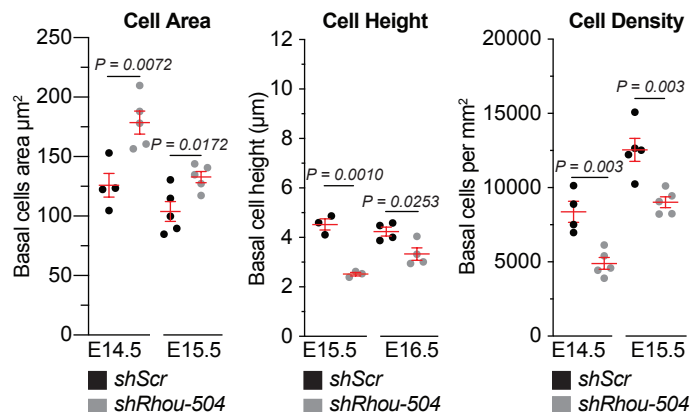**C****E14.5 Basal Cell Myosin**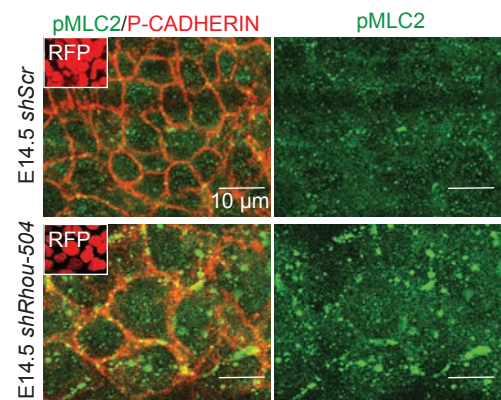

**Figure 5 - supplement 1. RHOU Depletion via *shRhou-504* Results in Analogous Defect in Orchestrating Cellular Junction Dynamics within the Developing Epidermis. (A)** Perturbations in cortical distribution of F-ACTIN and P-CADHERIN upon *shRhou-504* knockdown. Planar views from whole-mount immunofluorescence of transduced E14.5 (Top) and E15.5 (Bottom) head skins. P-CADHERIN marks adherens junctions, Phalloidin marks F-ACTIN, RFP verifies transduction. Shown are representative images from the midplanes of the basal cell layers.  $n=3$  embryos. Scale bars, 10  $\mu\text{m}$ . (Right) Pixel intensity measurements across the diameter of basal progenitors. **(B)** Cell area, height and density measurements reveal perturbations upon RHOU knockdown within the epidermal plane. For quantifications of cell area error bars represent SEM from E14.5 *shScr*  $n=4$ , E14.5 *shRhou-504*  $n=5$ , E15.5 *shScr*  $n=5$  and E15.5 *shRhou-504*  $n=5$  embryos. For quantifications of basal cell heights, error bars represent SEM from E15.5 *shScr*  $n=3$ , E15.5 *shRhou-504*  $n=3$ , E16.5 *shScr*  $n=4$  and E16.5 *shRhou-504*  $n=4$  embryos. For quantifications of basal cell densities, error bars represent SEM from E14.5 *shScr*  $n=4$ , E14.5 *shRhou-504*  $n=5$ , E15.5 *shScr*  $n=5$  and E15.5 *shRhou-504*  $n=5$  embryos. Normal distribution of the data was determined using the Shapiro-Wilk test. Parametric, independent, unpaired two-tailed  $t$ -test was used to compare the data. **(C)** Increase in the phosphorylation of Myosin II light chain upon *shRhou-504* knockdown. Planar views from whole-mount immunofluorescence of transduced E14.5 skins. P-CADHERIN and pMLC2 immunofluorescence. RFP verifies transduction. Shown are representative images from the midplanes of the basal cell layers.  $n=3$  embryos. Scale bars, 10  $\mu\text{m}$ .
