# Supplementary material for: An RNAi screen unravels the complexities of Rho GTPase networks in skin morphogenesis
Source: eLife journal article supplement (doi:10.7554/elife.50226), 2019-09-25
Supplement: supp [file elife_poa_e50226_Figure_6_figure_supplement_2.pdf › elife_poa_e50226_Figure_6_figure_supplement_2.pdf]

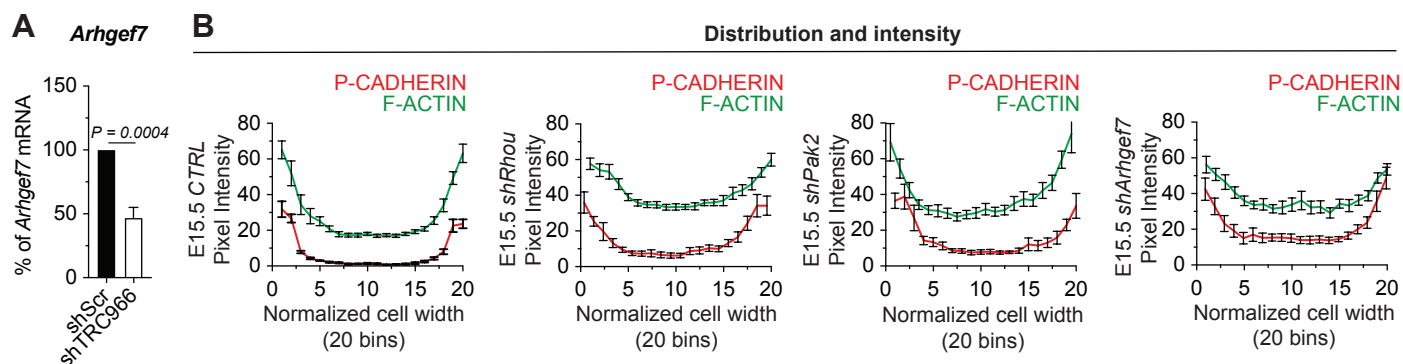

**Figure 6 - supplement 2.** Similarities Between RHOU, PAK2 and ARHGEF7 Deficiency Phenotypes in Skin. **(A)** qPCR analyses in mouse keratinocytes validate shRNA mediated knockdown of *Arhgef7*. Error bars represent SEM from n=8 experiments. Normal distribution of the data was tested using the Shapiro-Wilk test. Parametric paired two-tailed *t*-test was used to compare the data. **(B)** Pixel intensity measurements across the diameter of basal progenitors. Note the broader distribution of P-CADHERIN and the increase intensity of F-ACTIN in the cytoplasm of *shRhou*, *shPak2* and *shArhgef7*-transduced cells.
