# Supplementary material for: An RNAi screen unravels the complexities of Rho GTPase networks in skin morphogenesis
Source: eLife journal article supplement (doi:10.7554/elife.50226), 2019-09-25
Supplement: supp [file elife_poa_e50226_Figure_7_figure_supplement_1.pdf › elife_poa_e50226_Figure_7_figure_supplement_1.pdf]

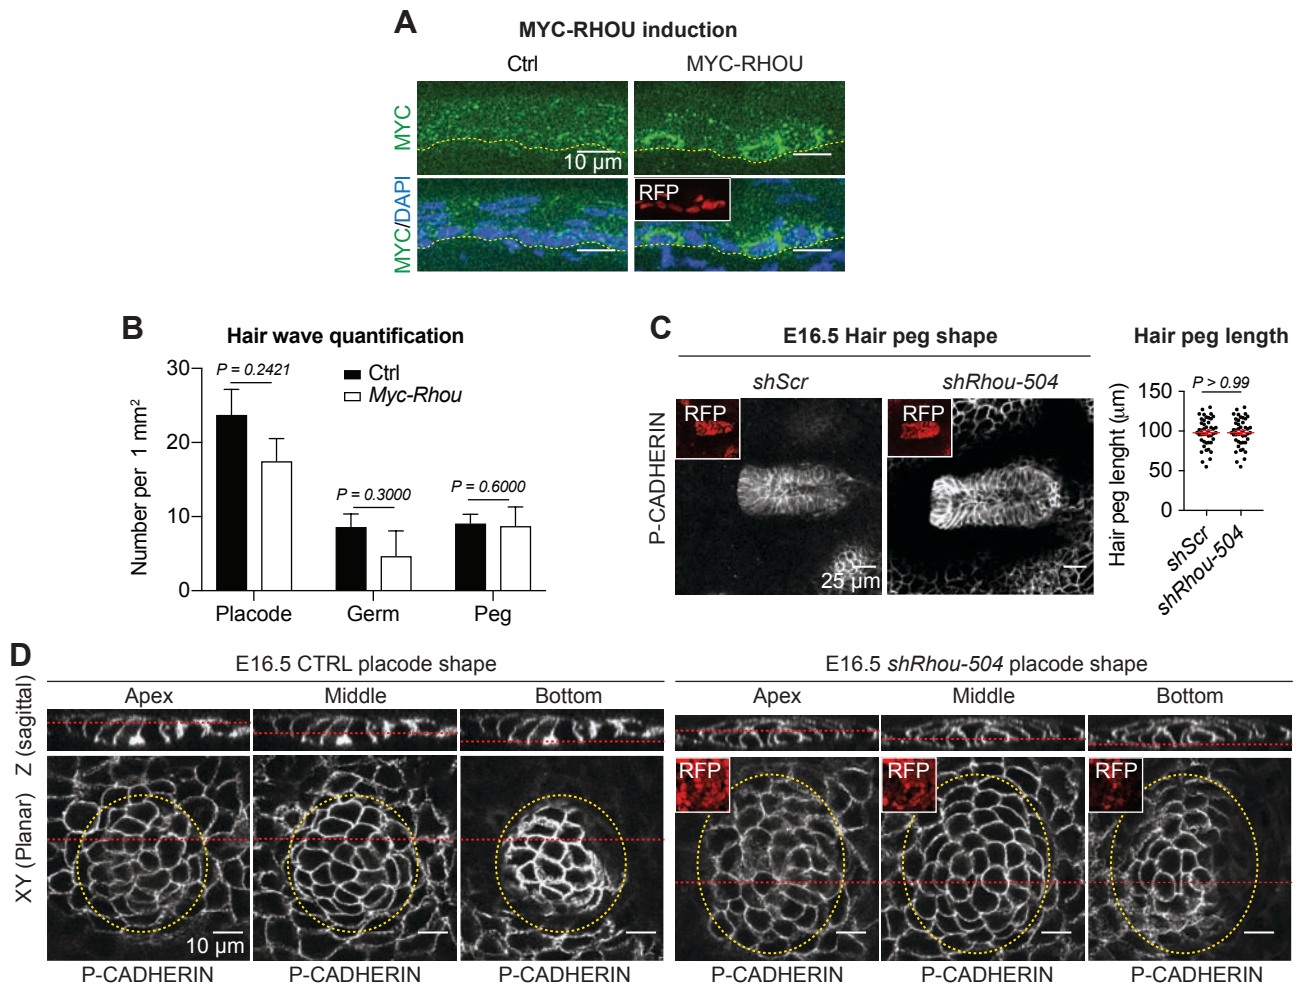

**Figure 7 - supplement 1.** Schematic Representation of RHO's Role During Skin Morphogenesis. **(A)** Immunofluorescence of sagittal sections from E16.5 Ctrl and *Myc-Rhou* transduced skins showing induction of MYC-RHO expression. **(B)** Quantifications of the numbers of hair placodes, germs and pegs from the staggered HF waves in Ctrl and *Myc-Rhou* transduced E16.5 skins. Error bars represent SEM from Ctrl  $n=3$  and *Myc-Rhou*  $n=3$  embryos. Normal distribution of the data was determined using the Shapiro-Wilk test. Parametric unpaired two-tailed *t*-test was used to compare the placode data. Nonparametric unpaired two-tailed Mann-Whitney tests were used to compare the germ and peg data. **(C)** RHO knockdown using *shRhou-504* in developing HFs does not perturb their downgrowth. (Left panel): Planar views from whole-mounts of E16.5 *shScr* and *shRhou-504*. Representation of  $n=3$  embryos. (Right panel): Quantification of hair peg length. Error bars represent SEM from E16.5 *shScr*  $n=45$  and *shRhou-504*  $n=45$  hair pegs from 3 embryos. Data normal distribution was determined using the Shapiro-Wilk test. Parametric two-tailed unpaired *t*-test was used to compare the data. **(D)** RHO depletion via *shRhou-504* results in analogous defects in placode shape. Views from whole-mount immunofluorescence of CTRL and *shRhou-504* transduced placodes at the indicated representative plane. Note the larger placode area (dotted yellow line) in RHO-depleted tissue. Representation of  $n>3$  embryos.
