# Supplementary material for: An RNAi screen unravels the complexities of Rho GTPase networks in skin morphogenesis
Source: eLife. 2019 Sep 25;8:e50226. doi: 10.7554/eLife.50226 (PMC6768663; doi:10.7554/eLife.50226)
Supplement: Supplementary file 1. [file elife-50226-supp1.xlsx]

## Sheet: Sheet1
Supplementary File 1. shRNA Library Composition
Function	Gene #	Construct #	Gene ID	Clone ID
Rho GTPases
	1	1	Rac1	TRCN0000055188
		2	Rac1	TRCN0000055189
		3	Rac1	TRCN0000055190
		4	Rac1	TRCN0000055191
		5	Rac1	TRCN0000055192
		6	Rac1	TRCN0000310901
		7	Rac1	TRCN0000310888
		8	Rac1	TRCN0000310890
		9	Rac1	TRCN0000301589
		10	Rac1	TRCN0000301588
	2	11	Rac2	TRCN0000065343
		12	Rac2	TRCN0000065344
		13	Rac2	TRCN0000065345
		14	Rac2	TRCN0000065346
		15	Rac2	TRCN0000065347
	3	16	Rac3	TRCN0000065393
		17	Rac3	TRCN0000065394
		18	Rac3	TRCN0000065395
		19	Rac3	TRCN0000065396
		20	Rac3	TRCN0000065397
	4	21	Rhog	TRCN0000077728
		22	Rhog	TRCN0000077729
		23	Rhog	TRCN0000077731
		24	Rhog	TRCN0000077732
		25	Rhog	TRCN0000077730
	5	26	Rhoj	TRCN0000077565
		27	Rhoj	TRCN0000077566
		28	Rhoj	TRCN0000077567
		29	Rhoj	TRCN0000313430
		30	Rhoj	TRCN0000313500
		31	Rhoj	TRCN0000312323
		32	Rhoj	TRCN0000313499
		33	Rhoj	TRCN0000312386
	6	34	Rhoq	TRCN0000077513
		35	Rhoq	TRCN0000077514
		36	Rhoq	TRCN0000077515
		37	Rhoq	TRCN0000077516
		38	Rhoq	TRCN0000077517
	7	39	Cdc42	TRCN0000071683
		40	Cdc42	TRCN0000071684
		41	Cdc42	TRCN0000071685
		42	Cdc42	TRCN0000071686
		43	Cdc42	TRCN0000071687
	8	44	Rhou	TRCN0000077503
		45	Rhou	TRCN0000077504
		46	Rhou	TRCN0000077505
		47	Rhou	TRCN0000077506
		48	Rhou	TRCN0000077507
		49	Rhou	TRCN0000287359
		50	Rhou	TRCN0000287360
		51	Rhou	TRCN0000287358
		52	Rhou	TRCN0000287361
	9	53	Rhov	TRCN0000077668
		54	Rhov	TRCN0000077669
		55	Rhov	TRCN0000077670
		56	Rhov	TRCN0000077671
		57	Rhov	TRCN0000077672
	10	58	Rhoh	TRCN0000102700
		59	Rhoh	TRCN0000102701
		60	Rhoh	TRCN0000102702
		61	Rhoh	TRCN0000102703
		62	Rhoh	TRCN0000102704
	11	63	Rhoa	TRCN0000068198
		64	Rhoa	TRCN0000068199
		65	Rhoa	TRCN0000068200
		66	Rhoa	TRCN0000068201
		67	Rhoa	TRCN0000068202
		68	Rhoa	TRCN0000304690
		69	Rhoa	TRCN0000311121
		70	Rhoa	TRCN0000304743
		71	Rhoa	TRCN0000304744
		72	Rhoa	TRCN0000302388
	12	73	Rhoc	TRCN0000077543
		74	Rhoc	TRCN0000077544
		75	Rhoc	TRCN0000077545
		76	Rhoc	TRCN0000077546
		77	Rhoc	TRCN0000077547
		78	Rhoc	TRCN0000287419
		79	Rhoc	TRCN0000317127
		80	Rhoc	TRCN0000294846
		81	Rhoc	TRCN0000294782
	13	82	Rhob	TRCN0000077533
		83	Rhob	TRCN0000077534
		84	Rhob	TRCN0000077535
		85	Rhob	TRCN0000077536
		86	Rhob	TRCN0000077537
	14	87	Rhod	TRCN0000077548
		88	Rhod	TRCN0000077549
		89	Rhod	TRCN0000077550
		90	Rhod	TRCN0000077551
		91	Rhod	TRCN0000077552
		92	Rhod	TRCN0000294852
		93	Rhod	TRCN0000298316
		94	Rhod	TRCN0000294853
		95	Rhod	TRCN0000298319
		96	Rhod	TRCN0000298315
	15	97	Rhof	TRCN0000077678
		98	Rhof	TRCN0000077679
		99	Rhof	TRCN0000077680
		100	Rhof	TRCN0000077682
	16	101	Rnd3	TRCN0000077329
		102	Rnd3	TRCN0000077330
		103	Rnd3	TRCN0000077331
		104	Rnd3	TRCN0000077332
	17	105	Rnd2	TRCN0000077558
		106	Rnd2	TRCN0000077559
		107	Rnd2	TRCN0000077560
		108	Rnd2	TRCN0000077562
		109	Rnd2	TRCN0000077561
	18	110	Rnd1	TRCN0000089693
		111	Rnd1	TRCN0000089694
		112	Rnd1	TRCN0000089695
		113	Rnd1	TRCN0000089696
		114	Rnd1	TRCN0000089697
	19	115	Rhobtb1	TRCN0000226341
		116	Rhobtb1	TRCN0000252968
		117	Rhobtb1	TRCN0000226344
		118	Rhobtb1	TRCN0000226342
		119	Rhobtb1	TRCN0000226343
		120	Rhobtb1	TRCN0000252969
		121	Rhobtb1	TRCN0000252965
		122	Rhobtb1	TRCN0000252966
		123	Rhobtb1	TRCN0000252967
	20	124	Rhobtb2	TRCN0000097139
		125	Rhobtb2	TRCN0000097140
		126	Rhobtb2	TRCN0000097141
		127	Rhobtb2	TRCN0000097142
		128	Rhobtb2	TRCN0000097143
RhoGEFs
	1	129	Dock1	TRCN0000252178
		130	Dock1	TRCN0000258207
		131	Dock1	TRCN0000252176
		132	Dock1	TRCN0000252177
		133	Dock1	TRCN0000252175
	2	134	Dock2	TRCN0000091243
		135	Dock2	TRCN0000091244
		136	Dock2	TRCN0000091245
		137	Dock2	TRCN0000091246
		138	Dock2	TRCN0000091247
	3	139	Dock3	TRCN0000105686
		140	Dock3	TRCN0000105687
		141	Dock3	TRCN0000105688
		142	Dock3	TRCN0000105689
		143	Dock3	TRCN0000105685
	4	144	Dock4	TRCN0000105910
		145	Dock4	TRCN0000105911
		146	Dock4	TRCN0000105912
		147	Dock4	TRCN0000105913
		148	Dock4	TRCN0000105914
	5	149	Dock5	TRCN0000255509
		150	Dock5	TRCN0000255508
		151	Dock5	TRCN0000255507
		152	Dock5	TRCN0000255510
		153	Dock5	TRCN0000255511
	6	154	Dock6	TRCN0000249922
		155	Dock6	TRCN0000249924
		156	Dock6	TRCN0000183543
		157	Dock6	TRCN0000183118
		158	Dock6	TRCN0000183960
	7	159	Dock7	TRCN0000244526
		160	Dock7	TRCN0000244525
		161	Dock7	TRCN0000244528
		162	Dock7	TRCN0000244527
		163	Dock7	TRCN0000217351
		164	Dock7	TRCN0000215569
		165	Dock7	TRCN0000200829
		166	Dock7	TRCN0000191485
	8	167	Dock8	TRCN0000241446
		168	Dock8	TRCN0000241447
		169	Dock8	TRCN0000202130
		170	Dock8	TRCN0000191834
		171	Dock8	TRCN0000215865
	9	172	Dock9	TRCN0000253069
		173	Dock9	TRCN0000253067
		174	Dock9	TRCN0000253068
		175	Dock9	TRCN0000253065
		176	Dock9	TRCN0000253066
	10	177	Dock10	TRCN0000251515
		178	Dock10	TRCN0000251514
		179	Dock10	TRCN0000265176
		180	Dock10	TRCN0000251513
		181	Dock10	TRCN0000251516
	11	182	Dock11	TRCN0000217343
		183	Dock11	TRCN0000217207
		184	Dock11	TRCN0000200778
	12	185	Arhgef1	TRCN0000110050
		186	Arhgef1	TRCN0000110051
		187	Arhgef1	TRCN0000110052
		188	Arhgef1	TRCN0000110053
		189	Arhgef1	TRCN0000110054
	13	190	Arhgef2	TRCN0000109985
		191	Arhgef2	TRCN0000109986
		192	Arhgef2	TRCN0000109987
		193	Arhgef2	TRCN0000109988
		194	Arhgef2	TRCN0000109989
	14	195	Arhgef3	TRCN0000110045
		196	Arhgef3	TRCN0000110046
		197	Arhgef3	TRCN0000110047
		198	Arhgef3	TRCN0000110048
		199	Arhgef3	TRCN0000110049
	15	200	Arhgef4	TRCN0000110030
		201	Arhgef4	TRCN0000110031
		202	Arhgef4	TRCN0000110032
		203	Arhgef4	TRCN0000110033
		204	Arhgef4	TRCN0000110034
	16	205	Arhgef5	TRCN0000258214
		206	Arhgef5	TRCN0000252190
		207	Arhgef5	TRCN0000252191
		208	Arhgef5	TRCN0000252189
		209	Arhgef5	TRCN0000252188
	17	210	Arhgef6	TRCN0000110190
		211	Arhgef6	TRCN0000110191
		212	Arhgef6	TRCN0000110192
		213	Arhgef6	TRCN0000110193
		214	Arhgef6	TRCN0000110194
	18	215	Arhgef7	TRCN0000110025
		216	Arhgef7	TRCN0000110026
		217	Arhgef7	TRCN0000110027
		218	Arhgef7	TRCN0000110028
		219	Arhgef7	TRCN0000110029
		220	Arhgef7	TRCN0000305874
		221	Arhgef7	TRCN0000305803
		222	Arhgef7	TRCN0000353879
		223	Arhgef7	TRCN0000324966
		224	Arhgef7	TRCN0000324967
	19	225	Net1	TRCN0000110080
		226	Net1	TRCN0000110081
		227	Net1	TRCN0000110082
		228	Net1	TRCN0000110083
		229	Net1	TRCN0000110084
	20	230	Arhgef9	TRCN0000226312
		231	Arhgef9	TRCN0000226311
		232	Arhgef9	TRCN0000226313
		233	Arhgef9	TRCN0000226310
		234	Arhgef9	TRCN0000218589
		235	Arhgef9	TRCN0000258240
		236	Arhgef9	TRCN0000252488
		237	Arhgef9	TRCN0000258222
		238	Arhgef9	TRCN0000258242
		239	Arhgef9	TRCN0000252487
	21	240	Arhgef10	TRCN0000113370
		241	Arhgef10	TRCN0000113371
		242	Arhgef10	TRCN0000113372
		243	Arhgef10	TRCN0000113373
		244	Arhgef10	TRCN0000113374
		245	Arhgef10l	TRCN0000257664
	22	246	Arhgef10l	TRCN0000247942
		247	Arhgef10l	TRCN0000247944
		248	Arhgef10l	TRCN0000217893
		249	Arhgef10l	TRCN0000216672
		250	Arhgef10l	TRCN0000190883
	23	251	Arhgef11	TRCN0000110180
		252	Arhgef11	TRCN0000110181
		253	Arhgef11	TRCN0000110182
		254	Arhgef11	TRCN0000110183
		255	Arhgef11	TRCN0000110184
	24	256	Arhgef12	TRCN0000109960
		257	Arhgef12	TRCN0000109961
		258	Arhgef12	TRCN0000109962
		259	Arhgef12	TRCN0000109963
		260	Arhgef12	TRCN0000109964
	25	261	Akap13	TRCN0000254529
		262	Akap13	TRCN0000265561
		263	Akap13	TRCN0000254531
		264	Akap13	TRCN0000265562
		265	Akap13	TRCN0000254530
	26	266	Arhgef15	TRCN0000012883
		267	Arhgef15	TRCN0000012884
		268	Arhgef15	TRCN0000012885
		269	Arhgef15	TRCN0000012886
		270	Arhgef15	TRCN0000012887
		271	Arhgef15	TRCN0000193874
		272	Arhgef15	TRCN0000194334
		273	Arhgef15	TRCN0000173451
		274	Arhgef15	TRCN0000175834
		275	Arhgef15	TRCN0000175420
		276	Arhgef15	TRCN0000216961
		277	Arhgef15	TRCN0000173305
	27	278	Arhgef16	TRCN0000251394
		279	Arhgef16	TRCN0000251392
		280	Arhgef16	TRCN0000251391
		281	Arhgef16	TRCN0000251395
		282	Arhgef16	TRCN0000251393
	28	283	Arhgef17	TRCN0000252552
		284	Arhgef17	TRCN0000267420
		285	Arhgef17	TRCN0000252553
		286	Arhgef17	TRCN0000252551
		287	Arhgef17	TRCN0000252554
	29	288	Arhgef18	TRCN0000110151
		289	Arhgef18	TRCN0000110152
		290	Arhgef18	TRCN0000110153
		291	Arhgef18	TRCN0000110154
	30	292	Arhgef19	TRCN0000120377
		293	Arhgef19	TRCN0000120378
		294	Arhgef19	TRCN0000120379
		295	Arhgef19	TRCN0000120380
		296	Arhgef19	TRCN0000120381
	31	297	Trio	TRCN0000254106
		298	Trio	TRCN0000265457
		299	Trio	TRCN0000254108
		300	Trio	TRCN0000254105
		301	Trio	TRCN0000254107
	32	302	Kalrn	TRCN0000024364
		303	Kalrn	TRCN0000024365
		304	Kalrn	TRCN0000024366
		305	Kalrn	TRCN0000024367
		306	Kalrn	TRCN0000024368
	33	307	Arhgef25	TRCN0000120372
		308	Arhgef25	TRCN0000120373
		309	Arhgef25	TRCN0000120374
		310	Arhgef25	TRCN0000120375
		311	Arhgef25	TRCN0000120376
	34	312	Arhgef26	TRCN0000269354
		313	Arhgef26	TRCN0000269384
		314	Arhgef26	TRCN0000269338
		315	Arhgef26	TRCN0000284000
	35	316	Ngef	TRCN0000240855
		317	Ngef	TRCN0000240856
		318	Ngef	TRCN0000240854
		319	Ngef	TRCN0000257122
		320	Ngef	TRCN0000193333
		321	Ngef	TRCN0000215945
		322	Ngef	TRCN0000174393
		323	Ngef	TRCN0000176123
	36	324	Spata13	TRCN0000346829
		325	Spata13	TRCN0000363971
		326	Spata13	TRCN0000346770
	37	327	Obsn	TRCN0000110015
		328	Obsn	TRCN0000110016
		329	Obsn	TRCN0000110017
		330	Obsn	TRCN0000110018
		331	Obsn	TRCN0000110019
	38	332	Ect2	TRCN0000190717
		333	Ect2	TRCN0000190489
		334	Ect2	TRCN0000191475
		335	Ect2	TRCN0000190976
		336	Ect2	TRCN0000336497
		337	Ect2	TRCN0000353445
		338	Ect2	TRCN0000336440
		339	Ect2	TRCN0000336437
		340	Ect2	TRCN0000216416
		341	Ect2	TRCN0000216338
		342	Ect2	TRCN0000215378
		343	Ect2	TRCN0000201945
		344	Ect2	TRCN0000201874
		345	Ect2	TRCN0000217720
	39	346	Arhgef33	TRCN0000341726
		347	Arhgef33	TRCN0000341800
		348	Arhgef33	TRCN0000341728
		349	Arhgef33	TRCN0000341801
		350	Arhgef33	TRCN0000341727
	40	351	Dnmbp	TRCN0000192763
		352	Dnmbp	TRCN0000189782
		353	Dnmbp	TRCN0000202219
		354	Dnmbp	TRCN0000190877
		355	Dnmbp	TRCN0000329105
		356	Dnmbp	TRCN0000329046
		357	Dnmbp	TRCN0000329106
		358	Dnmbp	TRCN0000375295
	41	359	Arhgef37	TRCN0000110200
		360	Arhgef37	TRCN0000110201
		361	Arhgef37	TRCN0000110202
		362	Arhgef37	TRCN0000110203
		363	Arhgef37	TRCN0000110204
	42	364	Arhgef38	TRCN0000106210
		365	Arhgef38	TRCN0000106212
		366	Arhgef38	TRCN0000106213
		367	Arhgef38	TRCN0000106214
	43	368	Arhgef40	TRCN0000121407
		369	Arhgef40	TRCN0000121408
		370	Arhgef40	TRCN0000121409
		371	Arhgef40	TRCN0000121410
		372	Arhgef40	TRCN0000121411
	44	373	Plekhg1	TRCN0000251308
		374	Plekhg1	TRCN0000251311
		375	Plekhg1	TRCN0000265173
		376	Plekhg1	TRCN0000251309
		377	Plekhg1	TRCN0000251310
	45	378	Plekhg2	TRCN0000201414
		379	Plekhg2	TRCN0000201319
		380	Plekhg2	TRCN0000192492
		381	Plekhg2	TRCN0000191254
		382	Plekhg2	TRCN0000201464
	46	383	Plekhg3	TRCN0000179378
		384	Plekhg3	TRCN0000179690
		385	Plekhg3	TRCN0000179405
		386	Plekhg3	TRCN0000179636
		387	Plekhg3	TRCN0000184514
		388	Plekhg3	TRCN0000217056
		389	Plekhg3	TRCN0000183385
		390	Plekhg3	TRCN0000183787
	47	391	Plekhg4	TRCN0000248403
		392	Plekhg4	TRCN0000248402
		393	Plekhg4	TRCN0000248405
		394	Plekhg4	TRCN0000248406
		395	Plekhg4	TRCN0000248404
	48	396	Plekhg5	TRCN0000252699
		397	Plekhg5	TRCN0000267436
		398	Plekhg5	TRCN0000267454
		399	Plekhg5	TRCN0000252700
		400	Plekhg5	TRCN0000252698
	49	401	Plekhg6	TRCN0000121052
		402	Plekhg6	TRCN0000121053
		403	Plekhg6	TRCN0000121054
		404	Plekhg6	TRCN0000121056
		405	Plekhg6	TRCN0000121055
	50	406	Prex1	TRCN0000247269
		407	Prex1	TRCN0000247271
		408	Prex1	TRCN0000247273
		409	Prex1	TRCN0000247270
		410	Prex1	TRCN0000247272
	51	411	Prex2	TRCN0000081348
		412	Prex2	TRCN0000081349
		413	Prex2	TRCN0000081350
		414	Prex2	TRCN0000081351
		415	Prex2	TRCN0000081352
	52	416	Farp1	TRCN0000251724
		417	Farp1	TRCN0000251725
		418	Farp1	TRCN0000251726
		419	Farp1	TRCN0000251728
		420	Farp1	TRCN0000196006
		421	Farp1	TRCN0000183277
		422	Farp1	TRCN0000184111
		423	Farp1	TRCN0000216461
	53	424	Farp2	TRCN0000120382
		425	Farp2	TRCN0000120383
		426	Farp2	TRCN0000120384
		427	Farp2	TRCN0000120385
		428	Farp2	TRCN0000120386
	54	429	Fgd1	TRCN0000110020
		430	Fgd1	TRCN0000110021
		431	Fgd1	TRCN0000110022
		432	Fgd1	TRCN0000110023
		433	Fgd1	TRCN0000110024
		434	Fgd1	TRCN0000340739
		435	Fgd1	TRCN0000352455
		436	Fgd1	TRCN0000340791
		437	Fgd1	TRCN0000352456
	55	438	Fgd2	TRCN0000110040
		439	Fgd2	TRCN0000110041
		440	Fgd2	TRCN0000110042
		441	Fgd2	TRCN0000110044
	56	442	Fgd3	TRCN0000109980
		443	Fgd3	TRCN0000109981
		444	Fgd3	TRCN0000109982
		445	Fgd3	TRCN0000109983
		446	Fgd3	TRCN0000109984
	57	447	Fgd4	TRCN0000109955
		448	Fgd4	TRCN0000109956
		449	Fgd4	TRCN0000109957
		450	Fgd4	TRCN0000109958
		451	Fgd4	TRCN0000109959
	58	452	Fgd5	TRCN0000110065
		453	Fgd5	TRCN0000110066
		454	Fgd5	TRCN0000110067
		455	Fgd5	TRCN0000110068
		456	Fgd5	TRCN0000110069
	59	457	Fgd6	TRCN0000055348
		458	Fgd6	TRCN0000055349
		459	Fgd6	TRCN0000055350
		460	Fgd6	TRCN0000055352
		461	Fgd6	TRCN0000055351
		462	Fgd6	TRCN0000287168
		463	Fgd6	TRCN0000294613
		464	Fgd6	TRCN0000287169
		465	Fgd6	TRCN0000287110
	60	466	Itsn1	TRCN0000026173
		467	Itsn1	TRCN0000026196
		468	Itsn1	TRCN0000026163
		469	Itsn1	TRCN0000026190
		470	Itsn1	TRCN0000026180
		471	Itsn1	TRCN0000111565
		472	Itsn1	TRCN0000111566
		473	Itsn1	TRCN0000111567
		474	Itsn1	TRCN0000111568
		475	Itsn1	TRCN0000111569
		476	Itsn1	TRCN0000328078
		477	Itsn1	TRCN0000328006
		478	Itsn1	TRCN0000328009
	61	479	Itsn2	TRCN0000111750
		480	Itsn2	TRCN0000111751
		481	Itsn2	TRCN0000111752
		482	Itsn2	TRCN0000111753
		483	Itsn2	TRCN0000111754
	62	484	Vav1	TRCN0000042608
		485	Vav1	TRCN0000042609
		486	Vav1	TRCN0000042610
		487	Vav1	TRCN0000042611
		488	Vav1	TRCN0000042612
	63	489	Vav2	TRCN0000097094
		490	Vav2	TRCN0000097095
		491	Vav2	TRCN0000097096
		492	Vav2	TRCN0000097097
		493	Vav2	TRCN0000097098
	64	494	Vav3	TRCN0000097124
		495	Vav3	TRCN0000097125
		496	Vav3	TRCN0000097126
		497	Vav3	TRCN0000097127
		498	Vav3	TRCN0000097128
	65	499	Arhgef28	TRCN0000110060
		500	Arhgef28	TRCN0000110061
		501	Arhgef28	TRCN0000110062
		502	Arhgef28	TRCN0000110063
		503	Arhgef28	TRCN0000110064
	66	504	Tiam1	TRCN0000042593
		505	Tiam1	TRCN0000042595
		506	Tiam1	TRCN0000042596
		507	Tiam1	TRCN0000042597
		508	Tiam1	TRCN0000042594
		509	Tiam1	TRCN0000329078
		510	Tiam1	TRCN0000329017
	67	511	Tiam2	TRCN0000110005
		512	Tiam2	TRCN0000110006
		513	Tiam2	TRCN0000110007
		514	Tiam2	TRCN0000110008
		515	Tiam2	TRCN0000110009
		516	Tiam2	TRCN0000238428
	68	517	Sos1	TRCN0000065423
		518	Sos1	TRCN0000065424
		519	Sos1	TRCN0000065425
		520	Sos1	TRCN0000065426
		521	Sos1	TRCN0000065427
		522	Sos1	TRCN0000348732
		523	Sos1	TRCN0000351968
	69	524	Sos2	TRCN0000076953
		525	Sos2	TRCN0000076954
		526	Sos2	TRCN0000076955
		527	Sos2	TRCN0000076956
		528	Sos2	TRCN0000076957
	70	529	Abr	TRCN0000105835
		530	Abr	TRCN0000105836
		531	Abr	TRCN0000105837
		532	Abr	TRCN0000105838
		533	Abr	TRCN0000105839
	71	534	Bcr	TRCN0000023929
		535	Bcr	TRCN0000023930
		536	Bcr	TRCN0000023931
		537	Bcr	TRCN0000023932
		538	Bcr	TRCN0000023933
		539	Bcr	TRCN0000365984
		540	Bcr	TRCN0000374363
		541	Bcr	TRCN0000374298
		542	Bcr	TRCN0000365983
		543	Bcr	TRCN0000366057
	72	544	Rasgrf1	TRCN0000077588
		545	Rasgrf1	TRCN0000077589
		546	Rasgrf1	TRCN0000077590
		547	Rasgrf1	TRCN0000077591
		548	Rasgrf1	TRCN0000077592
	73	549	Rasgrf2	TRCN0000077593
		550	Rasgrf2	TRCN0000077594
		551	Rasgrf2	TRCN0000077595
		552	Rasgrf2	TRCN0000077596
		553	Rasgrf2	TRCN0000077597
	74	554	Als2	TRCN0000041028
		555	Als2	TRCN0000041029
		556	Als2	TRCN0000041030
		557	Als2	TRCN0000041031
		558	Als2	TRCN0000041032
	75	559	Arhgef39	TRCN0000268167
		560	Arhgef39	TRCN0000283619
		561	Arhgef39	TRCN0000268121
		562	Arhgef39	TRCN0000283621
		563	Arhgef39	TRCN0000268169
	76	564	Mcf2l	TRCN0000110010
		565	Mcf2l	TRCN0000110011
		566	Mcf2l	TRCN0000110013
		567	Mcf2l	TRCN0000110014
		568	Mcf2l	TRCN0000110012
	77	569	Mcf2	TRCN0000042653
		570	Mcf2	TRCN0000042654
		571	Mcf2	TRCN0000042656
		572	Mcf2	TRCN0000042657
		573	Mcf2	TRCN0000174066
		574	Mcf2	TRCN0000174067
RhoGAPs
	1	575	Arhgap1	TRCN0000097234
		576	Arhgap1	TRCN0000097236
		577	Arhgap1	TRCN0000097237
		578	Arhgap1	TRCN0000097238
		579	Arhgap1	TRCN0000097235
	2	580	Chn1	TRCN0000112395
		581	Chn1	TRCN0000112396
		582	Chn1	TRCN0000112397
		583	Chn1	TRCN0000112398
		584	Chn1	TRCN0000112399
	3	585	Chn2	TRCN0000112400
		586	Chn2	TRCN0000112401
		587	Chn2	TRCN0000112403
		588	Chn2	TRCN0000112404
		589	Chn2	TRCN0000112402
	4	590	Arhgap4	TRCN0000071698
		591	Arhgap4	TRCN0000071699
		592	Arhgap4	TRCN0000071700
		593	Arhgap4	TRCN0000071701
		594	Arhgap4	TRCN0000071702
	5	595	Arhgap5	TRCN0000012703
		596	Arhgap5	TRCN0000012704
		597	Arhgap5	TRCN0000012705
		598	Arhgap5	TRCN0000012706
		599	Arhgap5	TRCN0000012707
		600	Arhgap5	TRCN0000321110
		601	Arhgap5	TRCN0000321112
		602	Arhgap5	TRCN0000360421
		603	Arhgap5	TRCN0000360350
	6	604	Arhgap6	TRCN0000105715
		605	Arhgap6	TRCN0000105716
		606	Arhgap6	TRCN0000105717
		607	Arhgap6	TRCN0000105718
		608	Arhgap6	TRCN0000105719
		609	Arhgap6	TRCN0000362895
		610	Arhgap6	TRCN0000378400
	7	611	Dlc1	TRCN0000251075
		612	Dlc1	TRCN0000265295
		613	Dlc1	TRCN0000251078
		614	Dlc1	TRCN0000251077
		615	Dlc1	TRCN0000193804
		616	Dlc1	TRCN0000173484
		617	Dlc1	TRCN0000173288
		618	Dlc1	TRCN0000217664
	8	619	Arhgap8	TRCN0000097334
		620	Arhgap8	TRCN0000097335
		621	Arhgap8	TRCN0000097336
		622	Arhgap8	TRCN0000097337
		623	Arhgap8	TRCN0000097338
	9	624	Arhgap9	TRCN0000105740
		625	Arhgap9	TRCN0000105741
		626	Arhgap9	TRCN0000105742
		627	Arhgap9	TRCN0000105743
		628	Arhgap9	TRCN0000105744
		629	Arhgap9	TRCN0000306656
		630	Arhgap9	TRCN0000311584
		631	Arhgap9	TRCN0000327238
		632	Arhgap9	TRCN0000327312
	10	633	Arhgap10	TRCN0000094794
		634	Arhgap10	TRCN0000094795
		635	Arhgap10	TRCN0000094796
		636	Arhgap10	TRCN0000094797
		637	Arhgap10	TRCN0000094798
	11	638	Arhgap11a	TRCN0000193331
		639	Arhgap11a	TRCN0000193632
		640	Arhgap11a	TRCN0000193495
		641	Arhgap11a	TRCN0000193496
	12	642	Arhgap12	TRCN0000105720
		643	Arhgap12	TRCN0000105721
		644	Arhgap12	TRCN0000105722
		645	Arhgap12	TRCN0000105724
		646	Arhgap12	TRCN0000105723
		647	Arhgap12	TRCN0000306652
	13	648	Srgap1	TRCN0000251713
		649	Srgap1	TRCN0000251715
		650	Srgap1	TRCN0000251716
		651	Srgap1	TRCN0000251714
		652	Srgap1	TRCN0000265238
	14	653	Srgap3	TRCN0000106030
		654	Srgap3	TRCN0000106031
		655	Srgap3	TRCN0000106032
		656	Srgap3	TRCN0000106033
		657	Srgap3	TRCN0000106034
	15	658	Arhgap15	TRCN0000177133
		659	Arhgap15	TRCN0000177745
		660	Arhgap15	TRCN0000176672
		661	Arhgap15	TRCN0000177416
		662	Arhgap15	TRCN0000176755
		663	Arhgap15	TRCN0000198324
		664	Arhgap15	TRCN0000197579
		665	Arhgap15	TRCN0000197586
	16	666	Arhgap17	TRCN0000112875
		667	Arhgap17	TRCN0000112876
		668	Arhgap17	TRCN0000112877
		669	Arhgap17	TRCN0000112878
		670	Arhgap17	TRCN0000112879
		671	Arhgap17	TRCN0000317850
		672	Arhgap17	TRCN0000319599
		673	Arhgap17	TRCN0000319598
		674	Arhgap17	TRCN0000317849
	17	675	Arhgap18	TRCN0000249051
		676	Arhgap18	TRCN0000249053
		677	Arhgap18	TRCN0000249052
		678	Arhgap18	TRCN0000249049
		679	Arhgap18	TRCN0000249050
		680	Arhgap18	TRCN0000216283
		681	Arhgap18	TRCN0000200492
		682	Arhgap18	TRCN0000201719
		683	Arhgap18	TRCN0000201720
	18	684	Arhgap19	TRCN0000191390
		685	Arhgap19	TRCN0000201124
		686	Arhgap19	TRCN0000191107
		687	Arhgap19	TRCN0000192761
		688	Arhgap19	TRCN0000201329
	19	689	Arhgap20	TRCN0000097339
		690	Arhgap20	TRCN0000097340
		691	Arhgap20	TRCN0000097341
		692	Arhgap20	TRCN0000097343
		693	Arhgap20	TRCN0000097342
	20	694	Arhgap21	TRCN0000252186
		695	Arhgap21	TRCN0000252184
		696	Arhgap21	TRCN0000258194
		697	Arhgap21	TRCN0000252187
		698	Arhgap21	TRCN0000252185
	21	699	Arhgap22	TRCN0000182081
		700	Arhgap22	TRCN0000177132
		701	Arhgap22	TRCN0000181601
		702	Arhgap22	TRCN0000181968
		703	Arhgap22	TRCN0000182379
		704	Arhgap22	TRCN0000197662
	22	705	Arhgap23	TRCN0000184524
		706	Arhgap23	TRCN0000179417
		707	Arhgap23	TRCN0000183413
		708	Arhgap23	TRCN0000184061
		709	Arhgap23	TRCN0000184726
		710	Arhgap23	TRCN0000339828
		711	Arhgap23	TRCN0000217665
		712	Arhgap23	TRCN0000217347
		713	Arhgap23	TRCN0000195757
		714	Arhgap23	TRCN0000184154
	23	715	Arhgap24	TRCN0000023914
		716	Arhgap24	TRCN0000023915
		717	Arhgap24	TRCN0000023916
		718	Arhgap24	TRCN0000023917
		719	Arhgap24	TRCN0000023918
		720	Arhgap24	TRCN0000362114
		721	Arhgap24	TRCN0000368828
	24	722	Arhgap25	TRCN0000190690
		723	Arhgap25	TRCN0000200737
		724	Arhgap25	TRCN0000190509
		725	Arhgap25	TRCN0000192525
	25	726	Arhgap26	TRCN0000094889
		727	Arhgap26	TRCN0000094890
		728	Arhgap26	TRCN0000094891
		729	Arhgap26	TRCN0000094892
		730	Arhgap26	TRCN0000094893
	26	731	Arhgap27	TRCN0000267530
		732	Arhgap27	TRCN0000267528
		733	Arhgap27	TRCN0000254980
		734	Arhgap27	TRCN0000254979
	27	735	Arhgap28	TRCN0000178866
		736	Arhgap28	TRCN0000183452
		737	Arhgap28	TRCN0000179210
		738	Arhgap28	TRCN0000195897
	28	739	Arhgap29	TRCN0000362045
		740	Arhgap29	TRCN0000361989
	29	741	Arhgap30	TRCN0000105725
		742	Arhgap30	TRCN0000105726
		743	Arhgap30	TRCN0000105727
		744	Arhgap30	TRCN0000105728
		745	Arhgap30	TRCN0000105729
	30	746	Arhgap31	TRCN0000105800
		747	Arhgap31	TRCN0000105801
		748	Arhgap31	TRCN0000105802
		749	Arhgap31	TRCN0000105803
		750	Arhgap31	TRCN0000105804
	31	751	Arhgap32	TRCN0000105660
		752	Arhgap32	TRCN0000105661
		753	Arhgap32	TRCN0000105662
		754	Arhgap32	TRCN0000105663
		755	Arhgap32	TRCN0000105664
	32	756	Arhgap33	TRCN0000105960
		757	Arhgap33	TRCN0000105961
		758	Arhgap33	TRCN0000105962
		759	Arhgap33	TRCN0000105963
		760	Arhgap33	TRCN0000105964
	33	761	Srgap2	TRCN0000106110
		762	Srgap2	TRCN0000106111
		763	Srgap2	TRCN0000106112
		764	Srgap2	TRCN0000106113
		765	Srgap2	TRCN0000106114
	34	766	Grlf1	TRCN0000243514
		767	Grlf1	TRCN0000243512
		768	Grlf1	TRCN0000243515
		769	Grlf1	TRCN0000243511
		770	Grlf1	TRCN0000243513
		771	Grlf1	TRCN0000216719
		772	Grlf1	TRCN0000216769
		773	Grlf1	TRCN0000174015
		774	Grlf1	TRCN0000174933
	35	775	Arhgap36	TRCN0000283770
		776	Arhgap36	TRCN0000268751
		777	Arhgap36	TRCN0000283769
		778	Arhgap36	TRCN0000268695
		779	Arhgap36	TRCN0000268750
	36	780	Stard13	TRCN0000106250
		781	Stard13	TRCN0000106251
		782	Stard13	TRCN0000106252
		783	Stard13	TRCN0000106253
		784	Stard13	TRCN0000106254
	37	785	Stard8	TRCN0000106145
		786	Stard8	TRCN0000106146
		787	Stard8	TRCN0000106147
		788	Stard8	TRCN0000106148
		789	Stard8	TRCN0000106149
	38	790	Arhgap39	TRCN0000097184
		791	Arhgap39	TRCN0000097186
		792	Arhgap39	TRCN0000097188
		793	Arhgap39	TRCN0000097187
		794	Arhgap39	TRCN0000097185
	39	795	Arhgap40	TRCN0000347567
		796	Arhgap40	TRCN0000347489
		797	Arhgap40	TRCN0000347568
		798	Arhgap40	TRCN0000347490
		799	Arhgap40	TRCN0000363896
	40	800	Ophn1	TRCN0000113070
		801	Ophn1	TRCN0000113071
		802	Ophn1	TRCN0000113072
		803	Ophn1	TRCN0000113074
		804	Ophn1	TRCN0000113073
		805	Ophn1	TRCN0000350063
		806	Ophn1	TRCN0000319532
	41	807	Arhgap42	TRCN0000267256
		808	Arhgap42	TRCN0000267255
		809	Arhgap42	TRCN0000267257
		810	Arhgap42	TRCN0000267258
		811	Arhgap42	TRCN0000267254
	42	812	Sh3bp1	TRCN0000249435
		813	Sh3bp1	TRCN0000249436
		814	Sh3bp1	TRCN0000183828
		815	Sh3bp1	TRCN0000216620
		816	Sh3bp1	TRCN0000183745
		817	Sh3bp1	TRCN0000195846
	43	818	Arhgap44	TRCN0000201786
		819	Arhgap44	TRCN0000200812
		820	Arhgap44	TRCN0000192326
		821	Arhgap44	TRCN0000190477
		822	Arhgap44	TRCN0000201847
	44	823	Hmha1	TRCN0000090708
		824	Hmha1	TRCN0000090709
		825	Hmha1	TRCN0000090710
		826	Hmha1	TRCN0000090711
		827	Hmha1	TRCN0000090712
		828	Hmha1	TRCN0000306291
		829	Hmha1	TRCN0000306290
		830	Hmha1	TRCN0000354119
		831	Hmha1	TRCN0000326728
		832	Hmha1	TRCN0000326729
	45	833	Gmip	TRCN0000028282
		834	Gmip	TRCN0000028298
		835	Gmip	TRCN0000028289
		836	Gmip	TRCN0000028297
		837	Gmip	TRCN0000028244
	46	838	Tagap	TRCN0000097229
		839	Tagap	TRCN0000097232
		840	Tagap	TRCN0000097233
		841	Tagap	TRCN0000097230
		842	Tagap	TRCN0000097231
	47	843	Fam13a	TRCN0000216927
		844	Fam13a	TRCN0000216326
		845	Fam13a	TRCN0000201899
		846	Fam13a	TRCN0000191347
	48	847	Fam13b	TRCN0000340770
		848	Fam13b	TRCN0000340836
		849	Fam13b	TRCN0000193396
		850	Fam13b	TRCN0000176272
		851	Fam13b	TRCN0000173518
		852	Fam13b	TRCN0000193971
	49	853	Arap3	TRCN0000106135
		854	Arap3	TRCN0000106136
		855	Arap3	TRCN0000106137
		856	Arap3	TRCN0000106138
		857	Arap3	TRCN0000106139
		858	Arap3	TRCN0000295677
		859	Arap3	TRCN0000295678
		860	Arap3	TRCN0000288345
		861	Arap3	TRCN0000295613
	50	862	Ocrl	TRCN0000080953
		863	Ocrl	TRCN0000080954
		864	Ocrl	TRCN0000080955
		865	Ocrl	TRCN0000080956
		866	Ocrl	TRCN0000080957
	51	867	Arap2	TRCN0000252648
		868	Arap2	TRCN0000252645
		869	Arap2	TRCN0000252646
		870	Arap2	TRCN0000252647
		871	Arap2	TRCN0000252644
	52	872	Arap1	TRCN0000247788
		873	Arap1	TRCN0000247787
		874	Arap1	TRCN0000247789
		875	Arap1	TRCN0000257673
		876	Arap1	TRCN0000247786
	53	877	Racgap1	TRCN0000023949
		878	Racgap1	TRCN0000023950
		879	Racgap1	TRCN0000023951
		880	Racgap1	TRCN0000023952
		881	Racgap1	TRCN0000023953
		882	Racgap1	TRCN0000322156
		883	Racgap1	TRCN0000322158
		884	Racgap1	TRCN0000322222
		885	Racgap1	TRCN0000322221
		886	Racgap1	TRCN0000322219
	54	887	Ralbp1	TRCN0000106245
		888	Ralpb1	TRCN0000106246
		889	Ralpb1	TRCN0000106247
		890	Ralpb1	TRCN0000106248
		891	Ralpb1	TRCN0000106249
	55	892	Myo9a	TRCN0000339164
		893	Myo9a	TRCN0000339167
		894	Myo9a	TRCN0000339101
		895	Myo9a	TRCN0000339166
		896	Myo9a	TRCN0000339165
	56	897	Myo9b	TRCN0000025882
		898	Myo9b	TRCN0000025934
		899	Myo9b	TRCN0000025943
		900	Myo9b	TRCN0000025920
		901	Myo9b	TRCN0000025897
	57	902	Pik3r1	TRCN0000068193
		903	Pik3r1	TRCN0000068194
		904	Pik3r1	TRCN0000068195
		905	Pik3r1	TRCN0000068196
		906	Pik3r1	TRCN0000068197
		907	Pik3r1	TRCN0000304741
		908	Pik3r1	TRCN0000304740
		909	Pik3r1	TRCN0000302323
	58	910	Pik3r2	TRCN0000025085
		911	Pik3r2	TRCN0000025086
		912	Pik3r2	TRCN0000025087
		913	Pik3r2	TRCN0000025088
	59	914	Pik3r3	TRCN0000025089
		915	Pik3r3	TRCN0000025090
		916	Pik3r3	TRCN0000025091
		917	Pik3r3	TRCN0000025092
		918	Pik3r3	TRCN0000025093
	60	919	Depdc1b	TRCN0000173585
		920	Depdc1b	TRCN0000194491
		921	Depdc1b	TRCN0000193186
		922	Depdc1b	TRCN0000176211
		923	Depdc1b	TRCN0000193930
	61	924	Depdc1a	TRCN0000328643
		925	Depdc1a	TRCN0000328645
		926	Depdc1a	TRCN0000328646
		927	Depdc1a	TRCN0000328644
		928	Depdc1a	TRCN0000328715
		929	Depdc1a	TRCN0000215836
		930	Depdc1a	TRCN0000184009
		931	Depdc1a	TRCN0000180737
	62	932	gm1527 (6558)	TRCN0000267876
		933	gm1527 (6558)	TRCN0000267934
		934	gm1527 (6558)	TRCN0000267933
		935	gm1527 (6558)	TRCN0000267879
		936	gm1527 (6558)	TRCN0000267875
	63	937	Depdc7	TRCN0000191884
		938	Depdc7	TRCN0000191594
		939	Depdc7	TRCN0000191595
		940	Depdc7	TRCN0000200619
	64	941	Tagap1	TRCN0000254906
		942	Tagap1	TRCN0000254902
		943	Tagap1	TRCN0000254904
		944	Tagap1	TRCN0000254905
		945	Tagap1	TRCN0000254903
	65		Abr	TRCN0000105835
			Abr	TRCN0000105836
			Abr	TRCN0000105837
			Abr	TRCN0000105838
			Abr	TRCN0000105839
			Bcr	TRCN0000023929
	66		Bcr	TRCN0000023930
			Bcr	TRCN0000023931
			Bcr	TRCN0000023932
			Bcr	TRCN0000023933
			Bcr	TRCN0000365984
			Bcr	TRCN0000374363
			Bcr	TRCN0000374298
			Bcr	TRCN0000365983
			Bcr	TRCN0000366057
RhoGDIs
	1	946	Arhgdia	TRCN0000106160
		947	Arhgdia	TRCN0000106161
		948	Arhgdia	TRCN0000106162
		949	Arhgdia	TRCN0000106163
		950	Arhgdia	TRCN0000106164
	2	951	Arhgdib	TRCN0000106180
		952	Arhgdib	TRCN0000106181
		953	Arhgdib	TRCN0000106182
		954	Arhgdib	TRCN0000106183
		955	Arhgdib	TRCN0000106184
	3	956	Arhgdig	TRCN0000106140
		957	Arhgdig	TRCN0000106142
		958	Arhgdig	TRCN0000106143
		959	Arhgdig	TRCN0000106144
Others
Myh9	1	960	Myh9	TRCN0000071503
		961	Myh9	TRCN0000071504
		962	Myh9	TRCN0000071505
		963	Myh9	TRCN0000071506
		964	Myh9	TRCN0000071507
Myh10	2	965	Myh10	TRCN0000110555
		966	Myh10	TRCN0000110556
		967	Myh10	TRCN0000110558
		968	Myh10	TRCN0000110559
		969	Myh10	TRCN0000110557
Myh14	3	970	Myh14	TRCN0000110570
		971	Myh14	TRCN0000110571
		972	Myh14	TRCN0000110572
		973	Myh14	TRCN0000110573
		974	Myh14	TRCN0000110574
Ctnnb1	4	975	Ctnnb1	TRCN0000012688
		976	Ctnnb1	TRCN0000012690
		977	Ctnnb1	TRCN0000012691
		978	Ctnnb1	TRCN0000012692
		979	Ctnnb1	TRCN0000012689
CTRL
LacZ	1	980	LacZ	TRCN0000072223
	2	981	LacZ	TRCN0000072224
	3	982	LacZ	TRCN0000072225
	4	983	LacZ	TRCN0000072232
	5	984	LacZ	TRCN0000072236
	6	985	LacZ	TRCN0000072237
	7	986	LacZ	TRCN0000072240
Luc	8	987	Luc	TRCN0000072243
	9	988	Luc	TRCN0000072245
	10	989	Luc	TRCN0000072246
	11	990	Luc	TRCN0000072248
	12	991	Luc	TRCN0000072249
	13	992	Luc	TRCN0000072250
	14	993	Luc	TRCN0000072251
	15	994	Luc	TRCN0000072252
	16	995	Luc	TRCN0000072256
	17	996	Luc	TRCN0000072260
	18	997	Luc	TRCN0000072261
	19	998	Luc	TRCN0000072264
	20	999	Luc	TRCN0000072266
