# Supplementary material for: An RNAi screen unravels the complexities of Rho GTPase networks in skin morphogenesis
Source: eLife. 2019 Sep 25;8:e50226. doi: 10.7554/eLife.50226 (PMC6768663; doi:10.7554/eLife.50226)
Supplement: Supplementary file 2. [file elife-50226-supp2.xlsx]

## Sheet: Sheet1
Supplementary File 2. Sequence Based Reagents
Index Barcodes
Samples	Barcodes	Forward primer sequence
In Vitro (n=1)	GAGCTGAA	AATGATACGGCGACCACCGAGATCTACACTCTTTCCCTACACGACGCTCTTCCGATCTGAGCTGAAgatttcttggctttatatatcttgtgg
In Vitro (n=2)	GATAGACA	AATGATACGGCGACCACCGAGATCTACACTCTTTCCCTACACGACGCTCTTCCGATCTGATAGACAgatttcttggctttatatatcttgtgg
In Vitro (n=3)	GCGAGTAA	AATGATACGGCGACCACCGAGATCTACACTCTTTCCCTACACGACGCTCTTCCGATCTGCGAGTAAgatttcttggctttatatatcttgtgg
E18.5 Epi (n=1)	GCTAACGA	AATGATACGGCGACCACCGAGATCTACACTCTTTCCCTACACGACGCTCTTCCGATCTGCTAACGAgatttcttggctttatatatcttgtgg
E18.5 Epi (n=2)	GCTCGGTA	AATGATACGGCGACCACCGAGATCTACACTCTTTCCCTACACGACGCTCTTCCGATCTGCTCGGTAgatttcttggctttatatatcttgtgg
E18.5 Epi (n=3)	TATCAGCA	AATGATACGGCGACCACCGAGATCTACACTCTTTCCCTACACGACGCTCTTCCGATCTTATCAGCAgatttcttggctttatatatcttgtgg
E18.5 HF (n=1)	GGAGAACA	AATGATACGGCGACCACCGAGATCTACACTCTTTCCCTACACGACGCTCTTCCGATCTGGAGAACAgatttcttggctttatatatcttgtgg
E18.5 HF (n=2)	TAGGATGA	AATGATACGGCGACCACCGAGATCTACACTCTTTCCCTACACGACGCTCTTCCGATCTTAGGATGAgatttcttggctttatatatcttgtgg
E18.5 HF (n=3)	TCTTCACA	AATGATACGGCGACCACCGAGATCTACACTCTTTCCCTACACGACGCTCTTCCGATCTTCTTCACAgatttcttggctttatatatcttgtgg
		Reverse universal primer sequence
		CAAGCAGAAGACGGCATACGAGCTCTTCCGATCTaattgtggatgaatactgccatttgtc
