# Supplementary material for: An RNAi screen unravels the complexities of Rho GTPase networks in skin morphogenesis
Source: eLife. 2019 Sep 25;8:e50226. doi: 10.7554/eLife.50226 (PMC6768663; doi:10.7554/eLife.50226)
Supplement: Supplementary file 6. [file elife-50226-supp6.xls]

## Sheet: Unique_Protein_hits
Supplementary File 6. List of RHOU's Interacting Partner in Growth conditions
		Condition	Condition	Condition	Condition	Condition	Condition
		GFP-2	GFP-3	GFP-1	RHOU-2	RHOU-3	RHOU-1
Accession	Gene	Area	Area	Area	Area	Area	Area
Q8CIN4	Pak2	0	0	0	2281000000	5961000000	8329000000
A0A0R4J0X8	Arhgef7	0	0	0	441400000	830100000	784700000
E9Q8Z5	Ctnnd1	0	0	0	232200000	729700000	547300000
G3X9V2	Ctnnd1	0	0	0	232200000	729700000	547300000
G5E884	Pak1	0	0	0	600100000	1742000000	5327000000
E9PVA6	Git2	0	0	0	74070000	370600000	125400000
Q9JLQ2	Git2	0	0	0	74070000	370600000	125400000
Q5F258	Git1	0	0	0	104200000	370600000	203300000
Q9EQT3	Rhou	0	0	0	2577000000	8513000000	2782000000
G5E8B1	Ptpn13	0	0	0	17870000	55530000	37090000
Q61937	Npm1	0	0	0	102900000	406400000	82630000
Q68FG2	Spnb3	0	0	0	5100000	40270000	21390000
O35902	Dsg3	0	0	0	6443000	14630000	7518000
Q8CCA0	Dcun1d4	0	0	0	119600000	435700000	104000000
Q80TH2	Erbb2ip	0	0	0	14860000	51720000	8405000
O88811	Stam2	0	0	0	23700000	185400000	47290000
A2ALK8	Ptpn3	0	0	0	26760000	249900000	23350000
Q8R1F1	Fam129b	0	0	0	60880000	115600000	37730000
Q3U319	Rnf40	0	0	0	2336000	0	8863000
P16546	Sptan1	0	0	0	0	30750000	8971000
F8VQ28	Pxn	0	0	0	37620000	71980000	38870000
P10852	Slc3a2	0	0	0	57760000	88280000	56570000
Q9JIW9	Ralb	0	0	0	108500000	155600000	235300000
P09055	Itgb1	0	0	0	33440000	165700000	50680000
O09044	Snap23	0	0	0	29780000	95150000	57760000
D3Z030	Lrrc16a	0	0	0	24050000	17750000	0
CON_00904379.1	Kng1	0	0	0	215900000	39510000	0
Q6ZWX6	Eif2s1	0	0	0	4786000	4374000	86180000
Q8K224	Nat10	0	0	0	3508000	7333000	27420000
Q9DBJ3	Baiap2l1	0	0	0	23810000	28780000	11510000
Q01279	Egfr	0	0	0	0	47000000	22710000
Q3UGN9	Stam	0	0	0	16530000	74870000	50300000
O70456	Sfn	0	0	0	3566000	15850000	62880000
Q3UHX9	D2Wsu81e	0	0	0	0	3164000	38560000
V9GWU5	Tpd52l2	0	0	0	0	26030000	13840000
G5E866	Sf3b1	0	0	0	3608000	7930000	0
P62192	Psmc1	0	0	0	3198000	0	25150000
A2BE93	Set	0	0	0	12900000	13860000	0
P70124	Serpinb5	0	0	0	5164000	0	57170000
CON_00703110.1	YWHAZ	0	0	0	5768000	9462000	22440000
Q3ULB1	Tes	0	0	0	8698000	2967000	4038000
Q6NZF1	Zc3h11a	0	0	0	9670000	12330000	0
Q80U72	Scrib	0	0	0	7787000	25590000	0
P14873	Map1b	0	0	0	6205000	0	23330000
Q80Y32	Hmgxb4	0	0	0	53170000	11880000	0
Q3UVL4	Vps51	0	0	0	13330000	32980000	0
Q8BGT6	Micall1	0	0	0	9213000	22860000	0
P62141	Ppp1cb	0	0	0	1825000	3061000	4729000
Q5SU73	Coil	0	0	0	7222000	8907000	0
Q8BMS1	Hadha	0	0	0	11530000	0	12090000
Q8R081	Hnrnpl	0	0	0	0	4718000	42040000
Q69Z38	Peak1	0	0	0	11840000	16280000	7041000
P62137	Ppp1ca	0	0	0	1825000	3061000	4729000
Q80XI4	Pip4k2b	0	0	0	0	2526000	48920000
Q9QYY0	Gab1	0	0	0	2853000	21000000	0
A0A087WNV1	Agfg1	0	0	0	15180000	25740000	13030000
Q9D0D5	Gtf2e1	0	0	0	7531000	17730000	0
G5E8C3	Gprc5a	0	0	0	34580000	35510000	36050000
P52795	Efnb1	0	0	0	8706000	0	2251000
Q9D883	U2af1	0	0	0	26350000	0	5395000
D3YVN7	Gm9755	0	0	0	5873000	0	34280000
A0A0G2JG10	Dhx15	0	0	0	1162000	0	5664000
Q80U44	Zfyve16	0	0	0	8753000	12000000	0
P63038	Hspd1	0	0	0	0	27580000	19640000
A2ADS6	Inadl	0	0	0	1135000	7713000	0
Q8BTY2	Slc4a7	0	0	0	5127000	7260000	5913000
Q8VDZ4	Zdhhc5	0	0	0	10300000	30940000	11100000
A0A0A0MQF7	1700025G04Rik	0	0	0	27120000	60870000	0
Q3TZX8	Nol9	0	0	0	31350000	65090000	0
Q78ZA7	Nap1l4	0	0	0	33550000	59970000	0
D3YUS5	Rasal2	0	0	0	3167000	11230000	12270000
Q6PGL7	Fam21	0	0	0	0	12810000	3243000
Q5SW87	Rab1	0	0	0	0	13980000	36360000
Q91W92	Cdc42ep1	0	0	0	19530000	35420000	16770000
Q99M51	Nck1	0	0	0	9851000	18130000	0
D3Z789	Snx3	0	0	0	22940000	14000000	0
Q9CQW1	Ykt6	0	0	0	18580000	45160000	0
E9Q1K7	Rgs12	0	0	0	16880000	0	13900000
P02802	Mt1	0	0	0	12430000	2720000	0
Q9D2Q8	S100a14	0	0	0	10960000	60260000	0
E9Q1K3	Add1	0	0	0	0	6419000	8223000
Q99PT1	Arhgdia	0	0	0	5080000	17640000	0
A0A087WRY3	Nucks1	0	0	0	0	67180000	14670000
F7C265	Ccdc47	0	0	0	3023000	0	2572000
Q8BZ33	Tns4	0	0	0	3485000	7282000	4682000
Q8C8U0	Ppfibp1	0	0	0	3485000	6353000	0
Q32M21	Gsdma2	0	0	0	11460000	14060000	0
Q3TZZ7	Esyt2	0	0	0	5634000	0	3698000
E9QPZ3	Flg2	0	0	0	6949000	1820000	0
Q3U7R1	Esyt1	0	0	0	2120000	6324000	0
Q5SVG5	Ap1b1	0	0	0	0	15230000	27370000
V9GX81	Mroh6	0	0	0	0	153800000	53400000
P80314	Cct2	0	0	0	3131000	4932000	0
D3Z4W5	1700074P13Rik	0	0	0	0	19470000	30280000
