# Supplementary figures and images for: An RNAi screen unravels the complexities of Rho GTPase networks in skin morphogenesis
Source: eLife journal article supplement (doi:10.7554/elife.50226), 2019-09-25

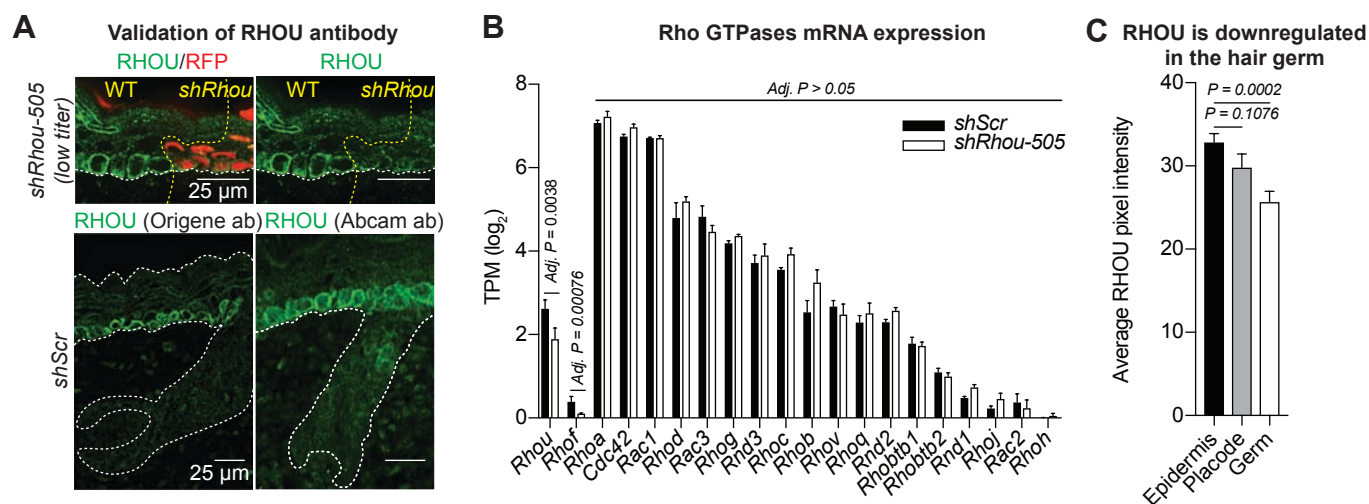

Supplement: supp [file elife_poa_e50226_Figure_3_figure_supplement_1.pdf › elife_poa_e50226_Figure_3_figure_supplement_1.pdf]
